# Supplementary material for: Synthesis of allylated quinolines/isoquinolines via palladium-catalyzed cyclization–allylation of azides and allyl methyl carbonate
Source: Royal Society of Chemistry journal article supplement (doi:10.1039/c4ob02567a), 2015-01-01

## Supplementary Data

### Synthesis of Allylated Quinolines/Isoquinolines via Palladium-catalyzed Cyclization-Allylation of Azides and Allyl Methyl Carbonate

Jiang Luo, <sup>a</sup> Zhibao Huo, <sup>a,\*</sup> Jun Fu, <sup>a</sup> Fangming Jin, <sup>a</sup> Yoshinori Yamamoto <sup>b</sup>

<sup>a</sup> School of Environmental Science and Engineering, the State Key Laboratory of Metal Matrix Composites, Shanghai Jiao Tong University, 800 Dongchuan Road, Shanghai 200240, China

<sup>b</sup> WPI-Advanced Institute for Materials Research (WPI-AIMR), Tohoku University, Sendai 980-8577, Japan; State Key Laboratory of Fine Chemicals, Dalian University of Technology, Dalian 116012, China

\* To whom correspondence should be addressed.  
E-mail: hzb410@sjtu.edu.cn; Tel/Fax: (86)21-54742251

**Table S1.** Optimization of the reaction conditions. <sup>a</sup>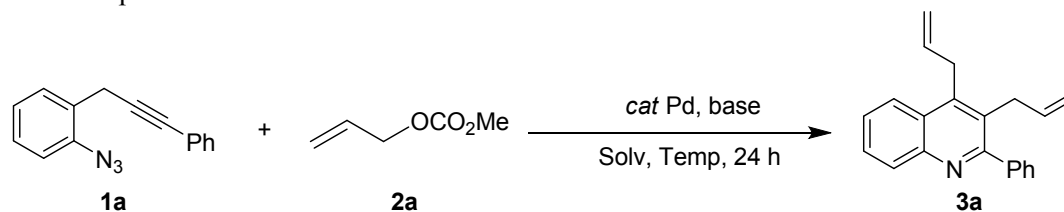

| Entry | cat Pd                                                                      | Bases                                 | Solvent                             | Yield (%) <sup>b</sup> | SM recov. (%) <sup>b</sup> |
|-------|-----------------------------------------------------------------------------|---------------------------------------|-------------------------------------|------------------------|----------------------------|
| 1     | -                                                                           | K <sub>3</sub> CO <sub>3</sub>        | DMF                                 | 0                      | 0                          |
| 2     | Pd <sub>2</sub> (dba) <sub>3</sub> ·CHCl <sub>3</sub> (5 mol%)              | K <sub>3</sub> CO <sub>3</sub>        | DMF                                 | 4                      | 0                          |
| 3     | Pd <sub>2</sub> (dba) <sub>3</sub> ·CHCl <sub>3</sub> <sup>c</sup> (5 mol%) | K <sub>3</sub> CO <sub>3</sub>        | DMF                                 | 8                      | 0                          |
| 4     | Pd <sub>2</sub> (dba) <sub>3</sub> ·CHCl <sub>3</sub> <sup>d</sup> (5 mol%) | K <sub>3</sub> CO <sub>3</sub>        | DMF                                 | 35                     | 0                          |
| 5     | Pd(PPh <sub>3</sub> ) <sub>4</sub>                                          | -                                     | DMF                                 | 26                     | 0                          |
| 6     | Pd(PPh <sub>3</sub> ) <sub>4</sub>                                          | K <sub>2</sub> CO <sub>3</sub>        | DMF                                 | (47) <sup>e</sup>      | 0                          |
| 7     | Pd(PPh <sub>3</sub> ) <sub>4</sub>                                          | Na <sub>2</sub> CO <sub>3</sub>       | DMF                                 | 42                     | 0                          |
| 8     | Pd(PPh <sub>3</sub> ) <sub>4</sub>                                          | NaHCO <sub>3</sub>                    | DMF                                 | 46                     | 0                          |
| 9     | Pd(PPh <sub>3</sub> ) <sub>4</sub>                                          | NaOH                                  | DMF                                 | 56                     | 0                          |
| 10    | Pd(PPh <sub>3</sub> ) <sub>4</sub>                                          | NaOAc                                 | DMF                                 | 66                     | 0                          |
| 11    | Pd(PPh <sub>3</sub> ) <sub>4</sub>                                          | K <sub>3</sub> PO <sub>4</sub>        | DMF                                 | 75 (69) <sup>e</sup>   | 0                          |
| 12    | Pd(PPh <sub>3</sub> ) <sub>4</sub>                                          | KH <sub>2</sub> PO <sub>4</sub>       | DMF                                 | 37                     | 0                          |
| 13    | Pd(PPh <sub>3</sub> ) <sub>4</sub>                                          | Et <sub>3</sub> N                     | DMF                                 | 48                     | 0                          |
| 14    | Pd(PPh <sub>3</sub> ) <sub>4</sub>                                          | K <sub>3</sub> PO <sub>4</sub>        | 1,4-dioxane                         | 27                     | 5                          |
| 15    | Pd(PPh <sub>3</sub> ) <sub>4</sub>                                          | K <sub>3</sub> PO <sub>4</sub>        | AcOEt                               | 29                     | 8                          |
| 16    | Pd(PPh <sub>3</sub> ) <sub>4</sub>                                          | K <sub>3</sub> PO <sub>4</sub>        | Benzene                             | 26                     | 11                         |
| 17    | Pd(PPh <sub>3</sub> ) <sub>4</sub>                                          | K <sub>3</sub> PO <sub>4</sub>        | CH <sub>3</sub> CN                  | 66                     | 0                          |
| 18    | Pd(PPh <sub>3</sub> ) <sub>4</sub>                                          | K <sub>3</sub> PO <sub>4</sub>        | CH <sub>3</sub> CN+H <sub>2</sub> O | 15                     | 0                          |
| 19    | Pd(PPh <sub>3</sub> ) <sub>4</sub>                                          | K <sub>3</sub> PO <sub>4</sub>        | THF                                 | 30                     | 8                          |
| 20    | Pd(PPh <sub>3</sub> ) <sub>4</sub> <sup>f</sup>                             | K <sub>3</sub> PO <sub>4</sub>        | DMF                                 | 69 (60) <sup>e</sup>   | 0                          |
| 21    | Pd(PPh <sub>3</sub> ) <sub>4</sub> (5 mol%)                                 | K <sub>3</sub> PO <sub>4</sub>        | DMF                                 | 63                     | 0                          |
| 22    | Pd(PPh <sub>3</sub> ) <sub>4</sub>                                          | K <sub>3</sub> PO <sub>4</sub> (3 eq) | DMF                                 | 65 (59) <sup>e</sup>   | 0                          |

<sup>a</sup> The reactions were performed with **1a** (0.05 mmol) and **2a** (5 eq) in the presence of Pd catalyst (10 mol%) and base (5 eq) in 1 mL DMF at 100 °C for 24 h under a argon atmosphere. <sup>b</sup> <sup>1</sup>H NMR yield was determined by using *p*-xylene as an internal standard. <sup>c</sup> 5 mol% XantPhos was used. <sup>d</sup> 10 mol% S-Phos was used. <sup>e</sup> Isolated yield is shown in parentheses. <sup>f</sup> The reaction temperature was 80 °C.

# $^1\text{H}$ NMR and $^{13}\text{C}$ NMR spectra of compounds

Aug12-2014-hzb  
264

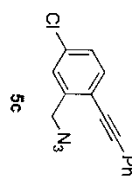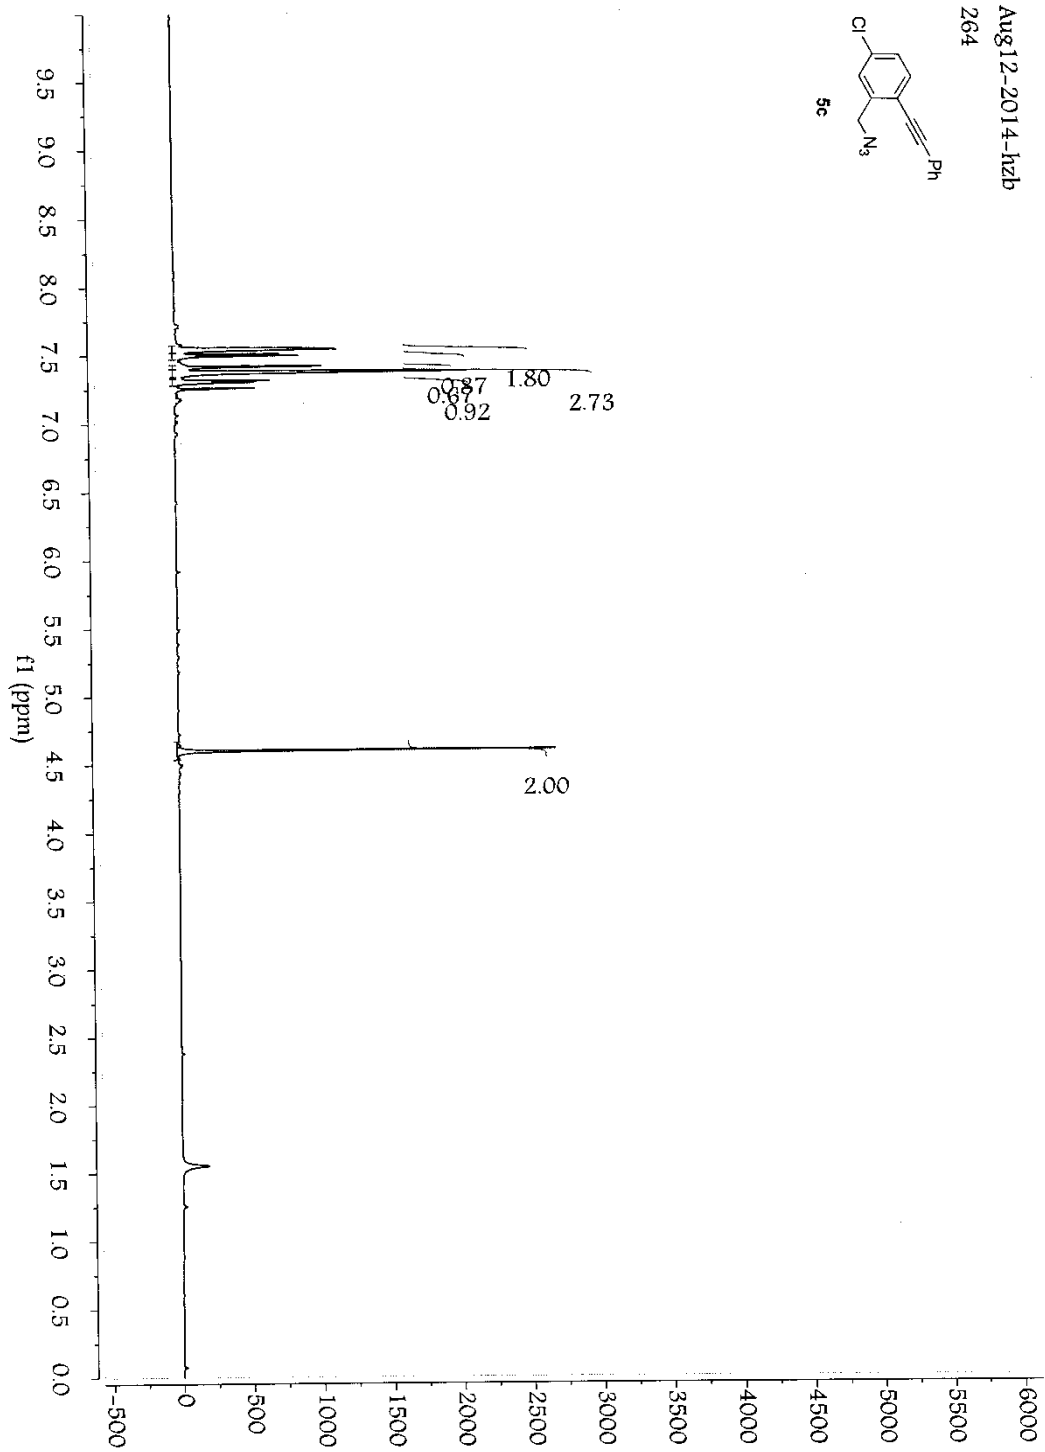

14-09-11-1j  
1aw-264-c

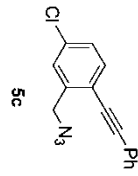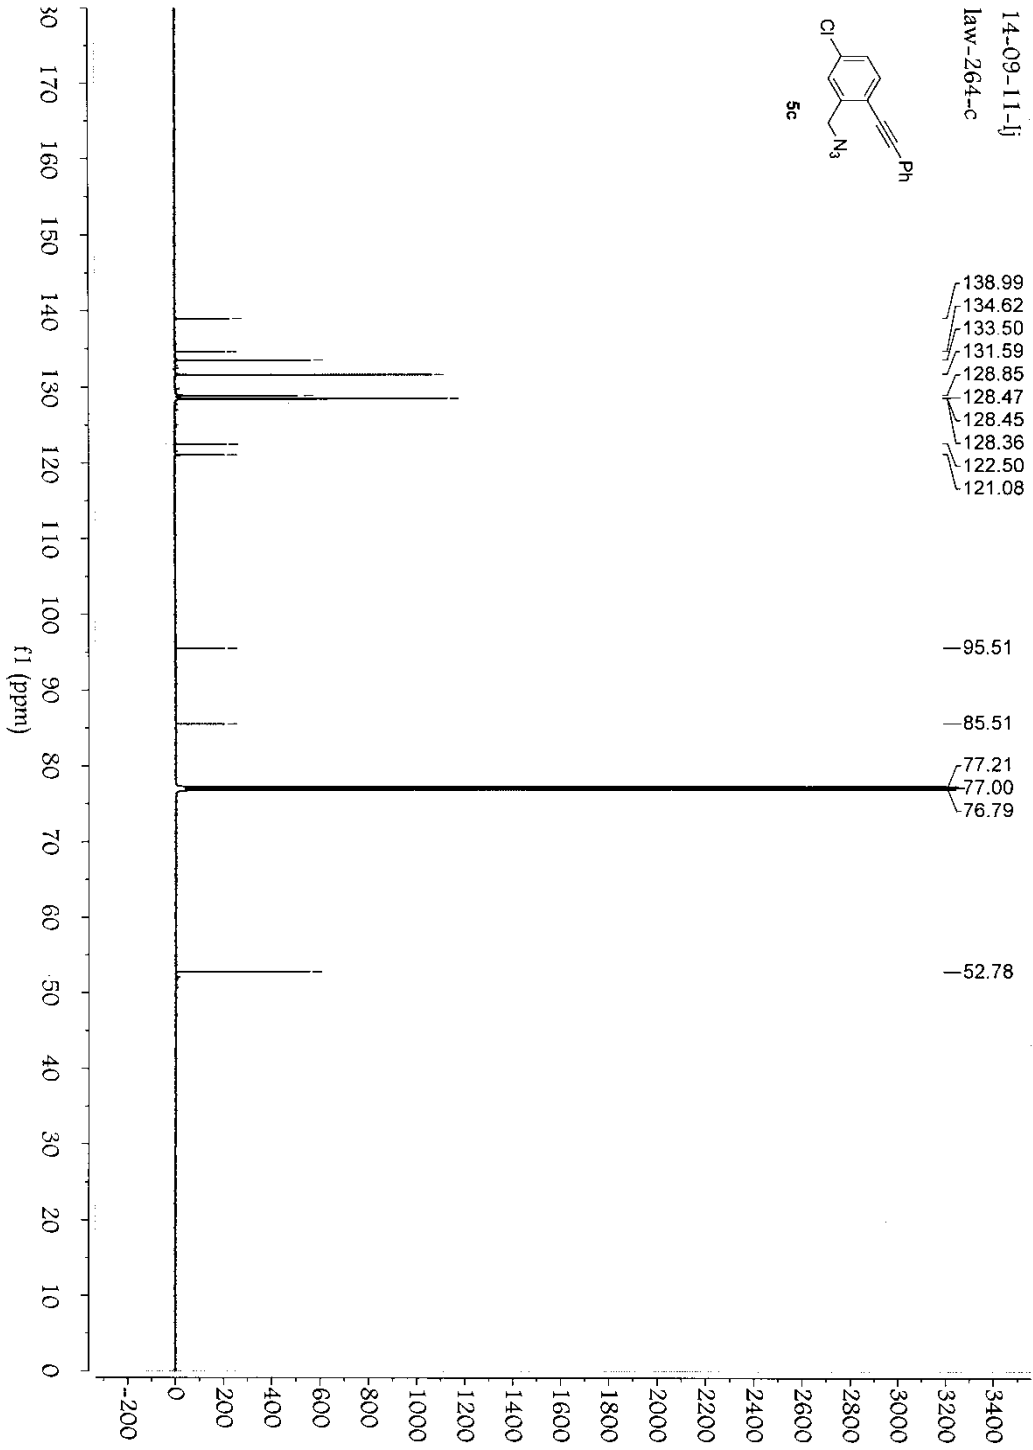

Aug15-2014-hzb  
law-273

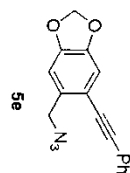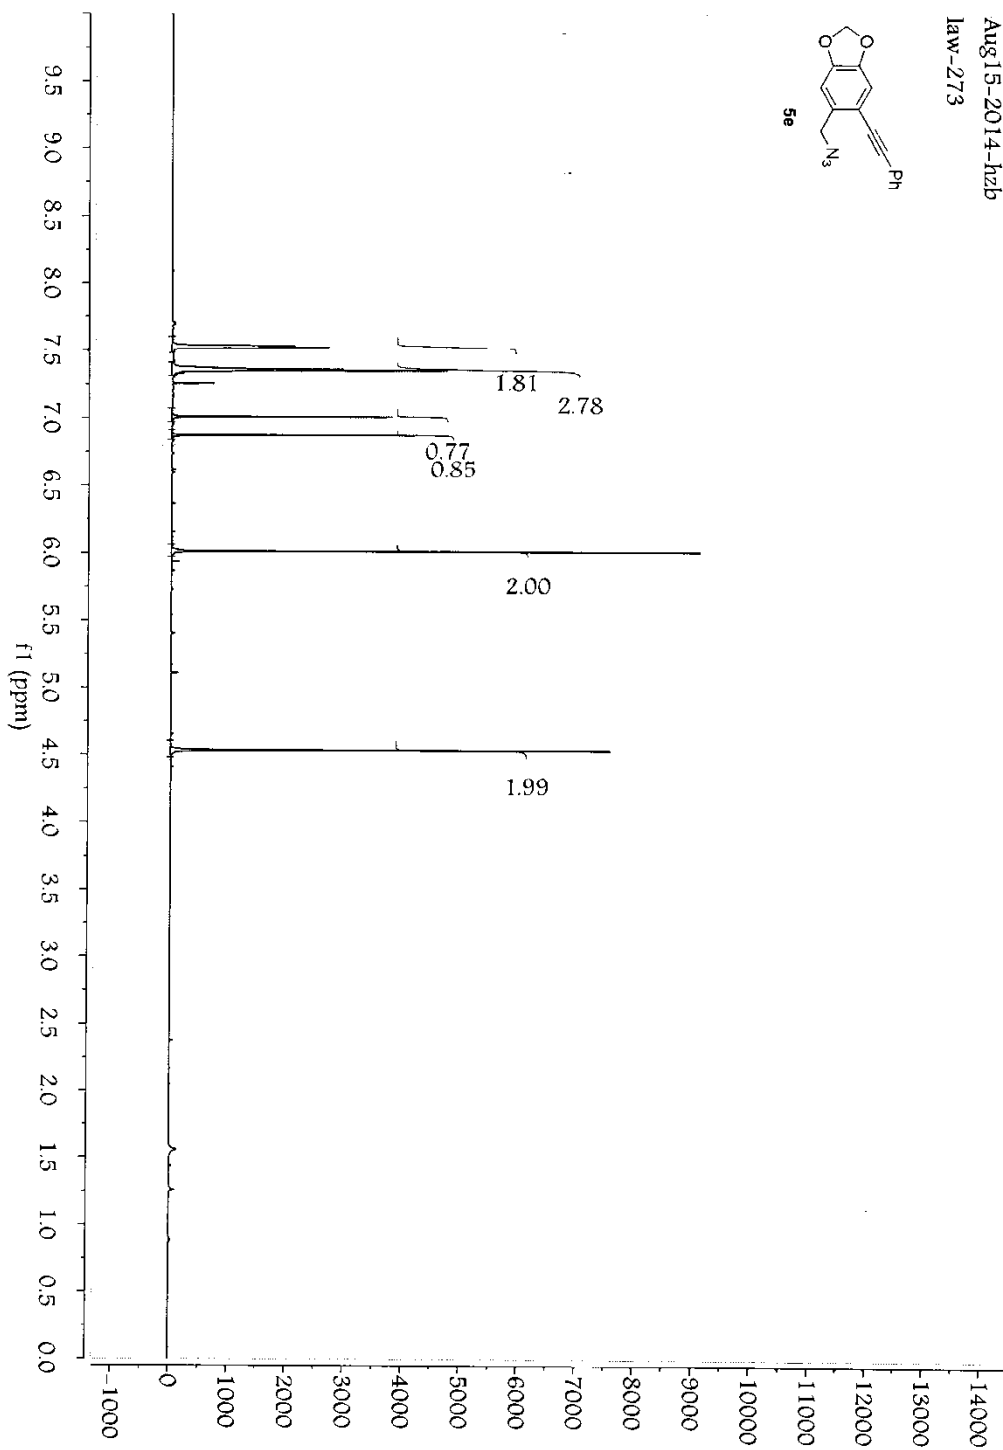

14-09-11-fj  
law-273-c

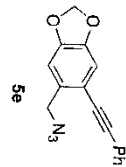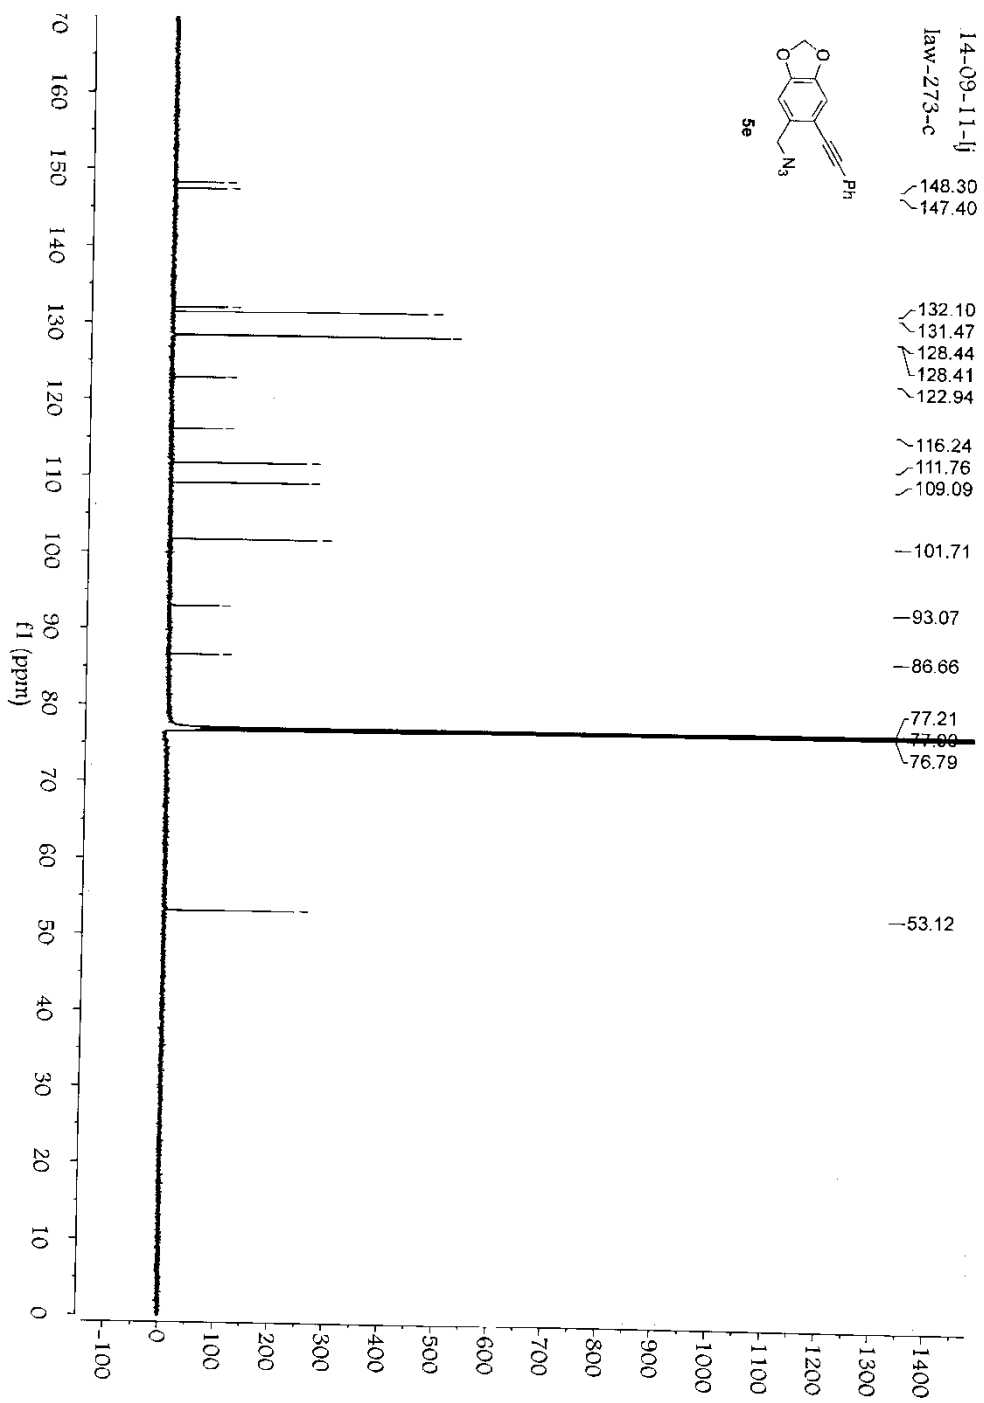

Aug15-2014-hzb  
law-274-1

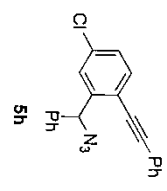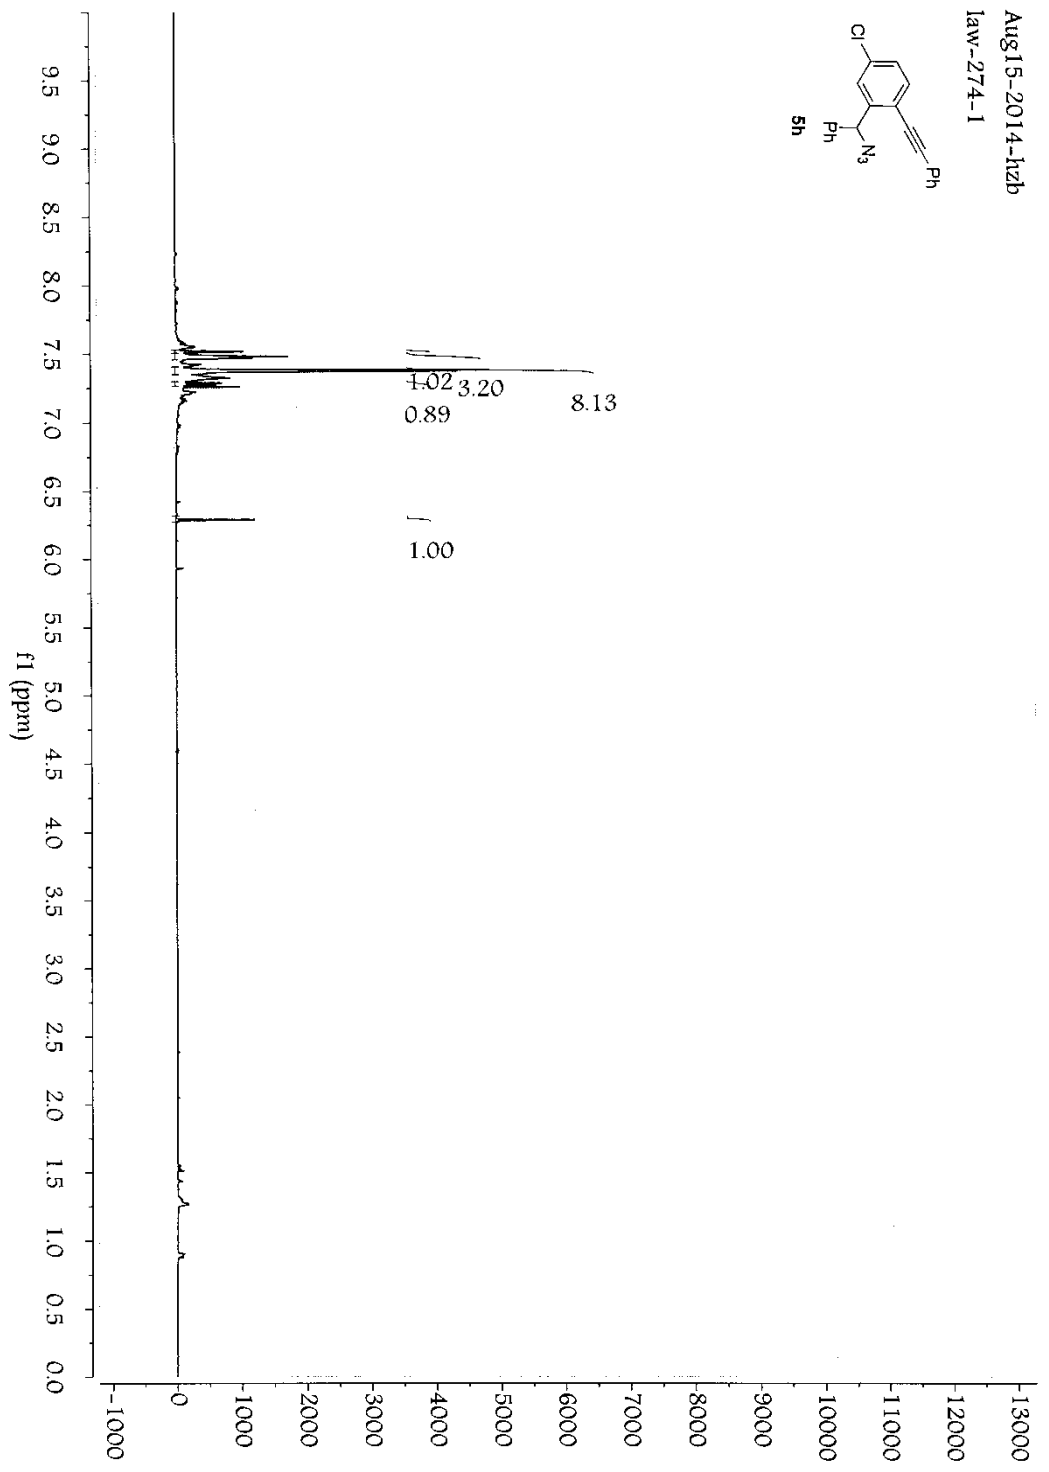

14-09-11-1j  
law-274-c

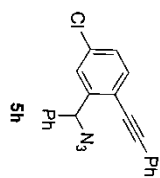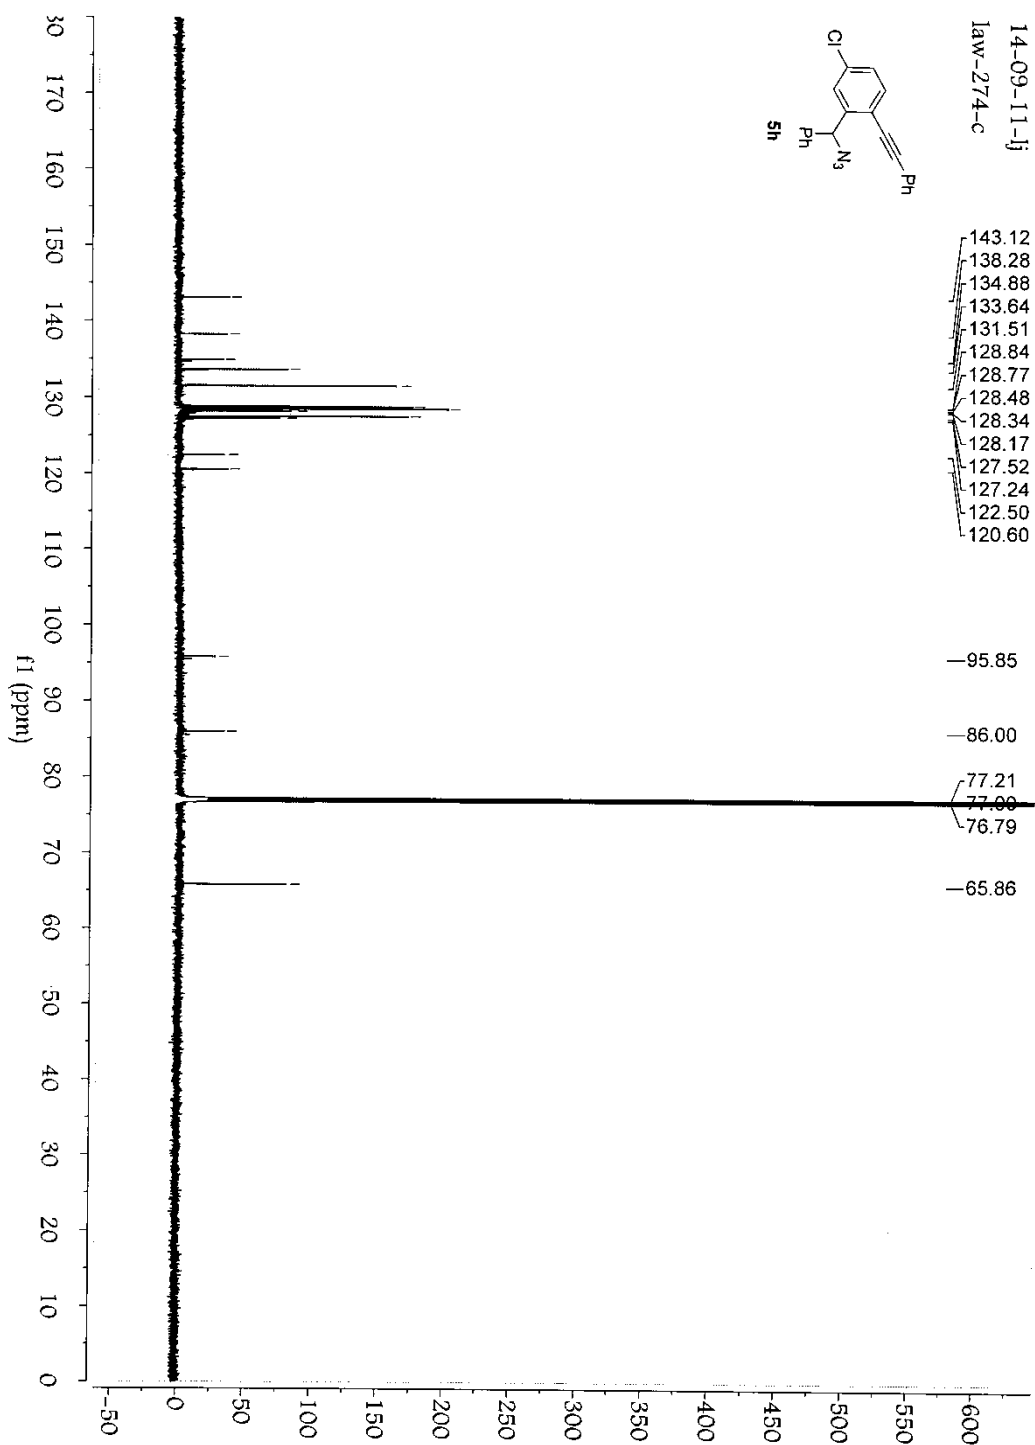



Aug29-2014-hzb  
276-n cdcl3

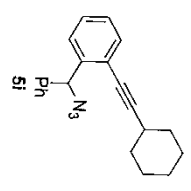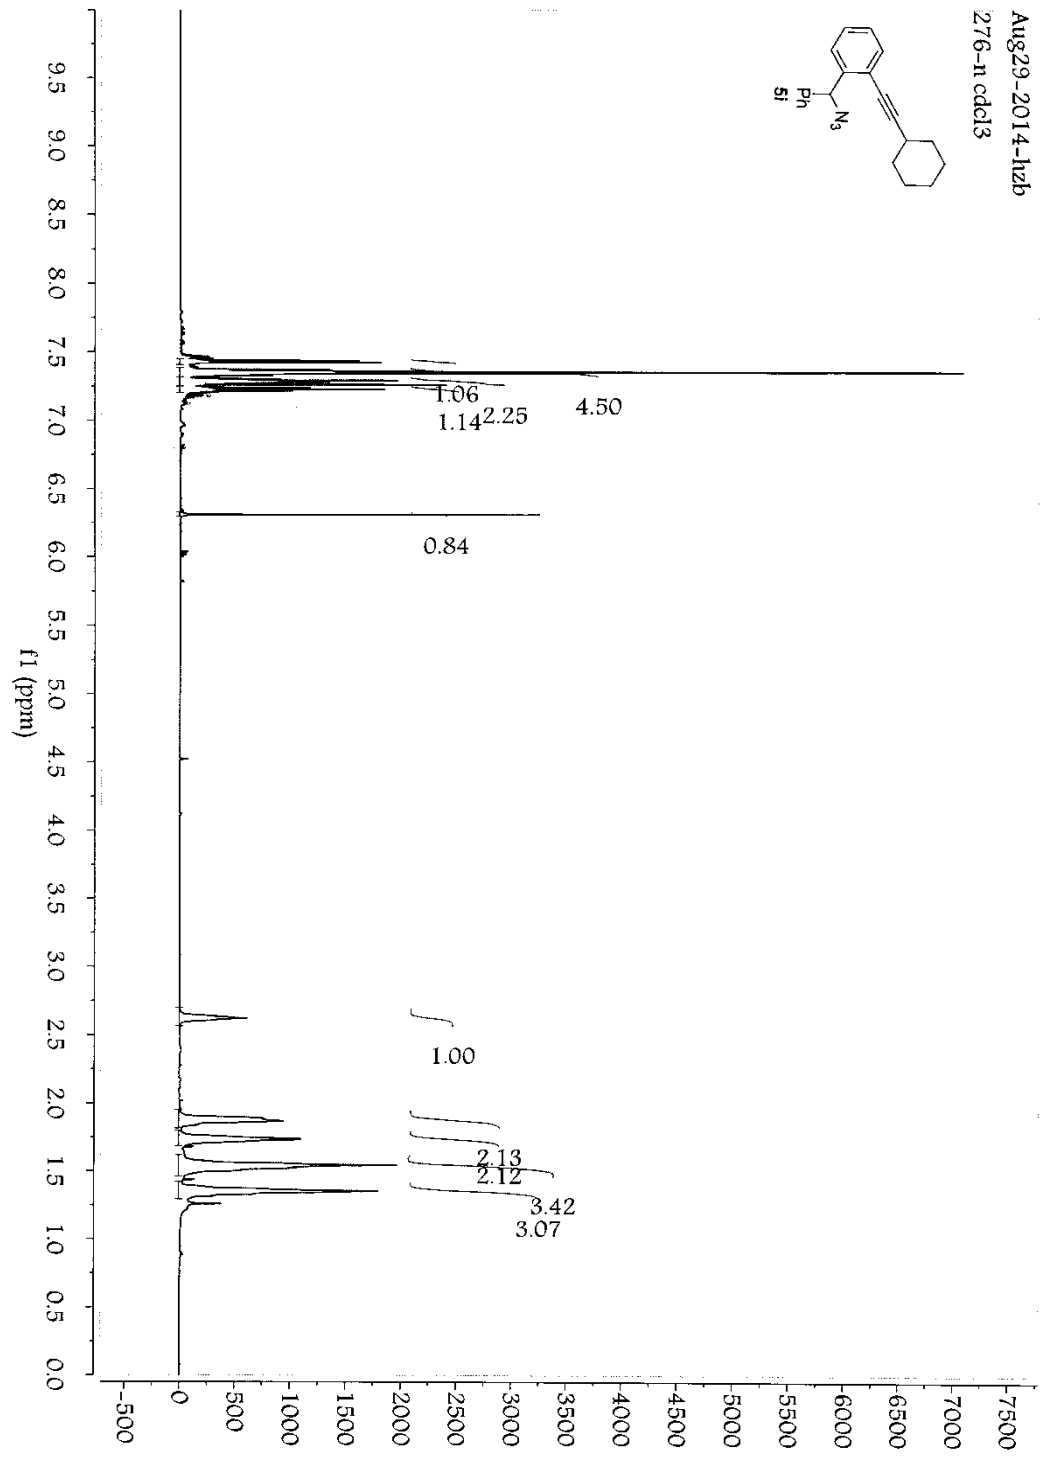

14-09-11-1j  
law-276-c

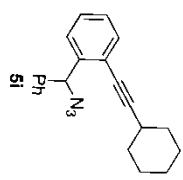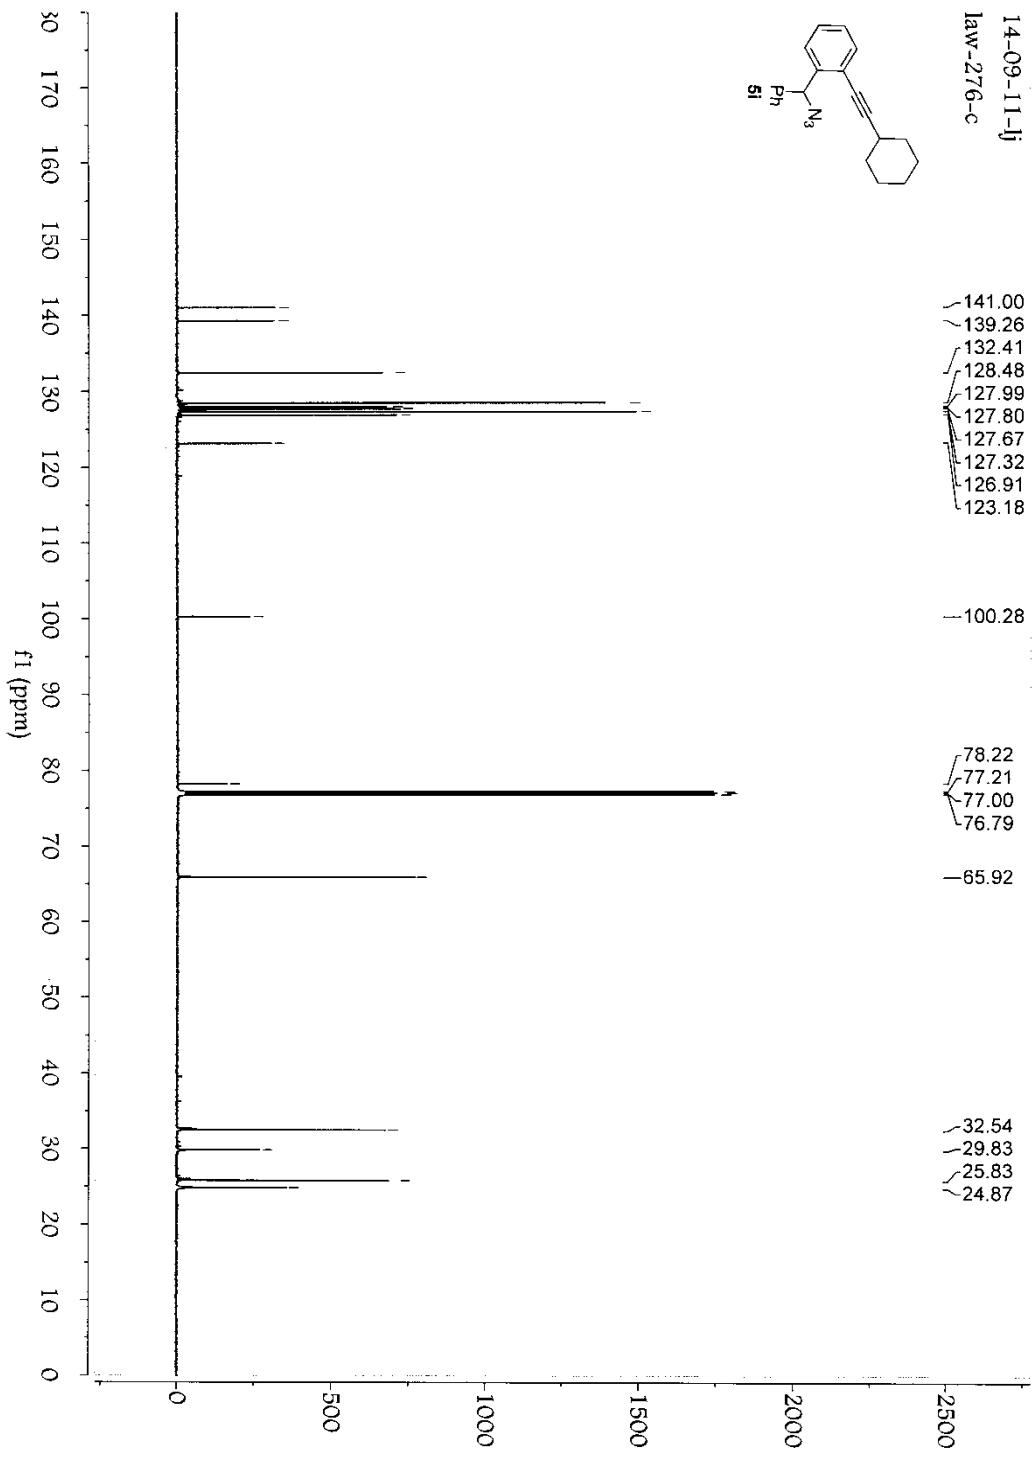

Jan09-2015-hzpb  
law-298

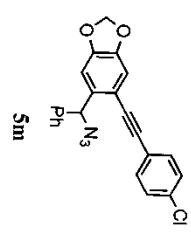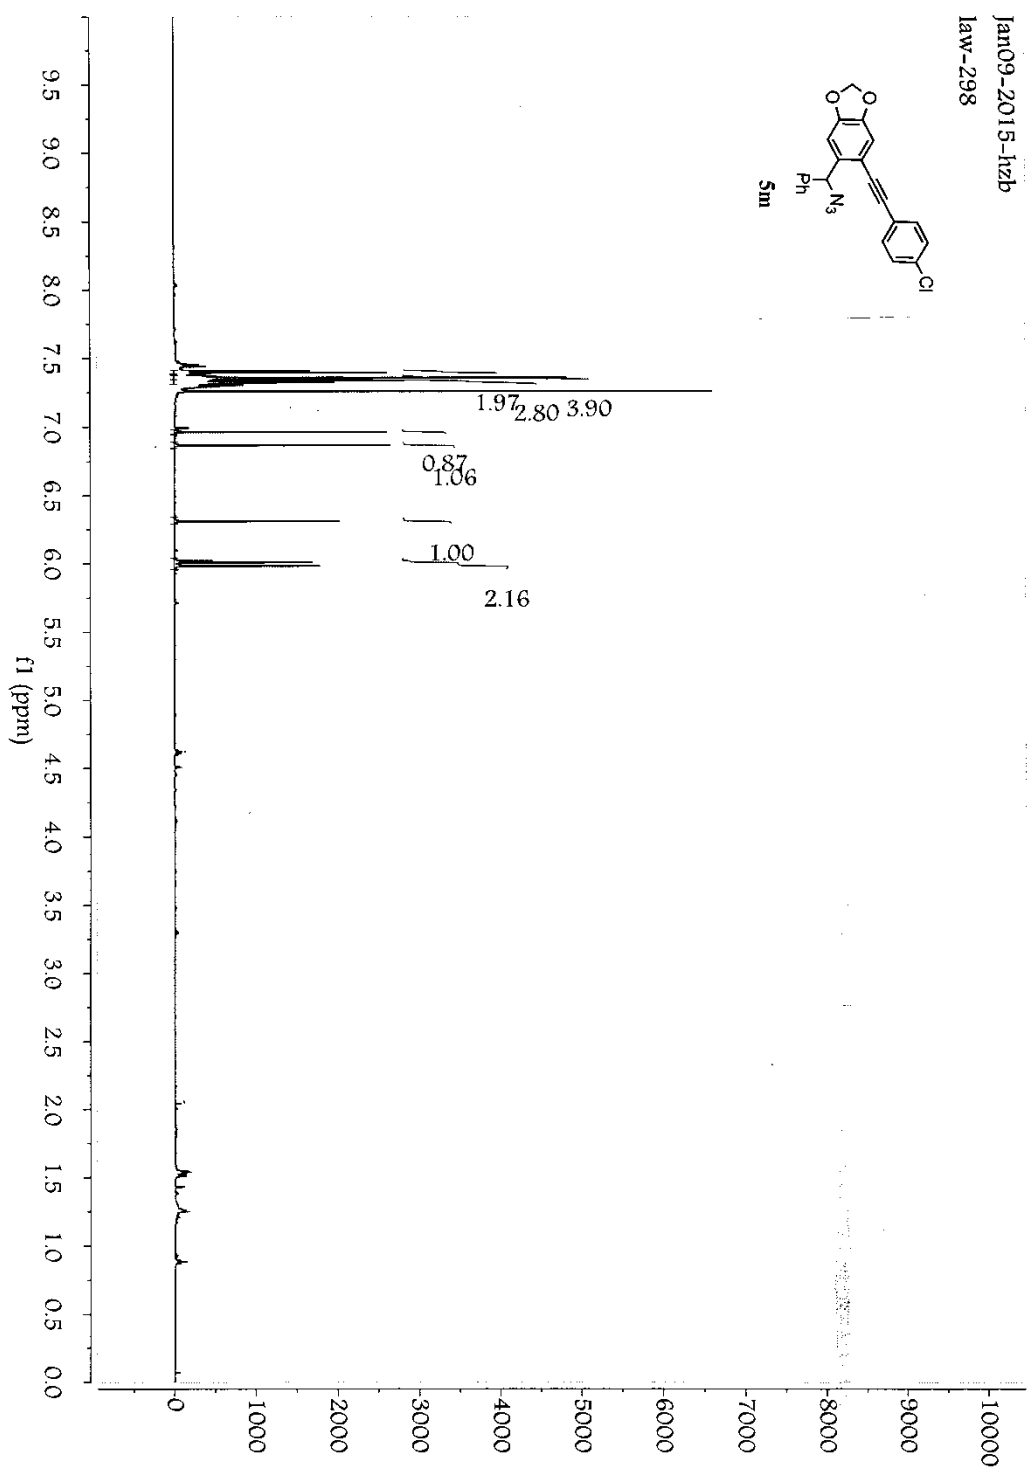

Jan09-2015-hzb  
law-298-c

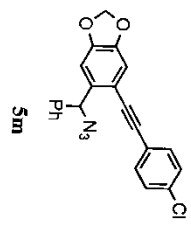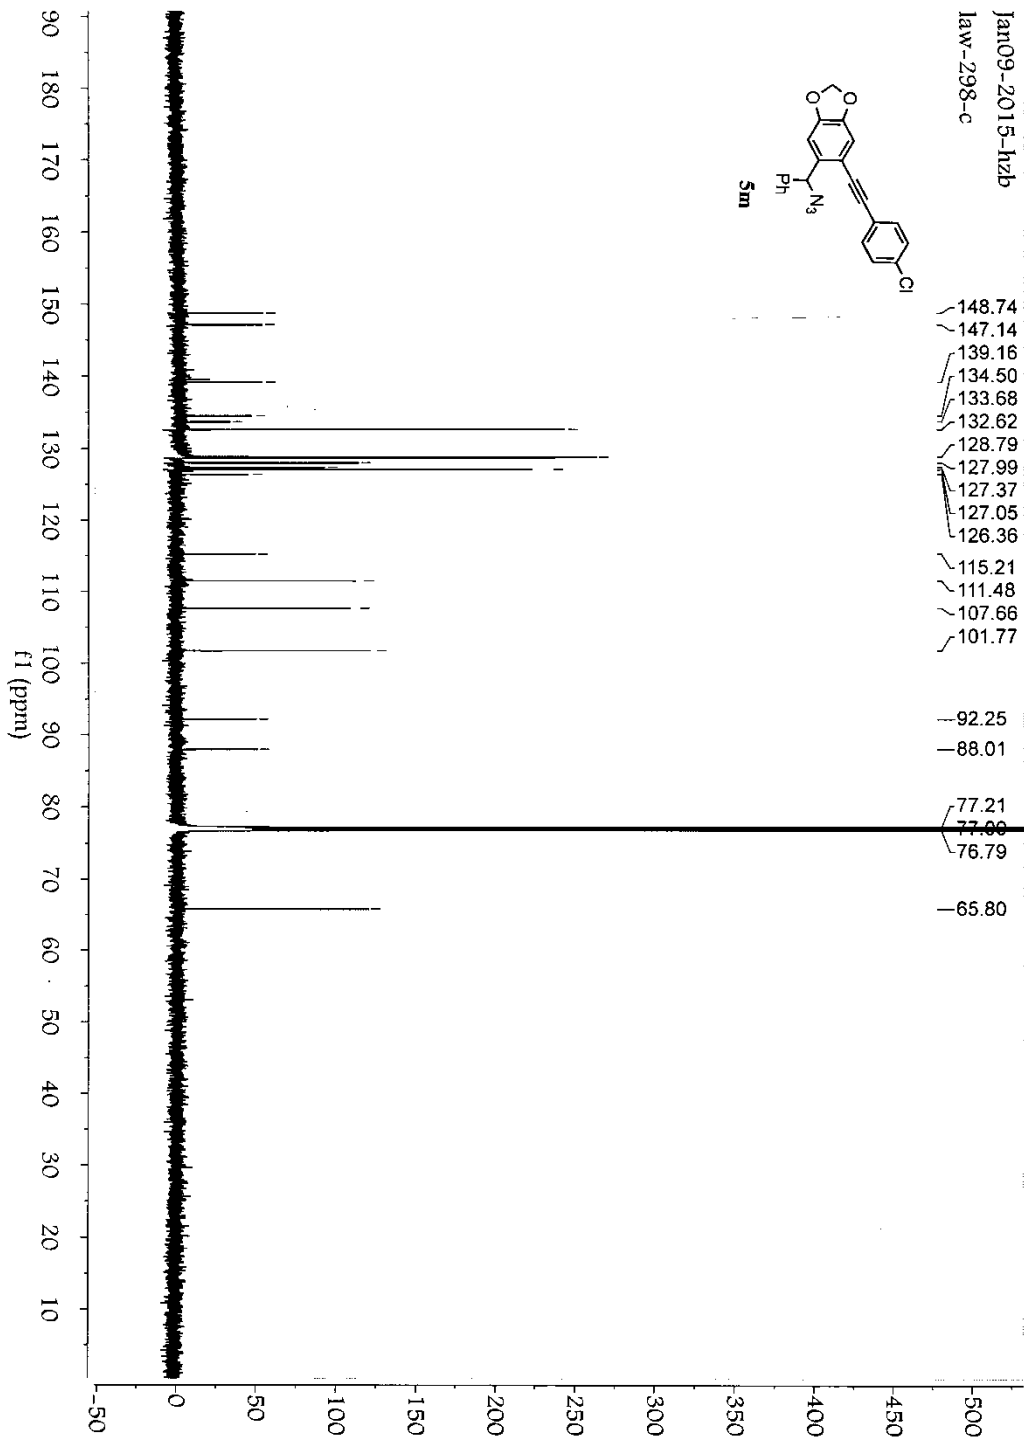

Jan05-2015-hzpb  
LAW-283

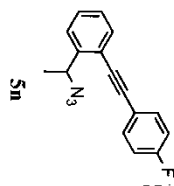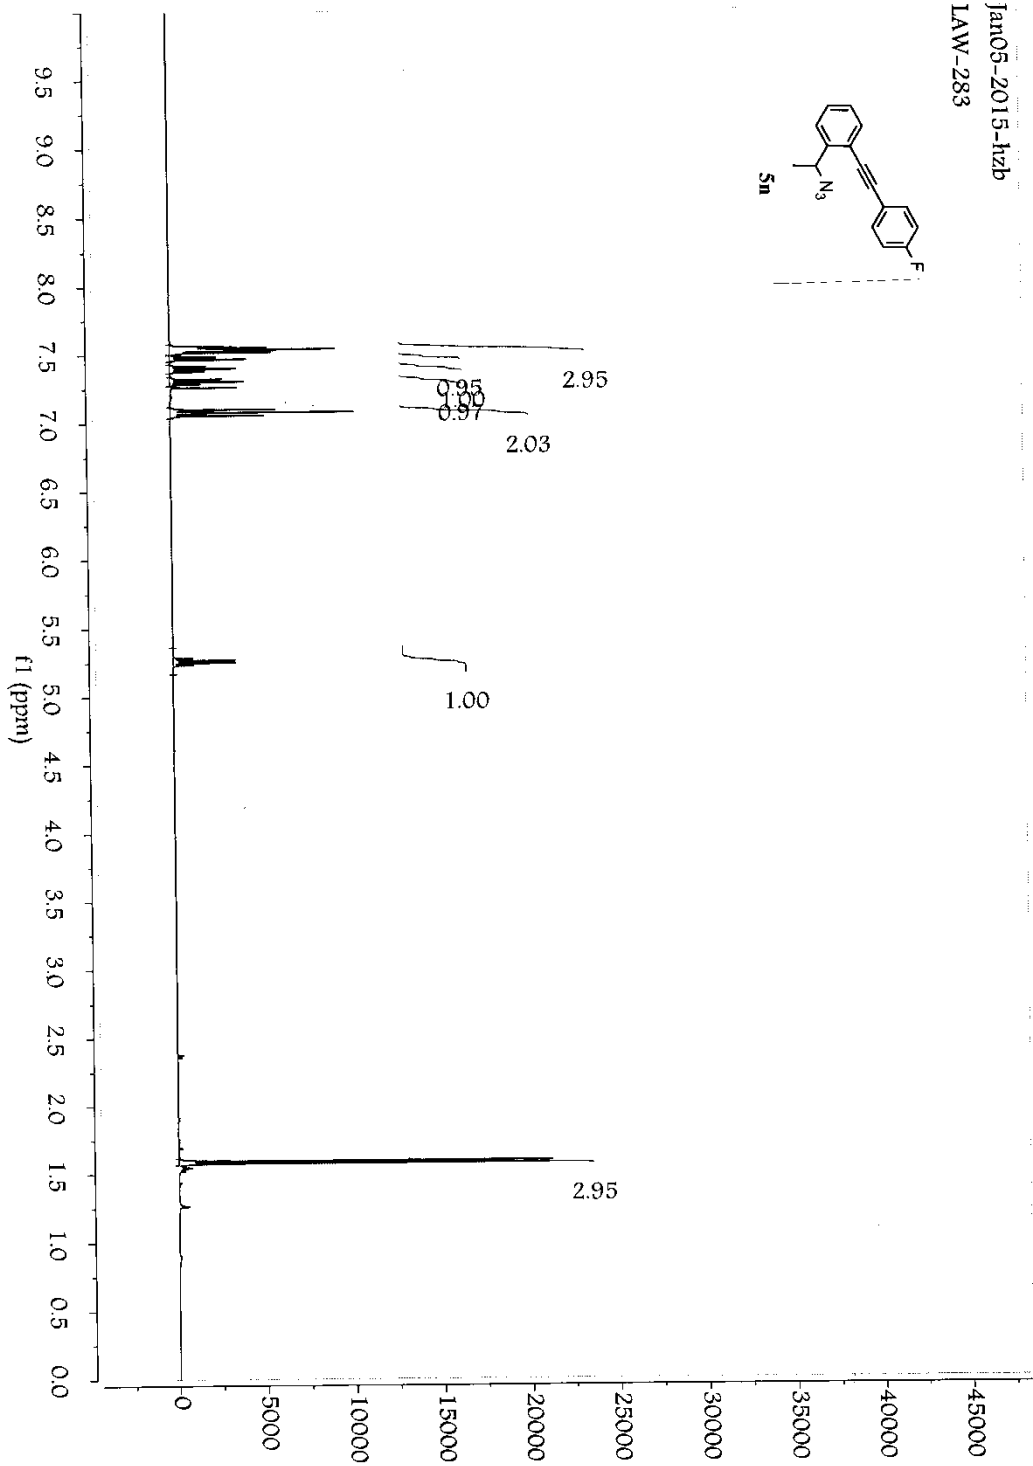



Jan13-2015-huozhibao-lj  
299 293k cdcl3 1h

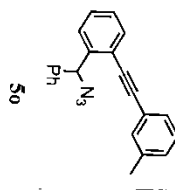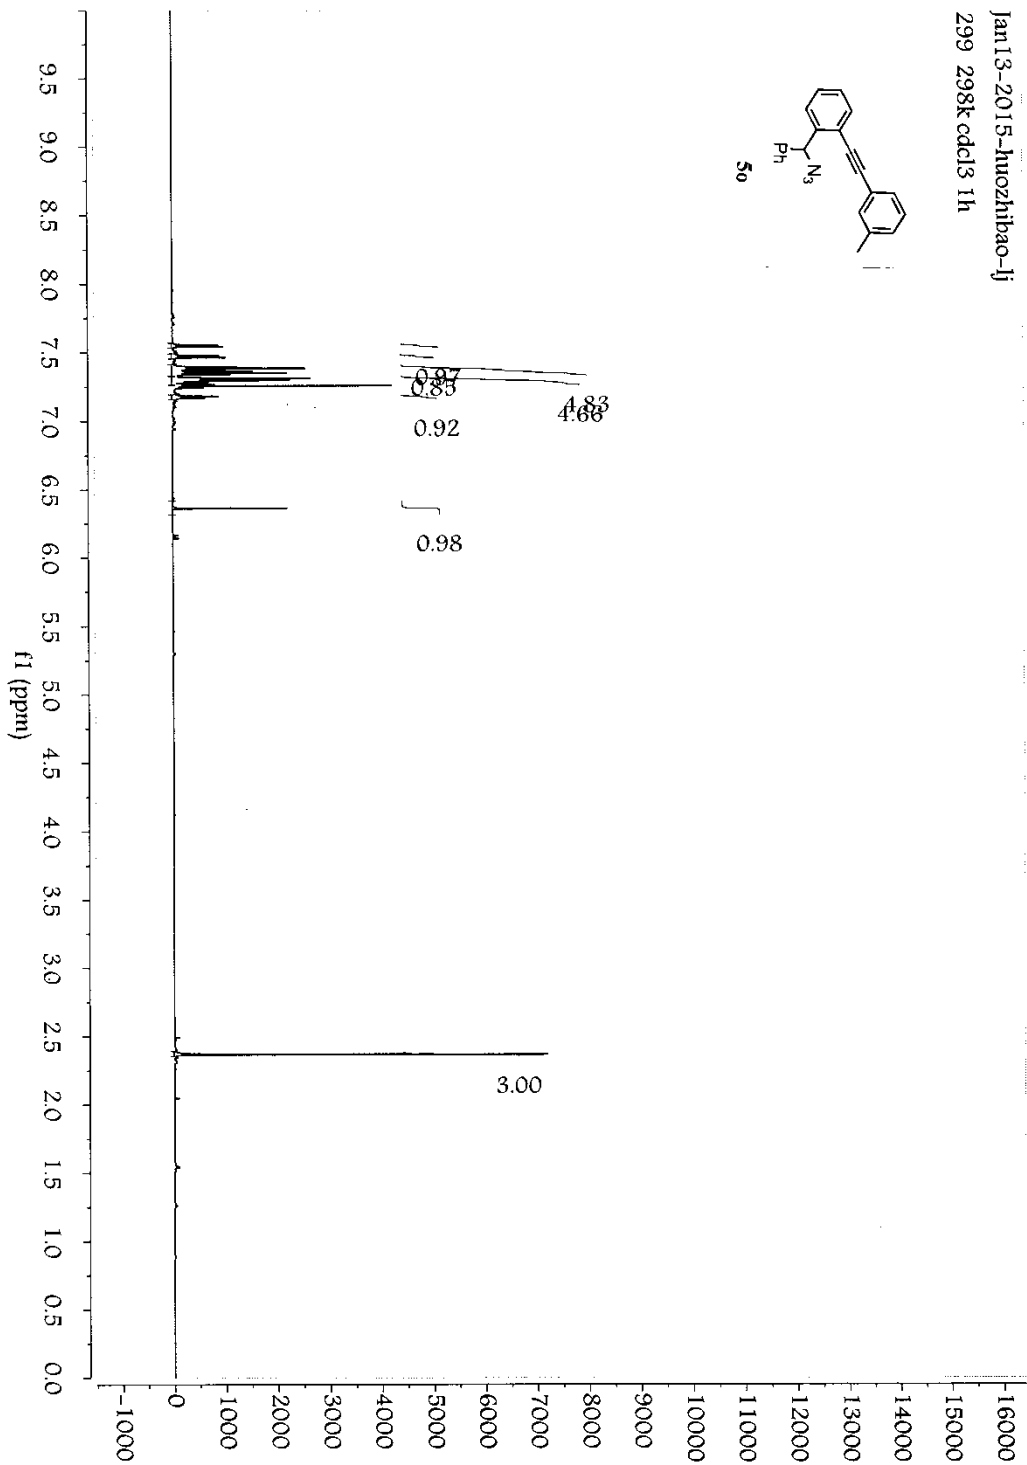

Jan13-2015-huozhibao-1j  
299 298k cdcl3 13C

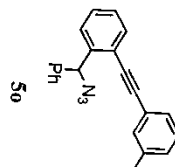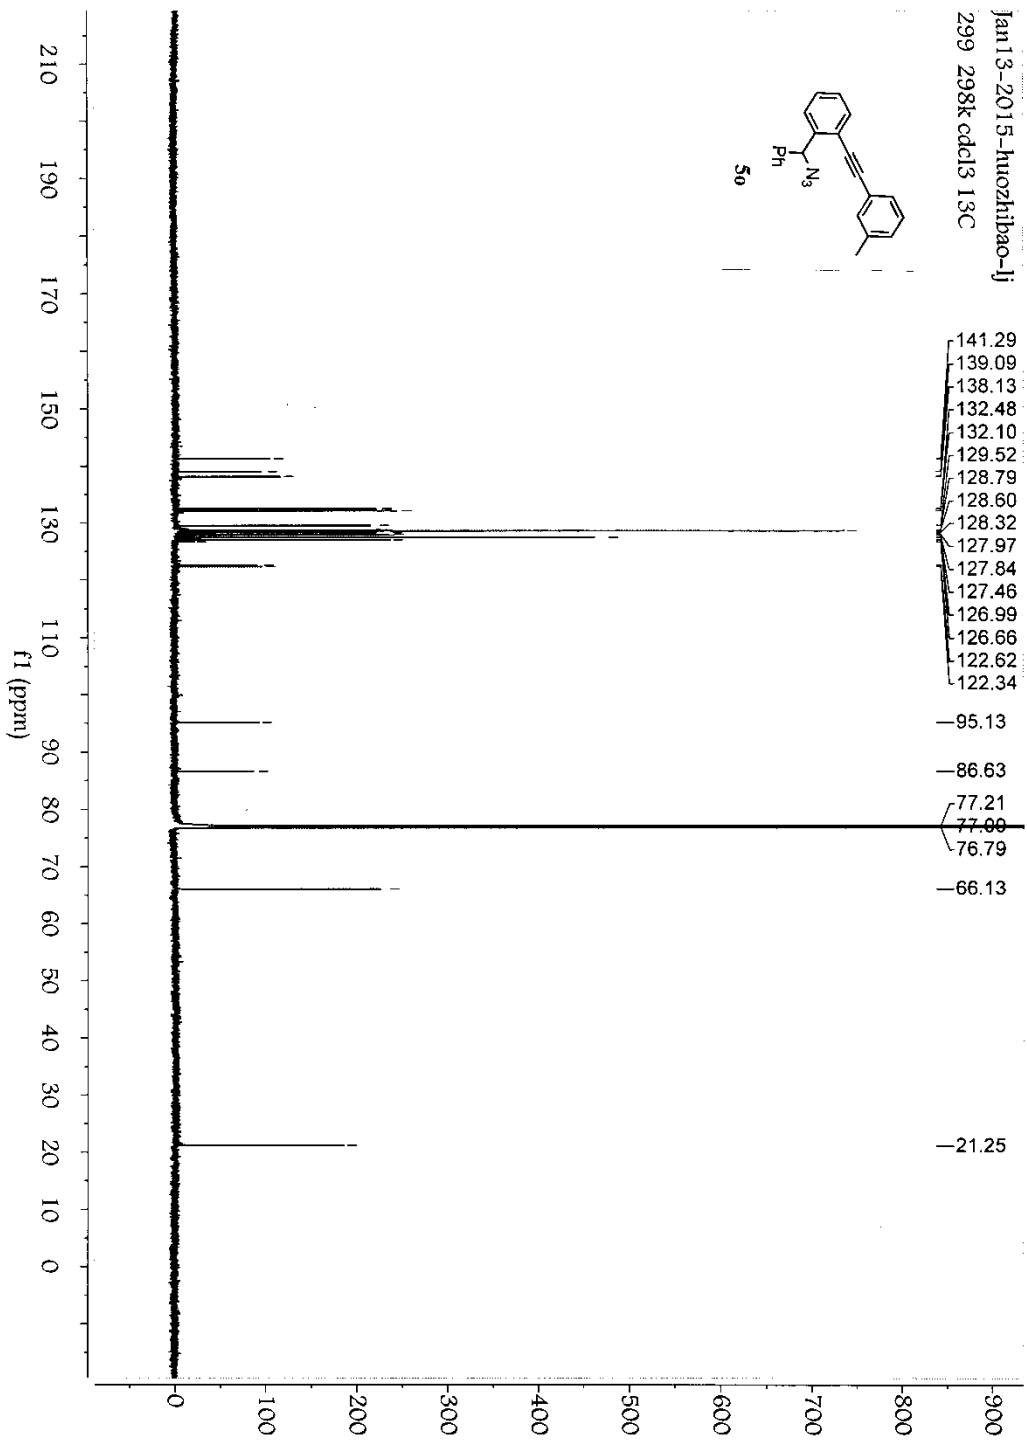



May03-2013-hzb  
law-204

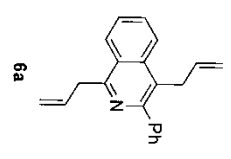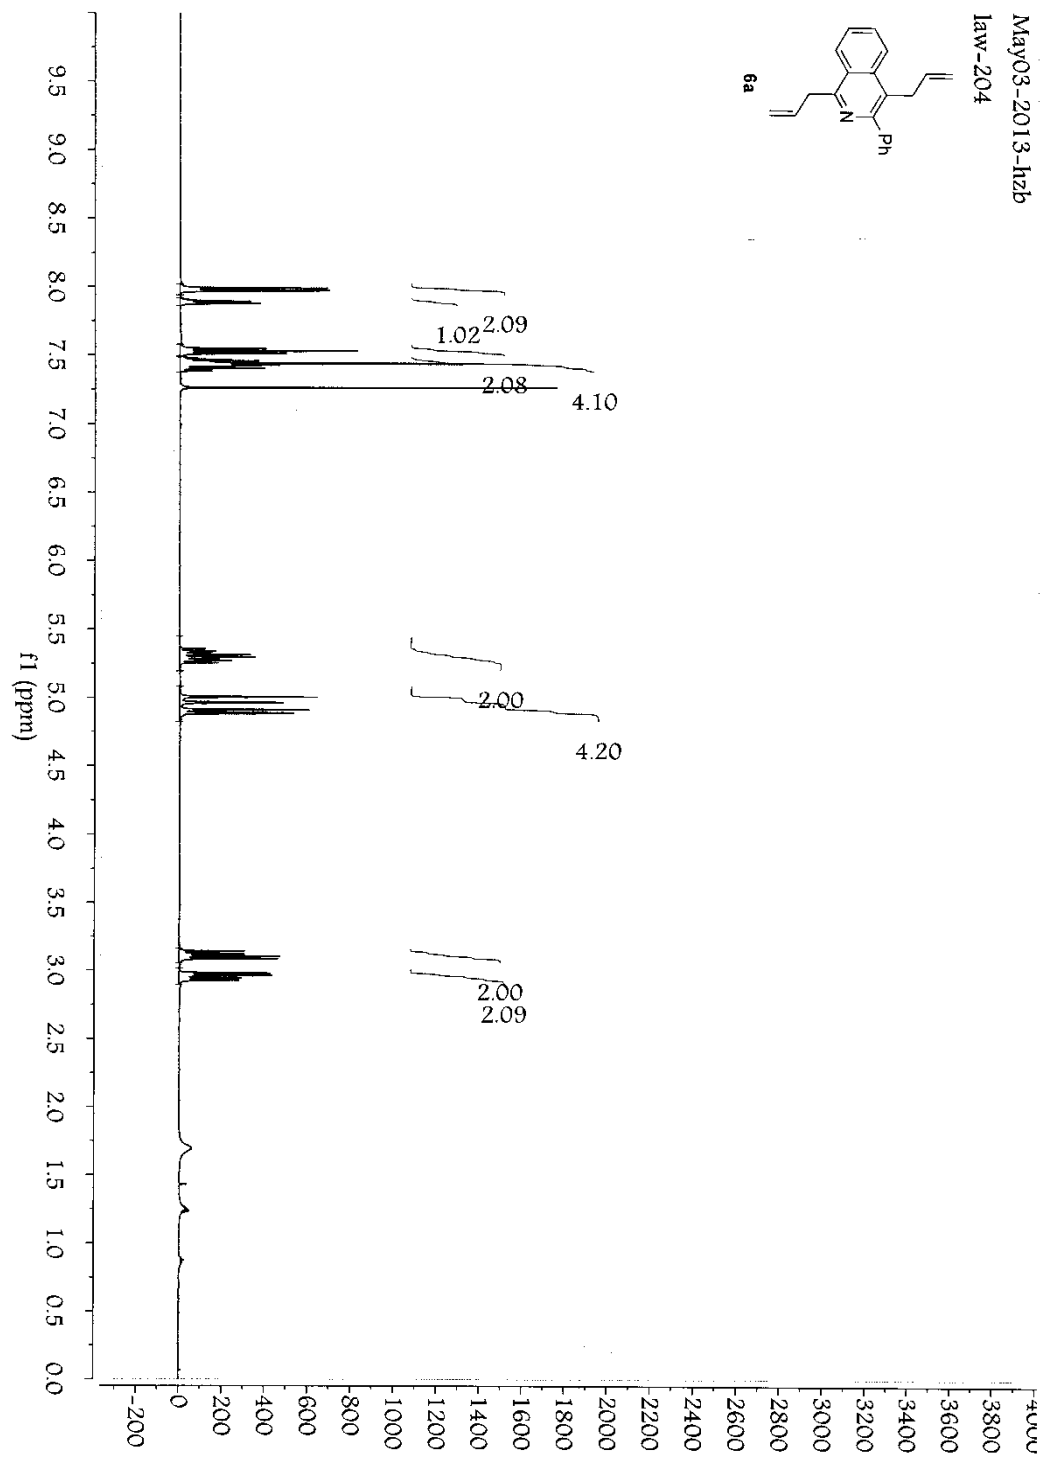

May03-2013-lzlh  
law-204-c

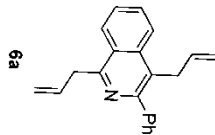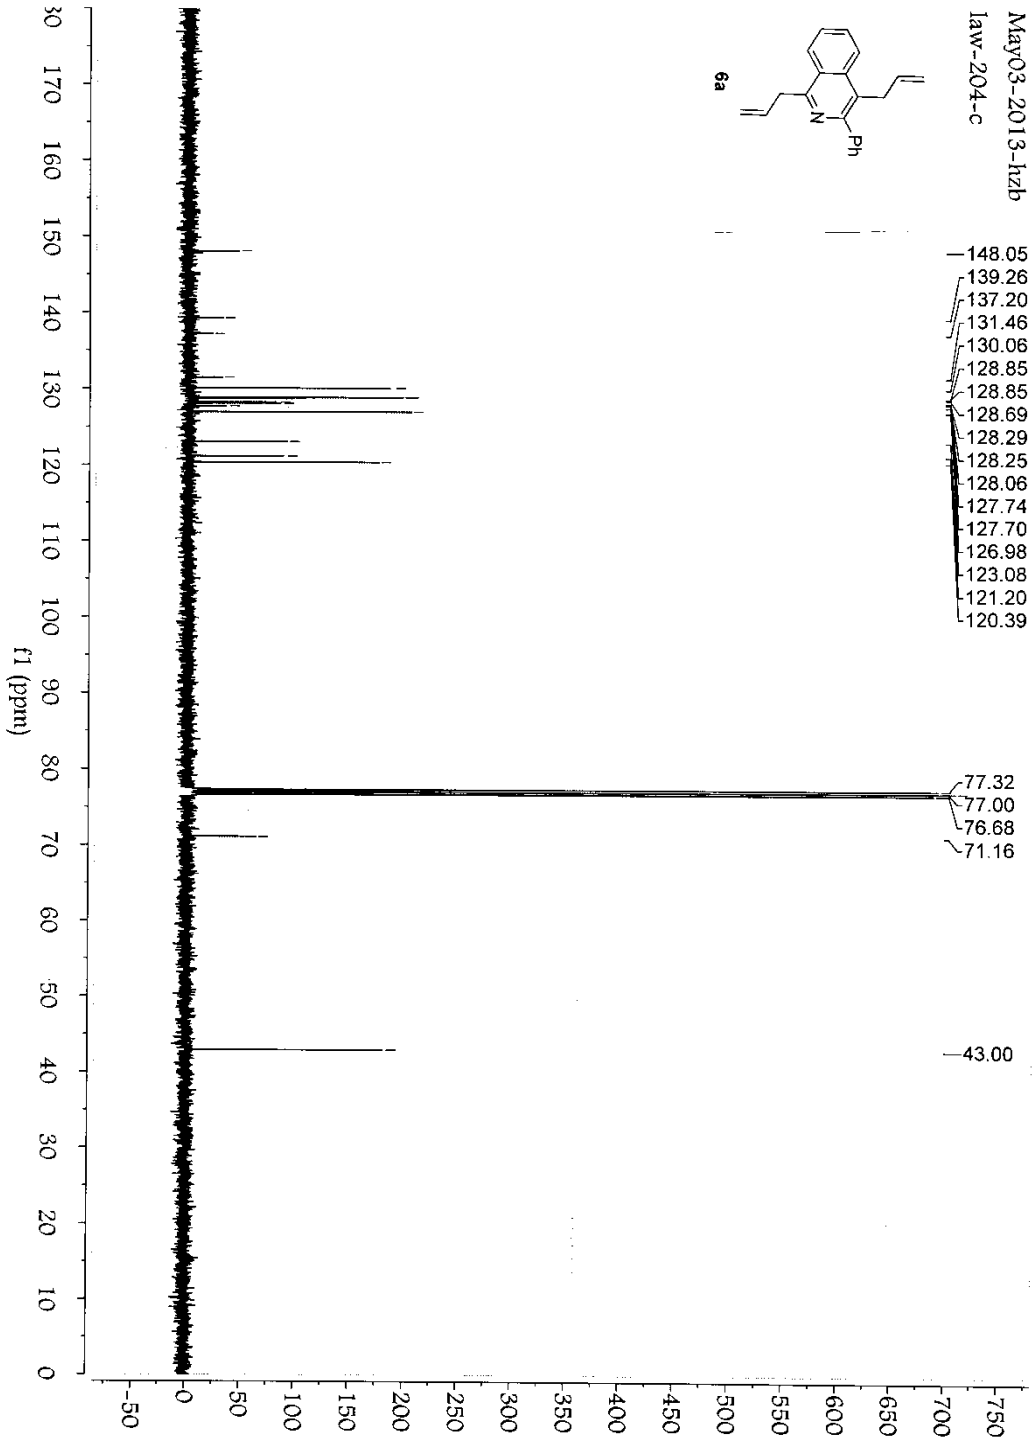

Aug15-2014-hzb  
law-256-p

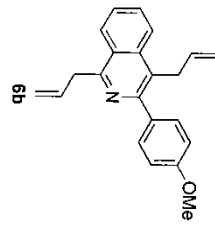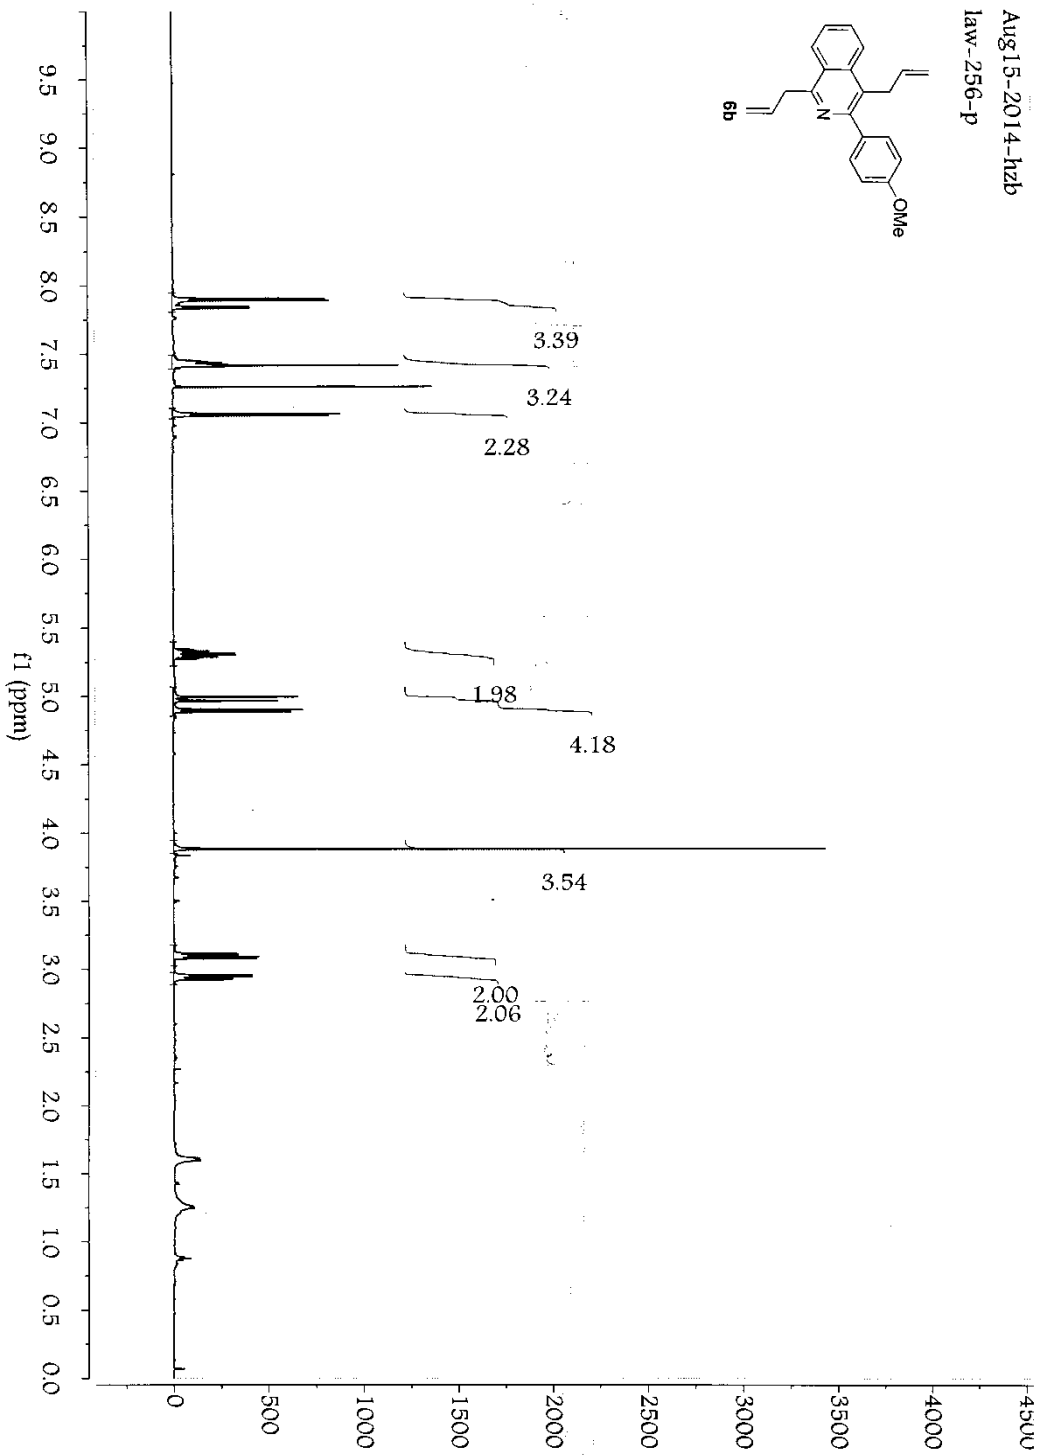

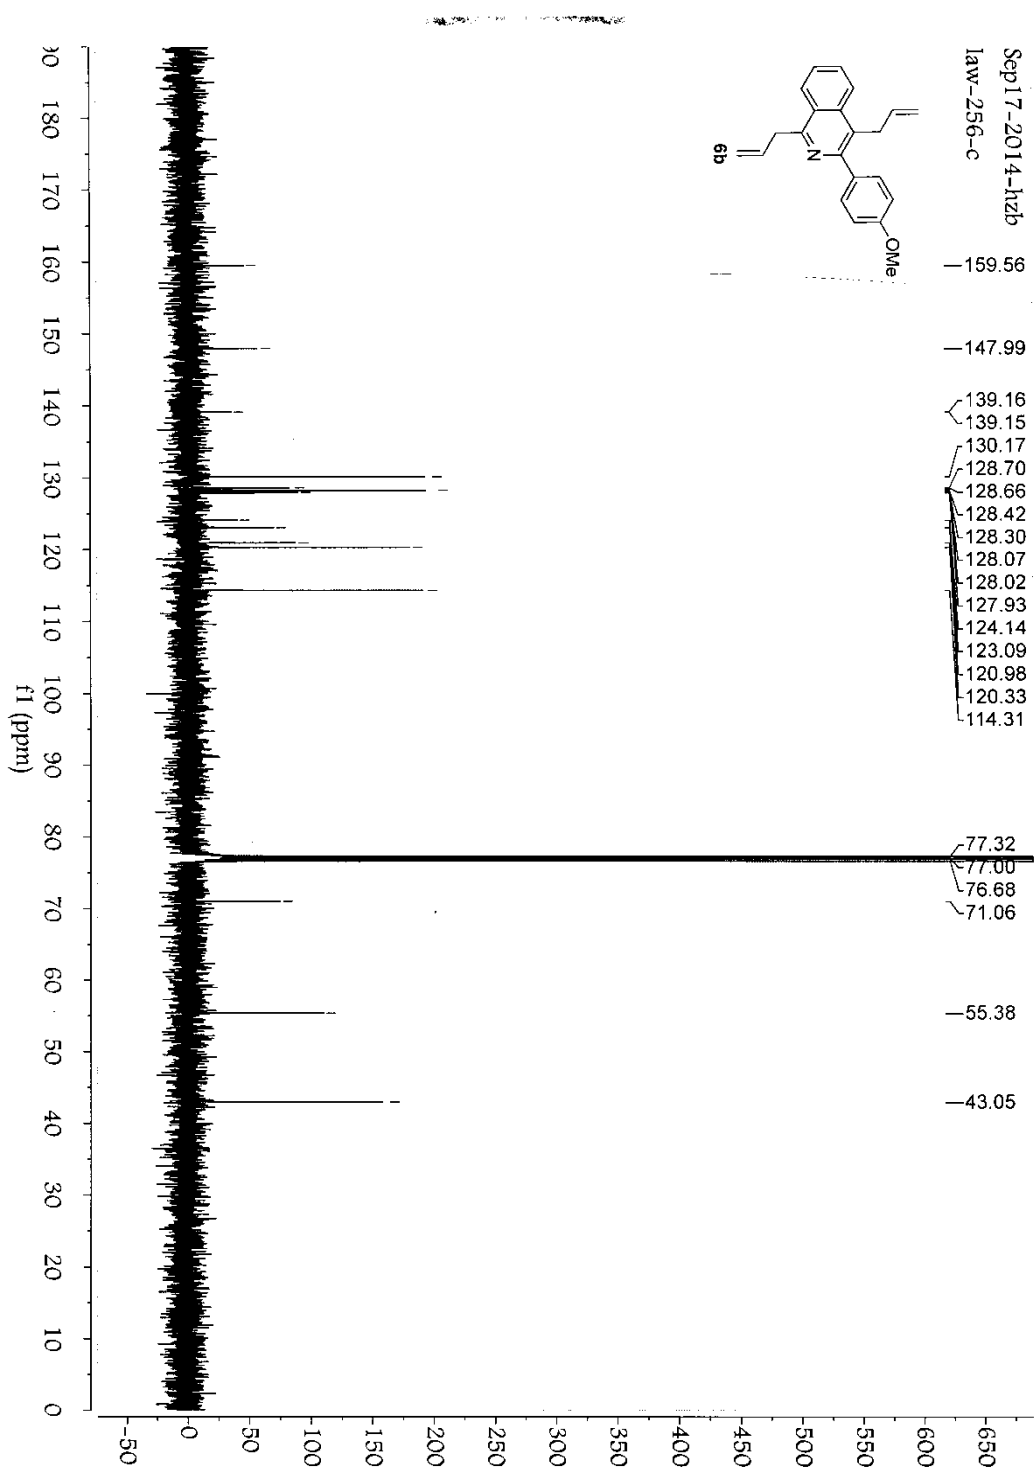

Aug29-2014-hzb  
280 cdcl3

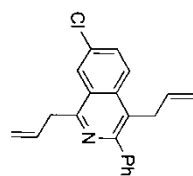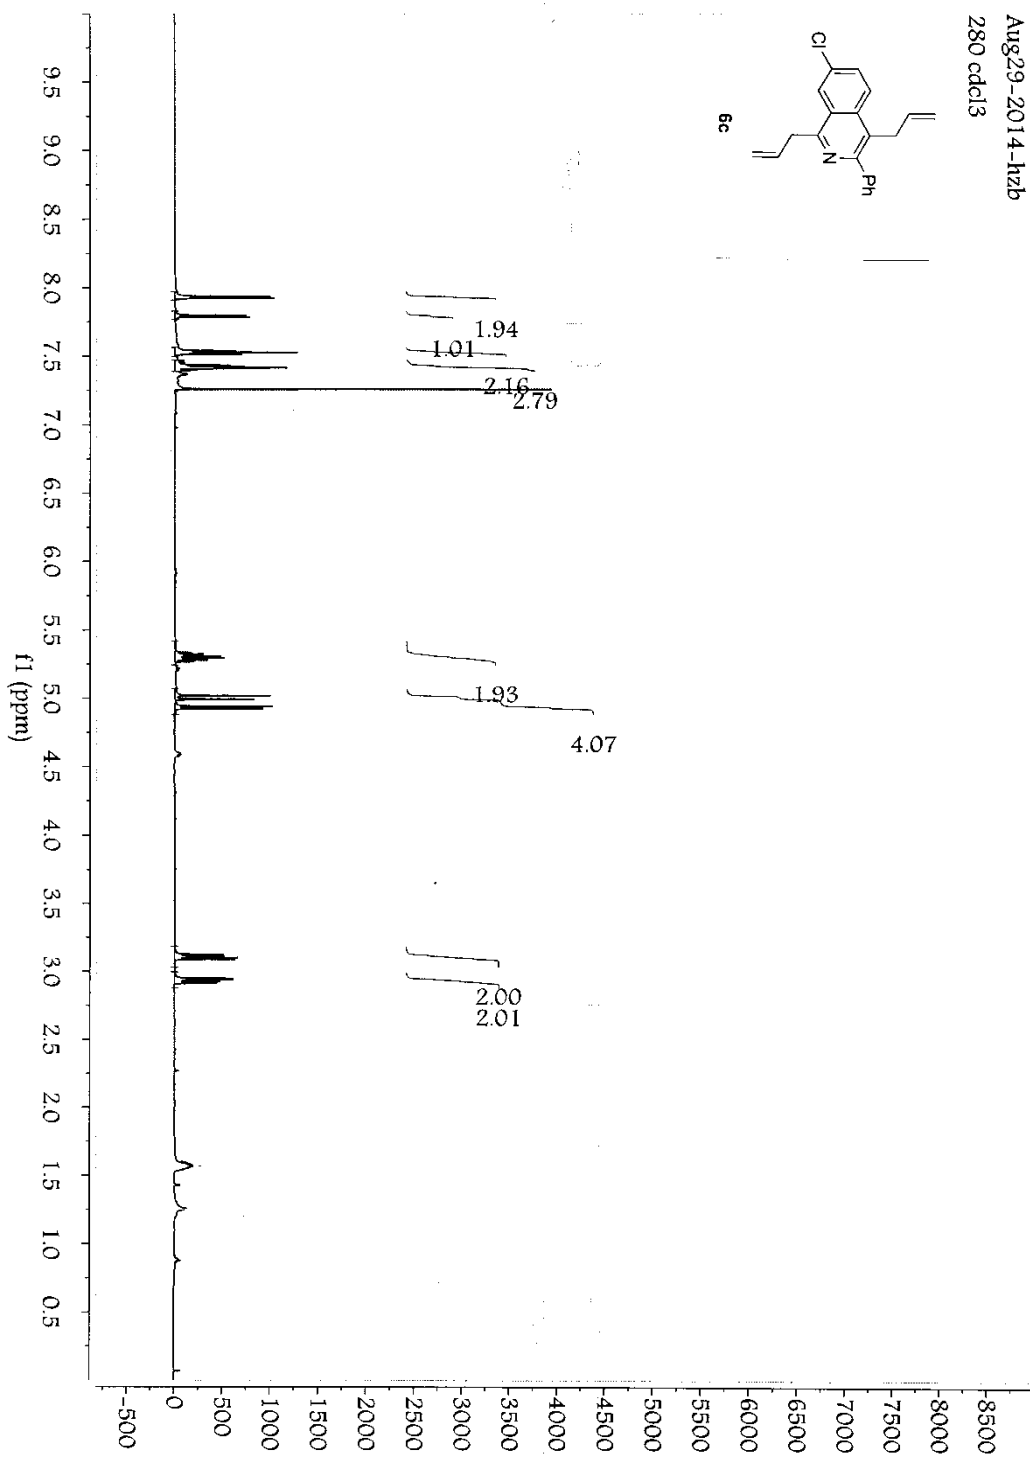

Sep17-2014-hzlb  
lav-280-c

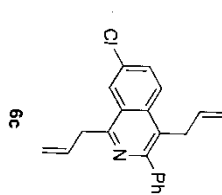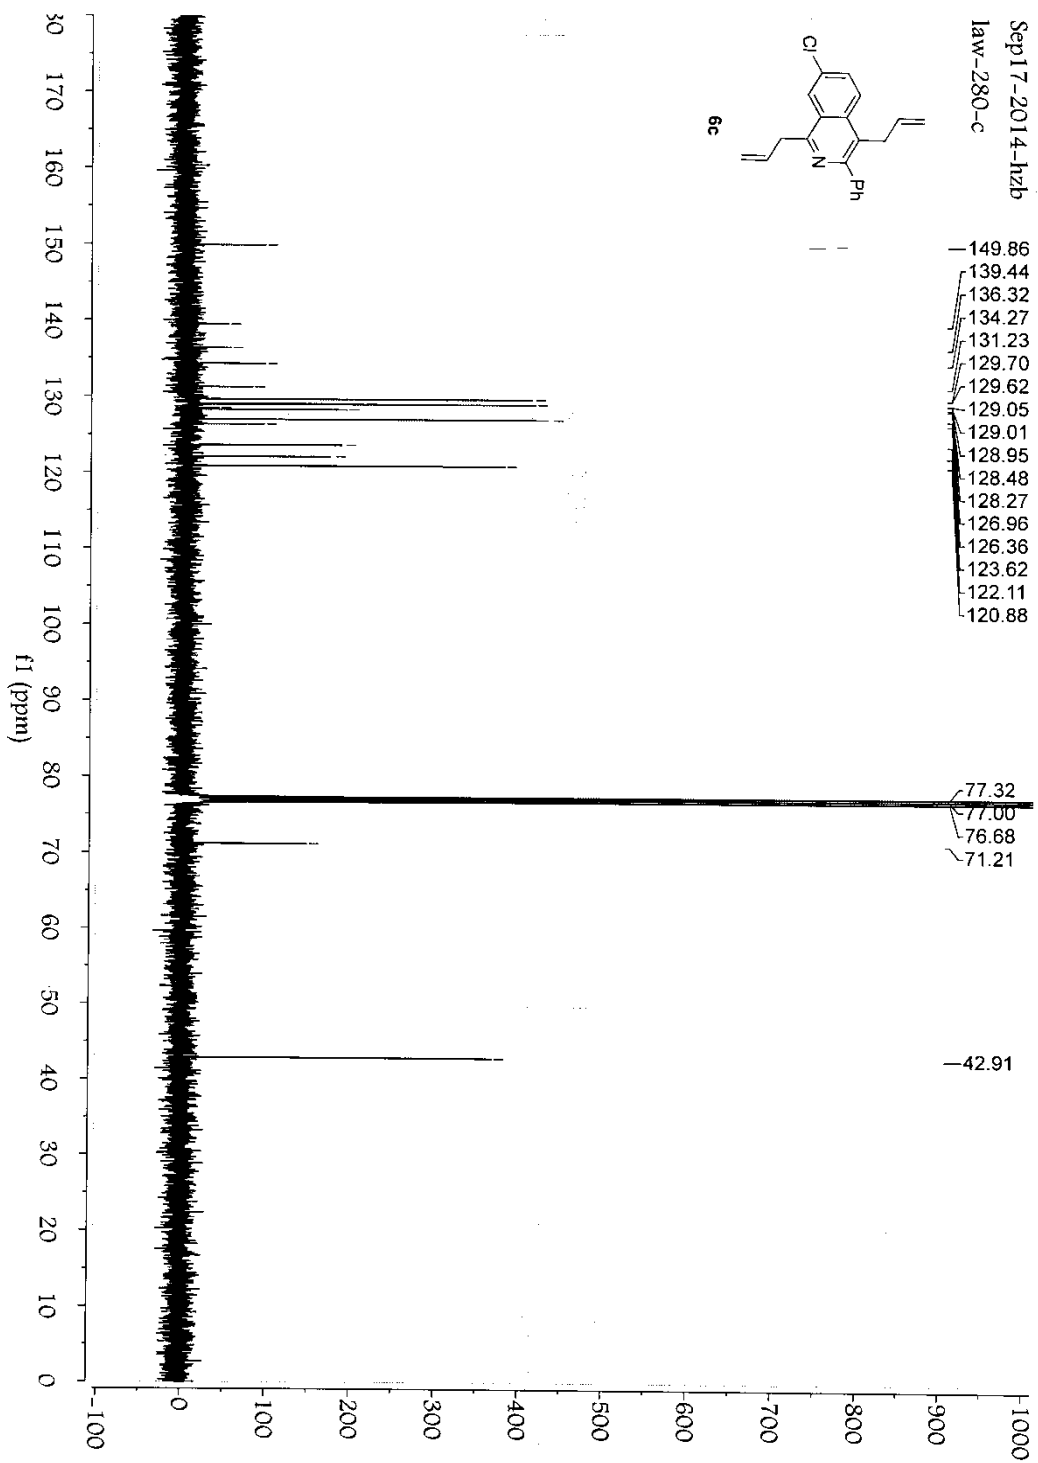

Aug15-2014-hzb  
law-261-1-p

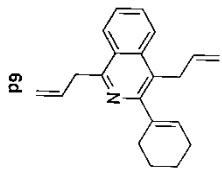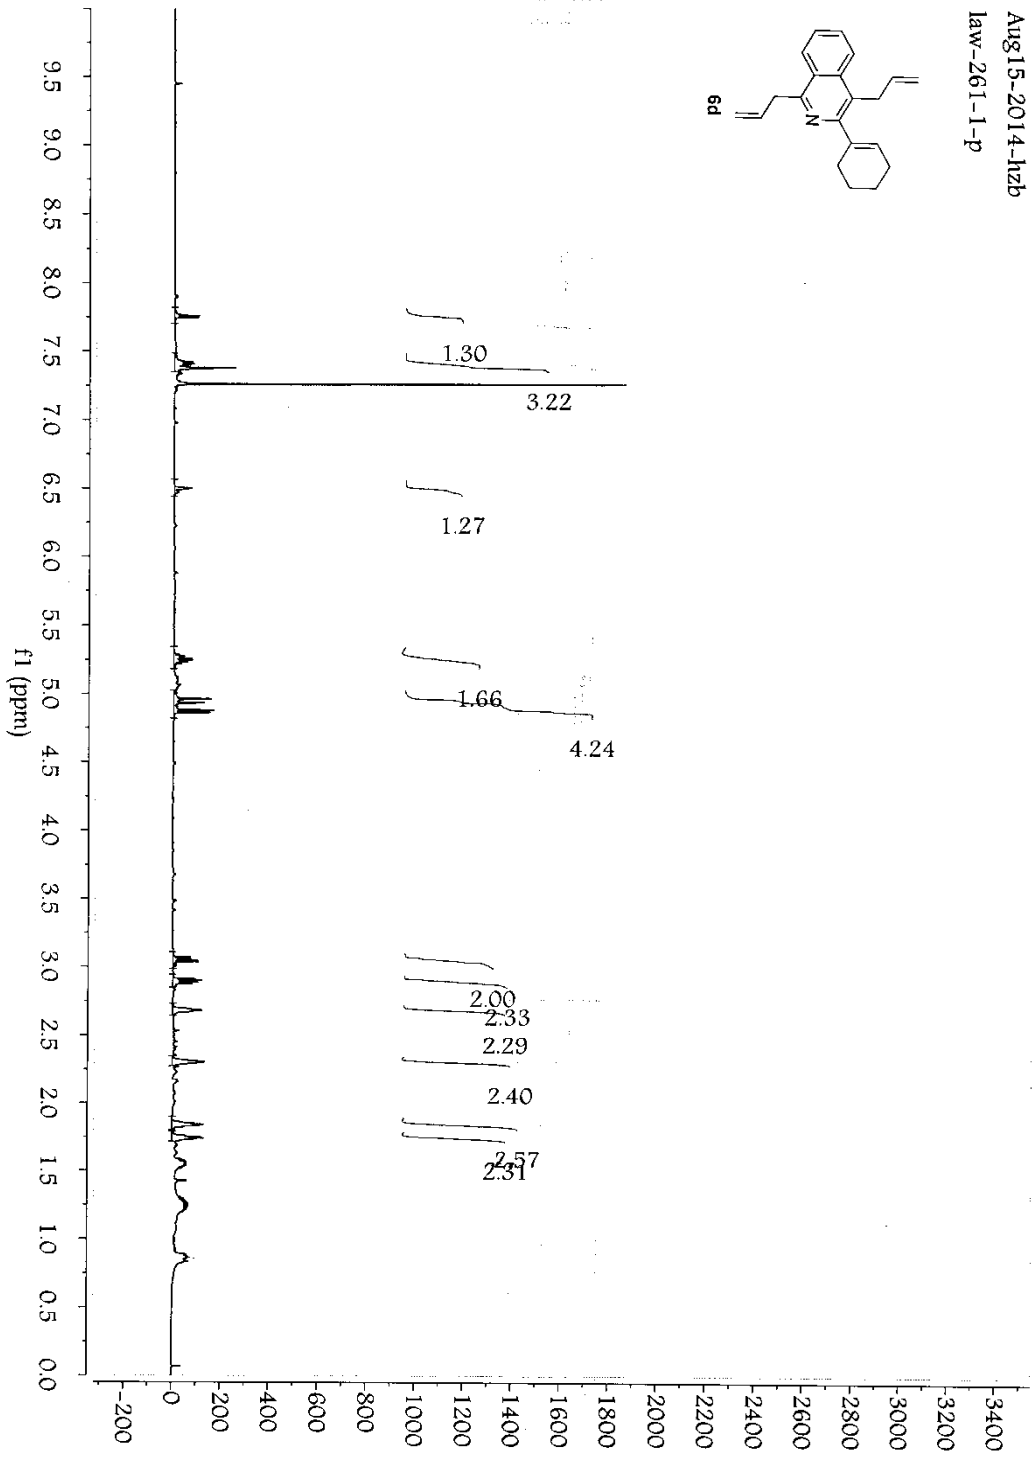

14-09-11-lj  
law-261-1-c

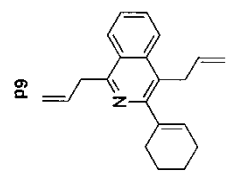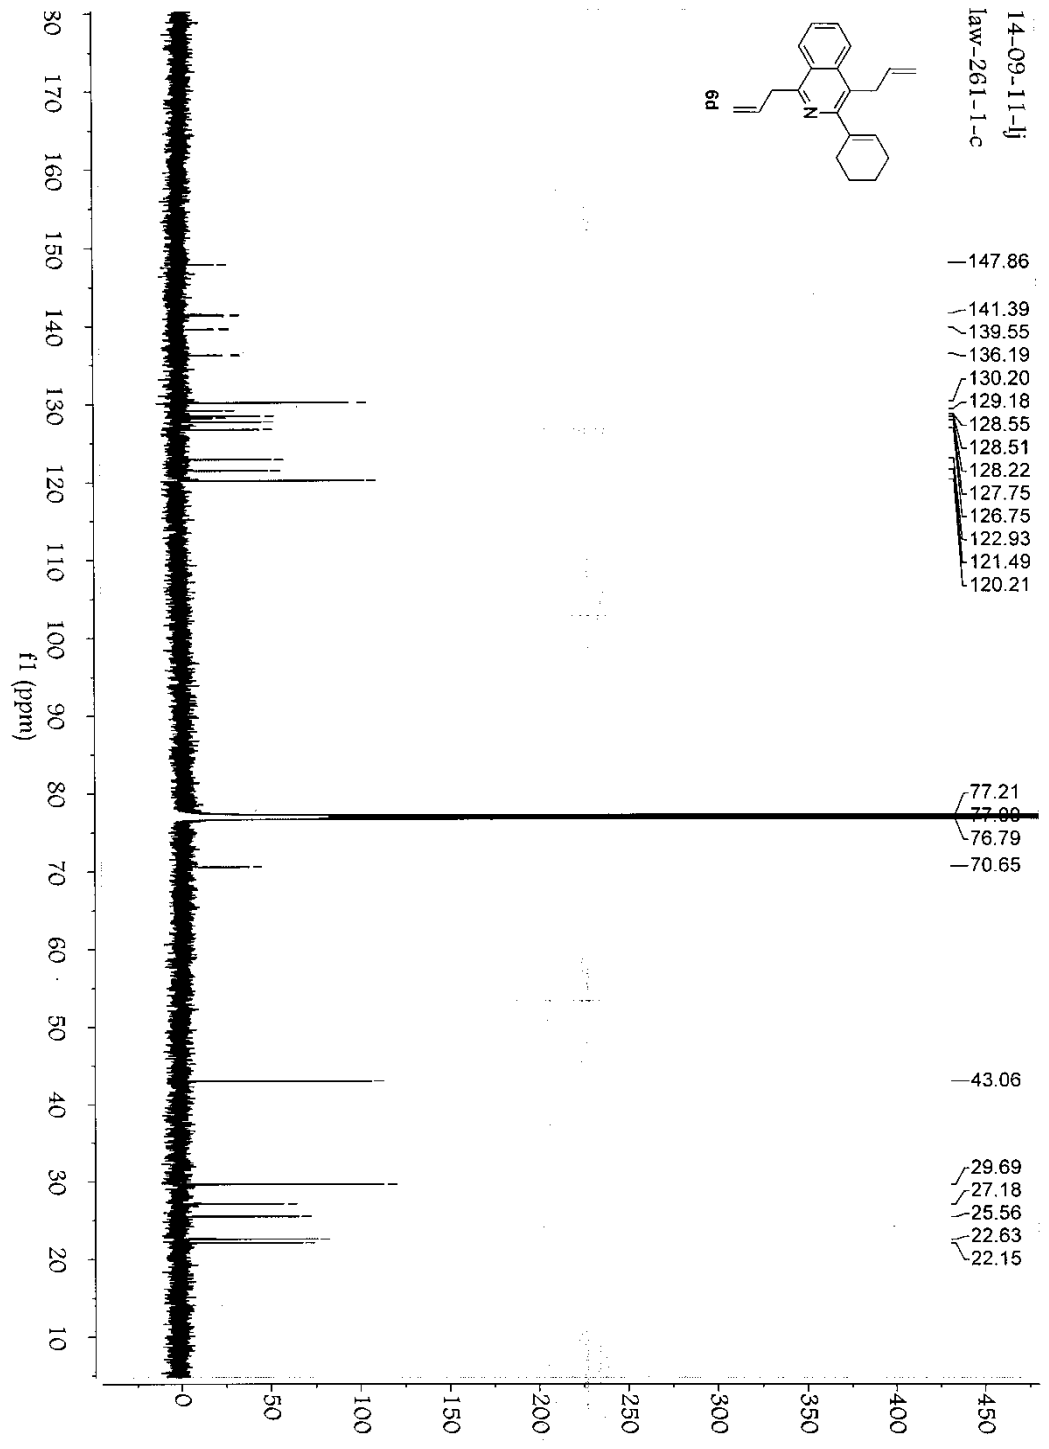



14-09-11-1j  
law-281

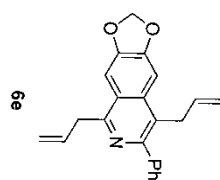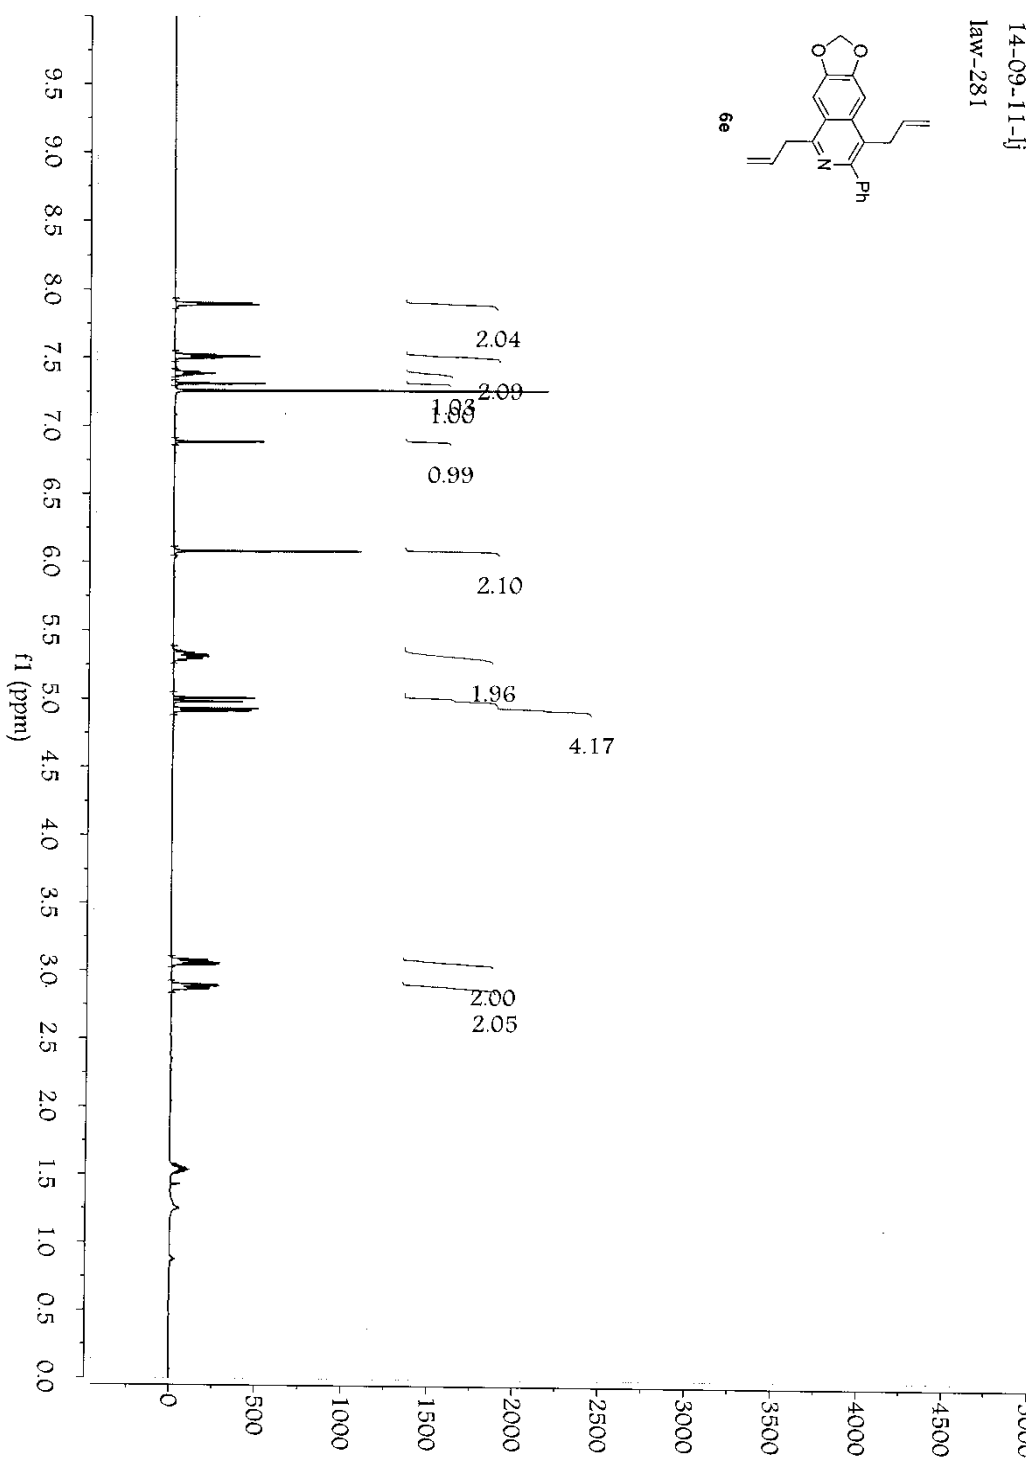

Sep12-2014  
law-281-c

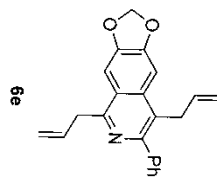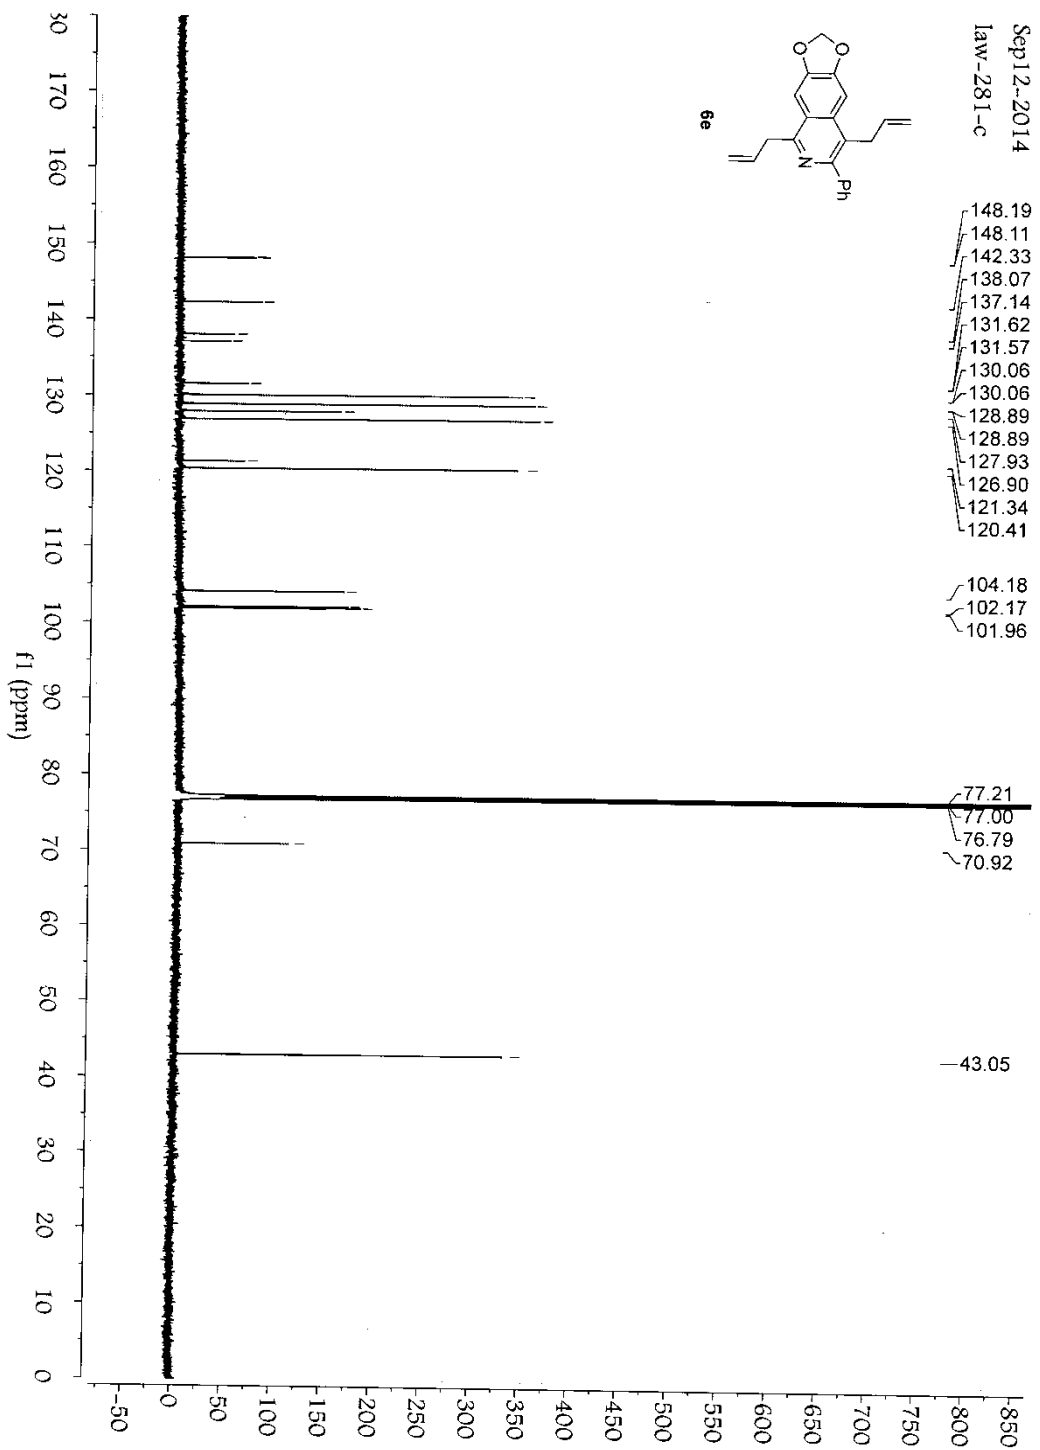

Aug29-2014-hzb  
279 cdd13

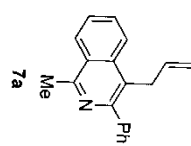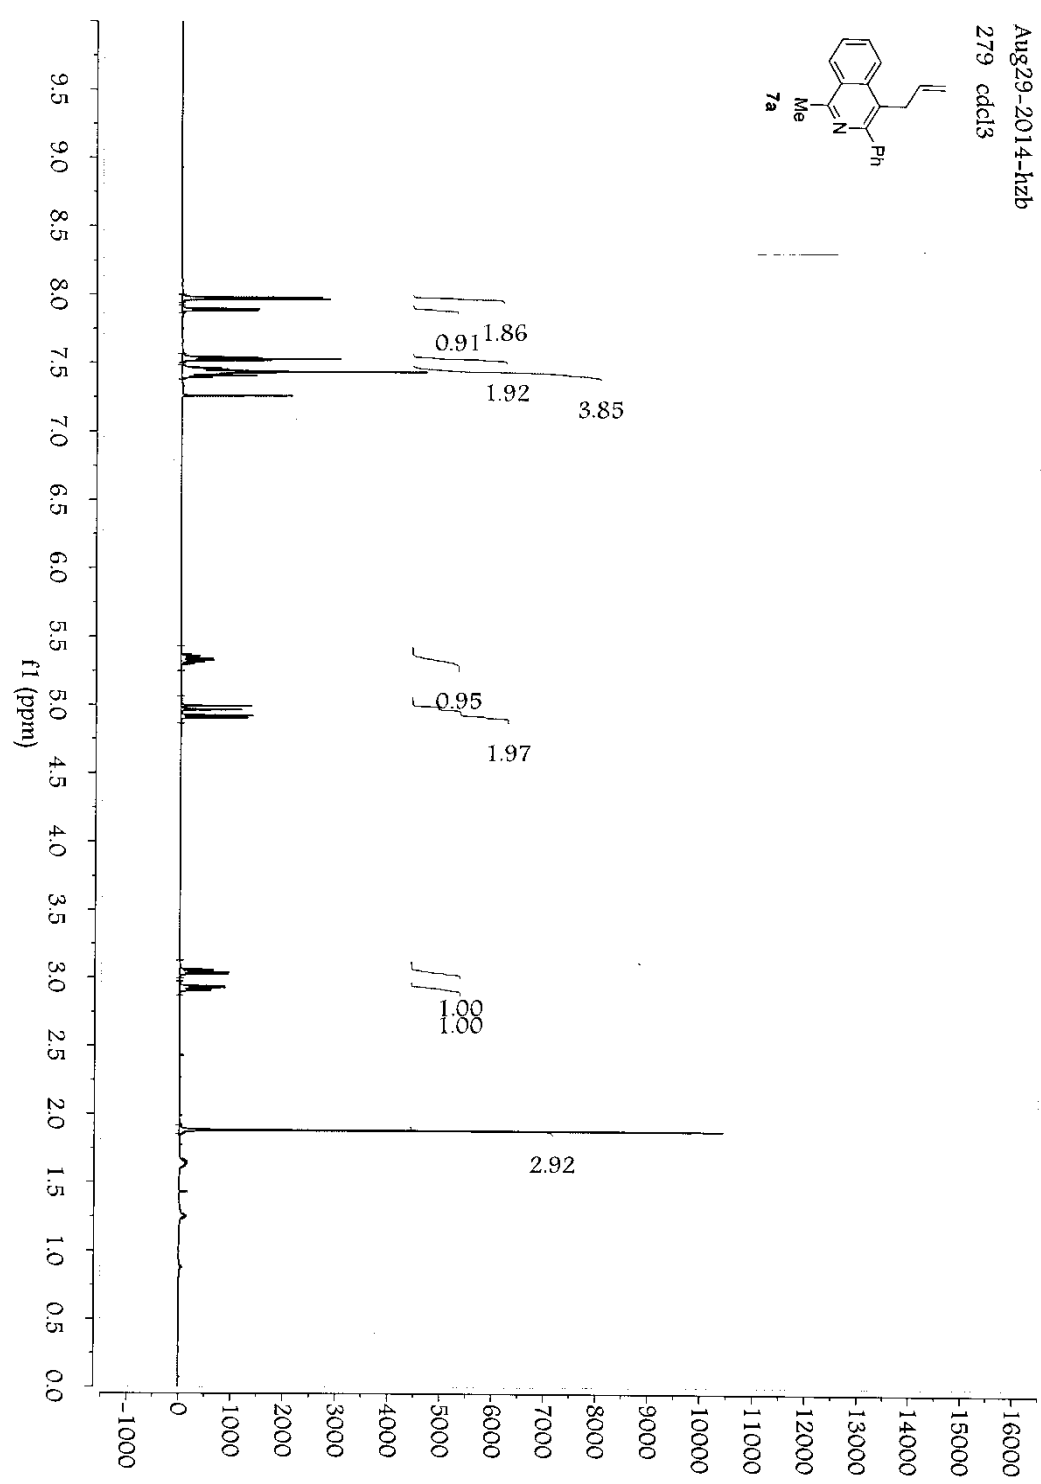

Sep 17-2014-hzb  
law-279-c

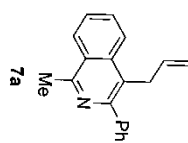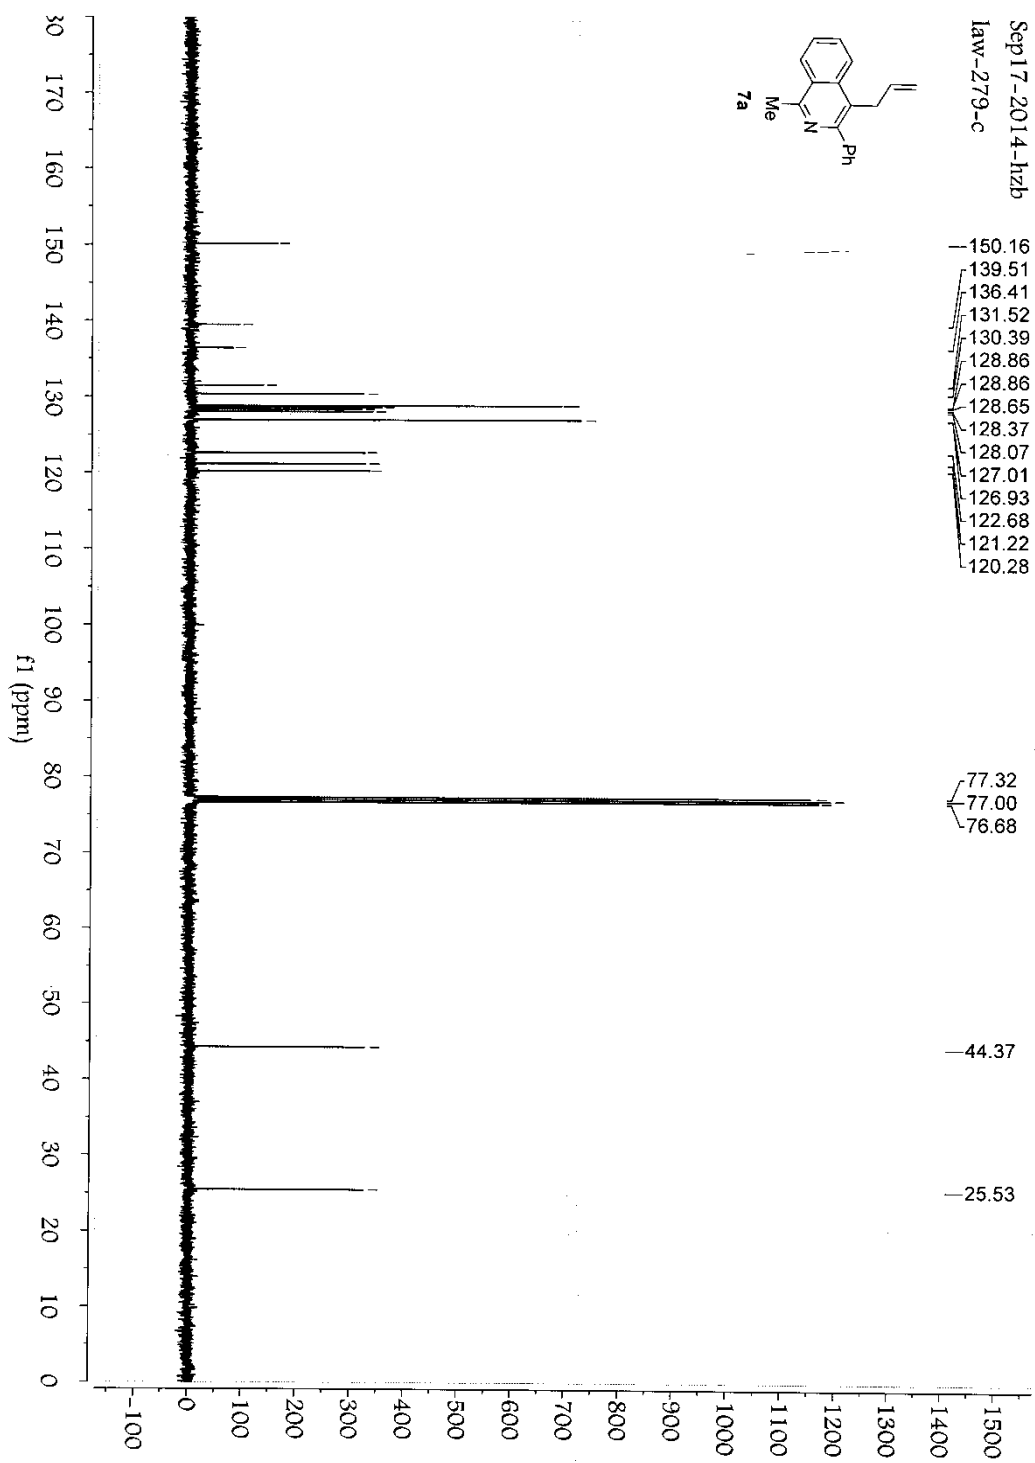

14-09-11-1j  
law-284

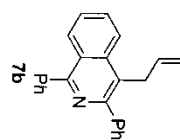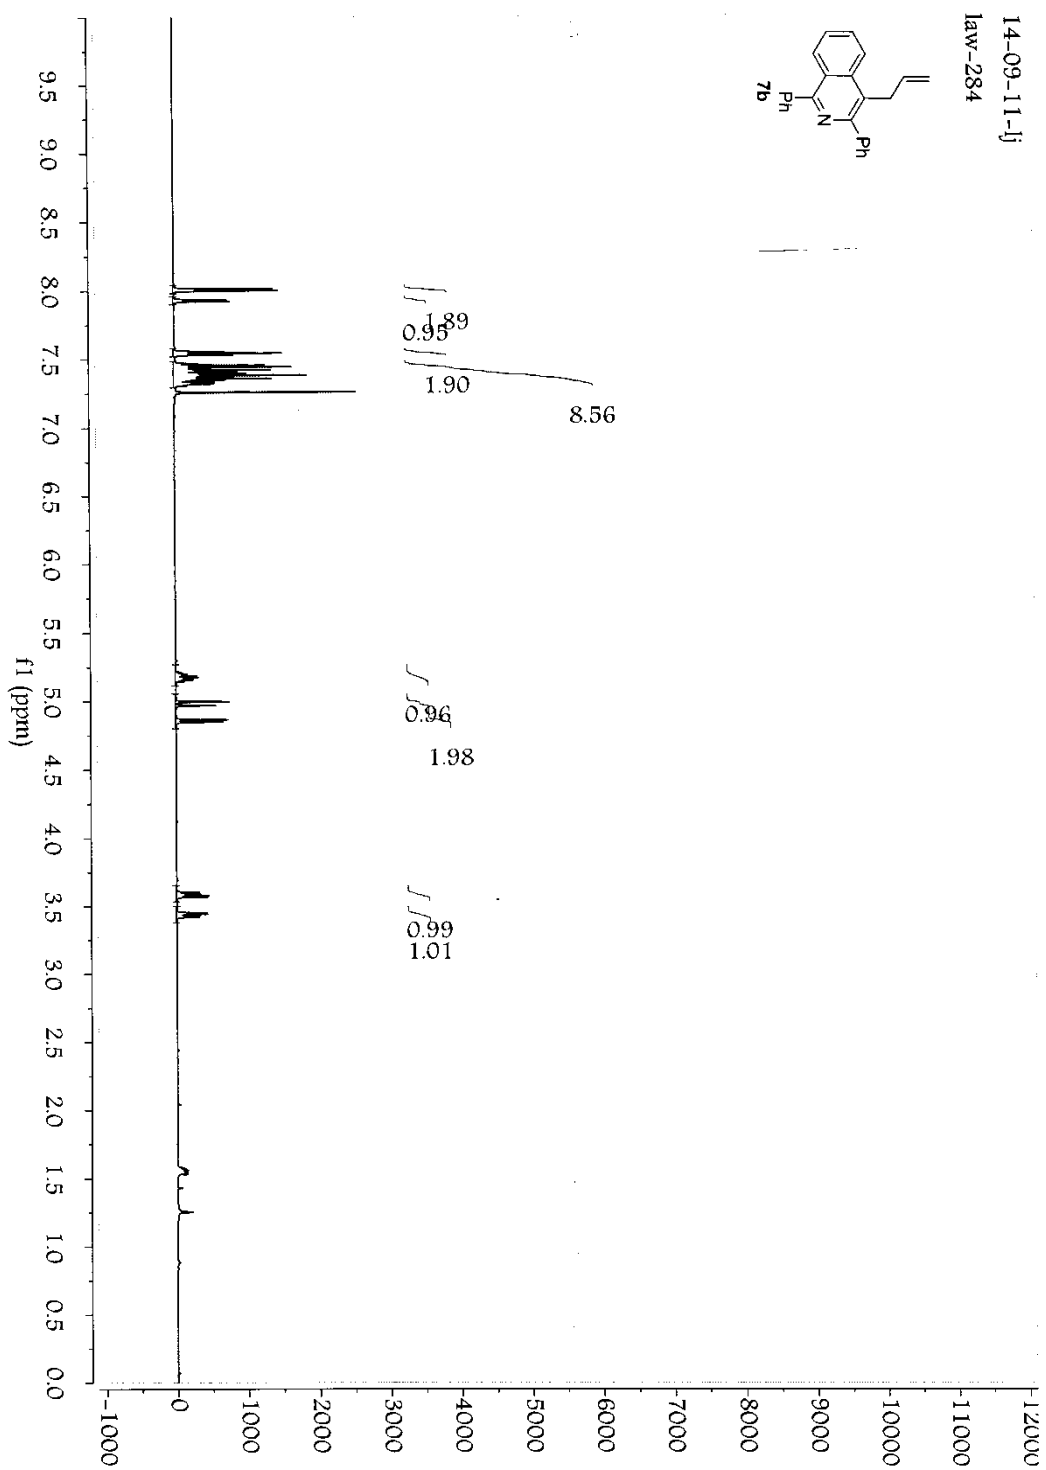

Sep28-2014-hzlb  
1aw-284-1-c

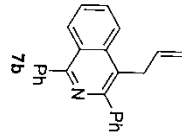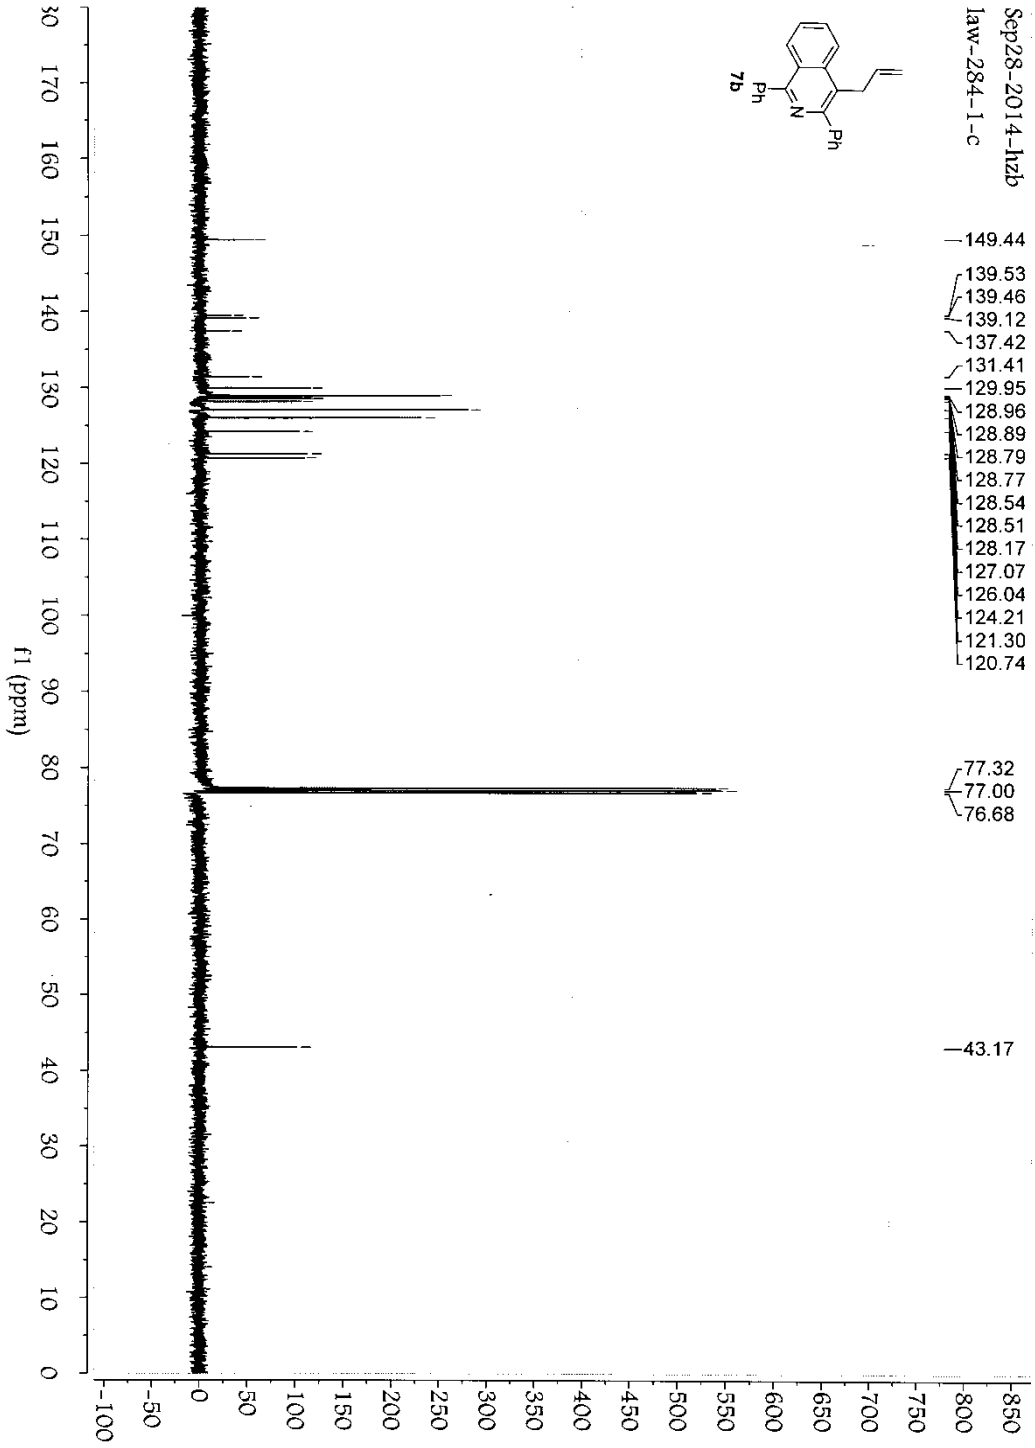

14-09-11-1j  
law-282

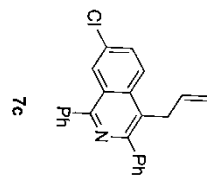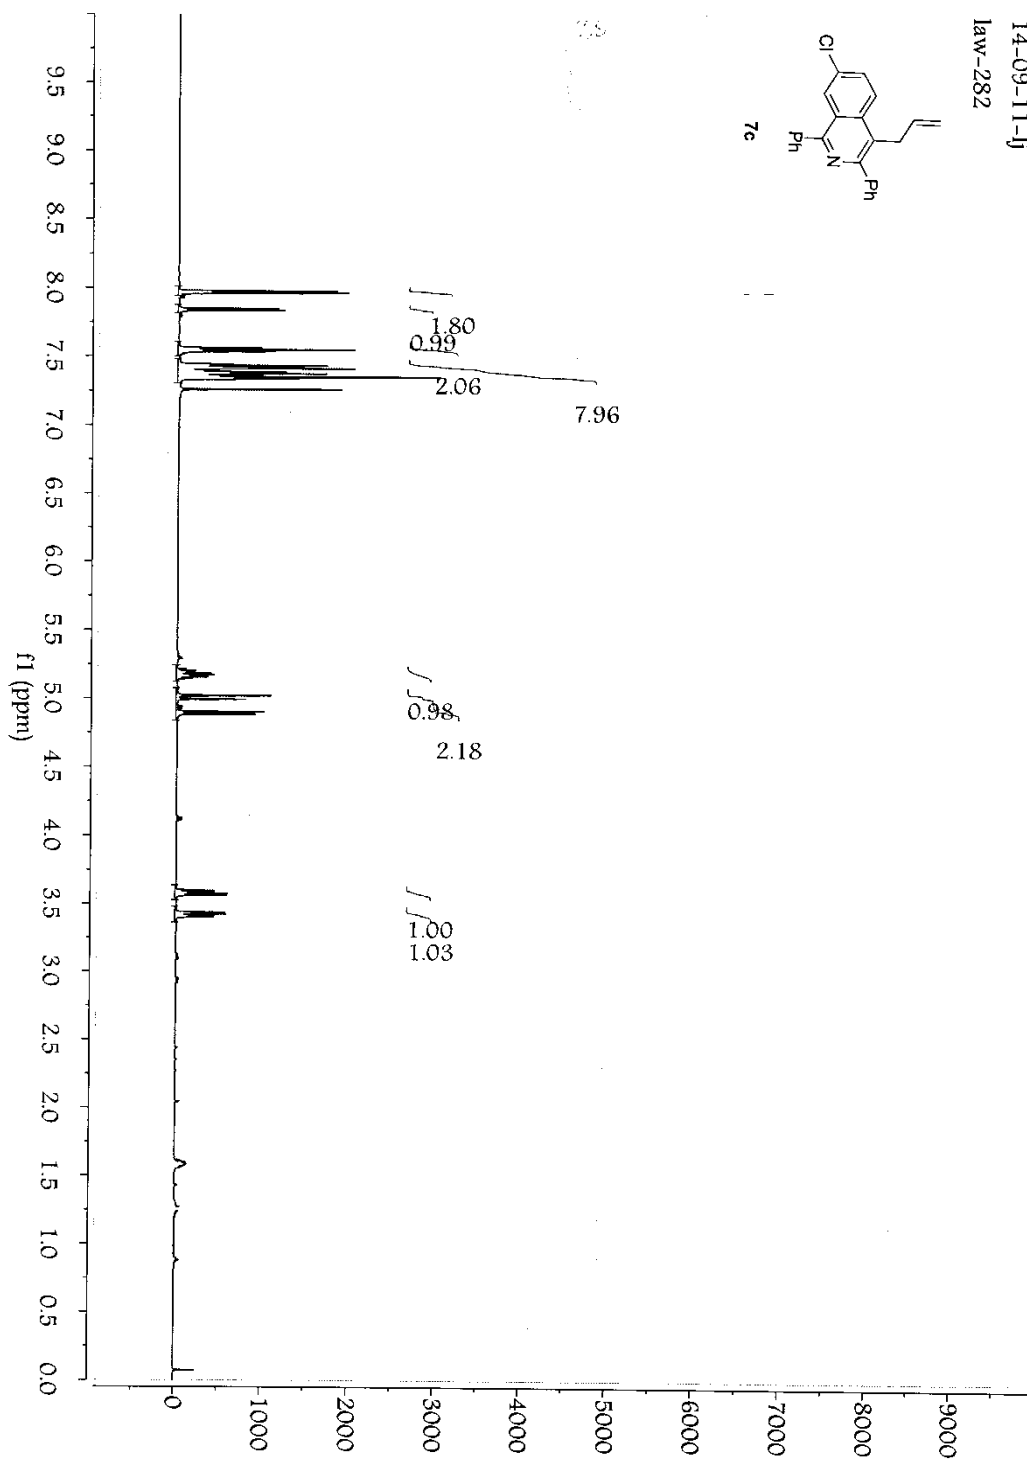

Sep28-2014-hzlb  
1aw-282-c

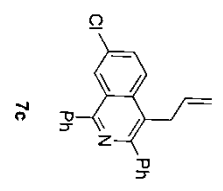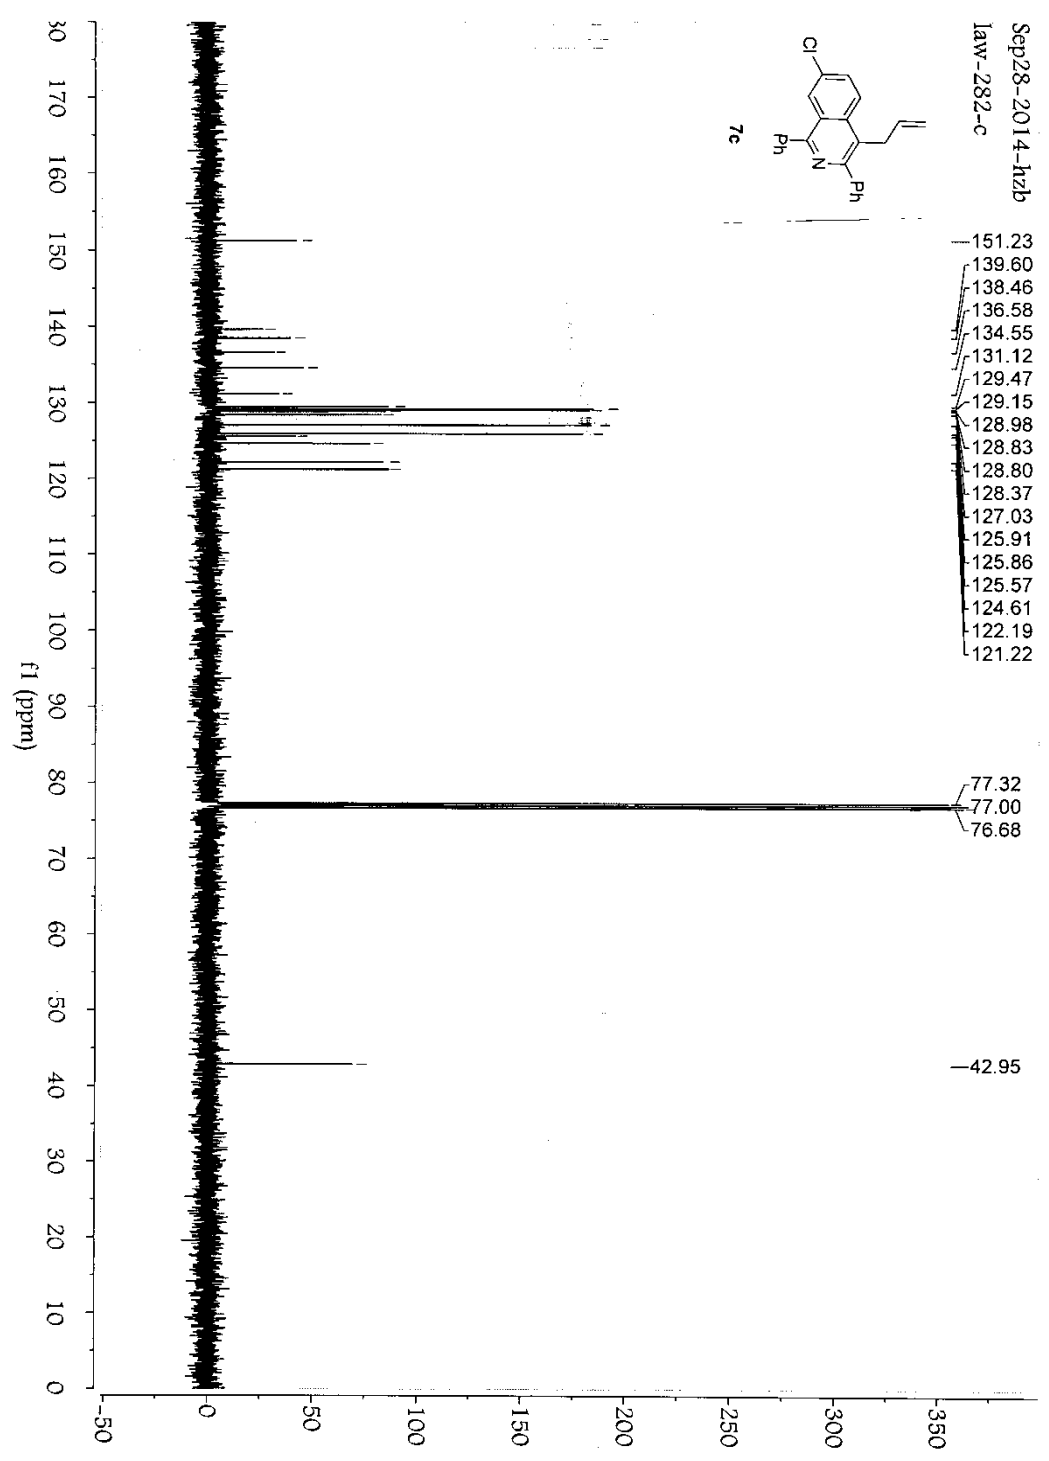



14-09-11-fj  
law-2855

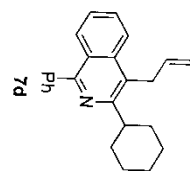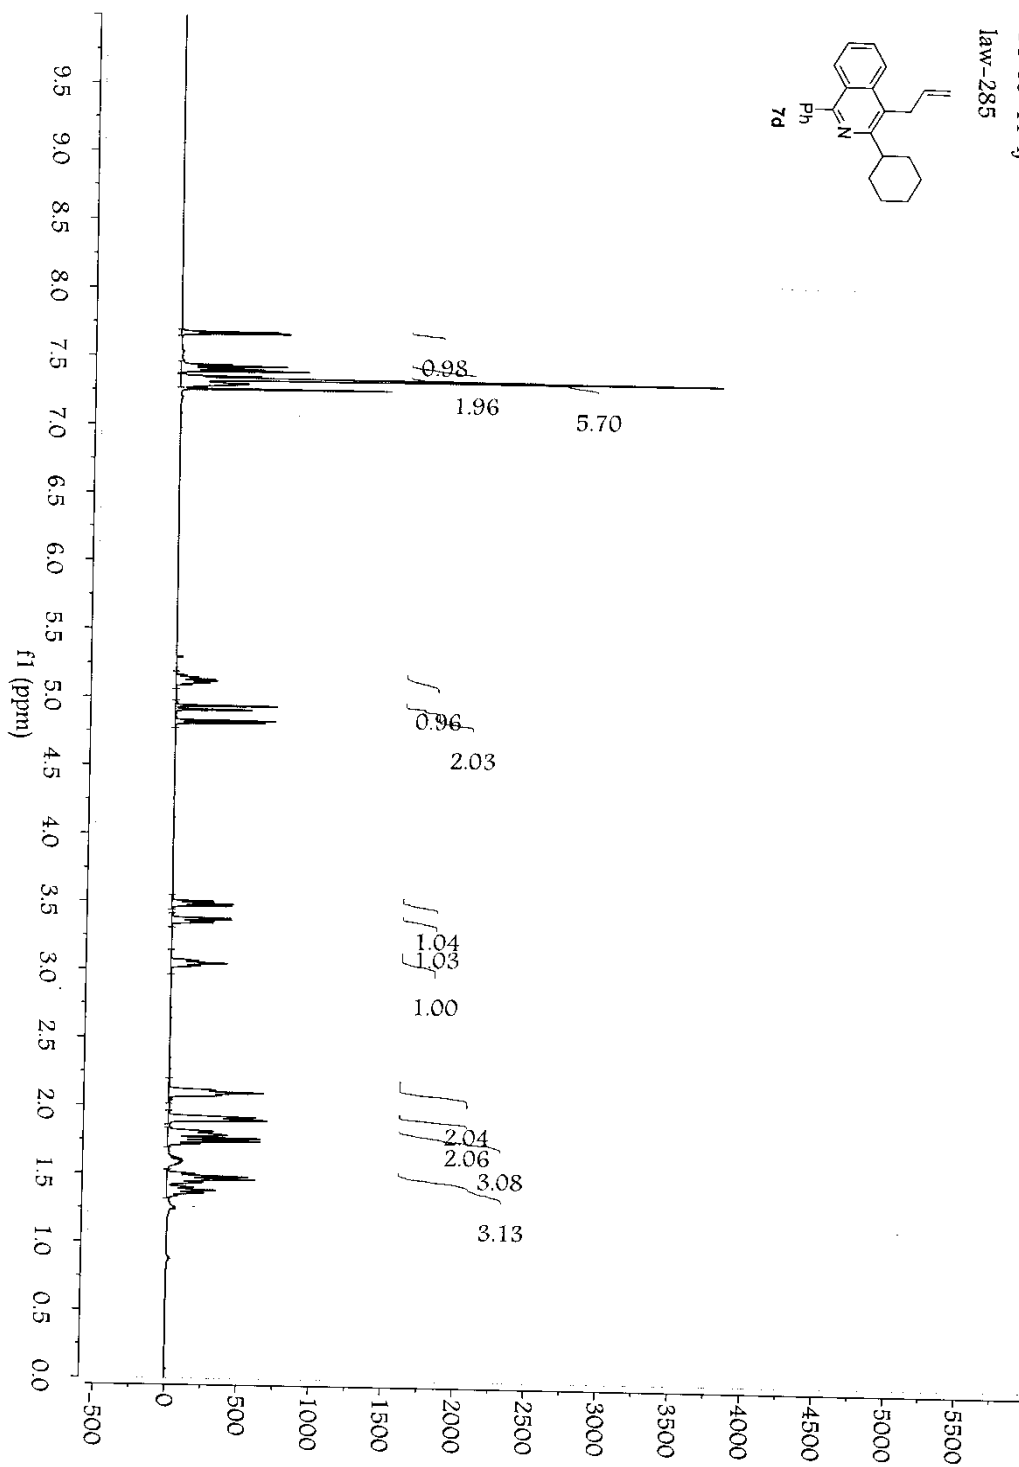

Sep12-2014  
1aw-285-c

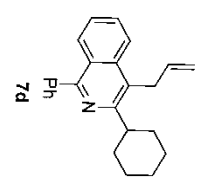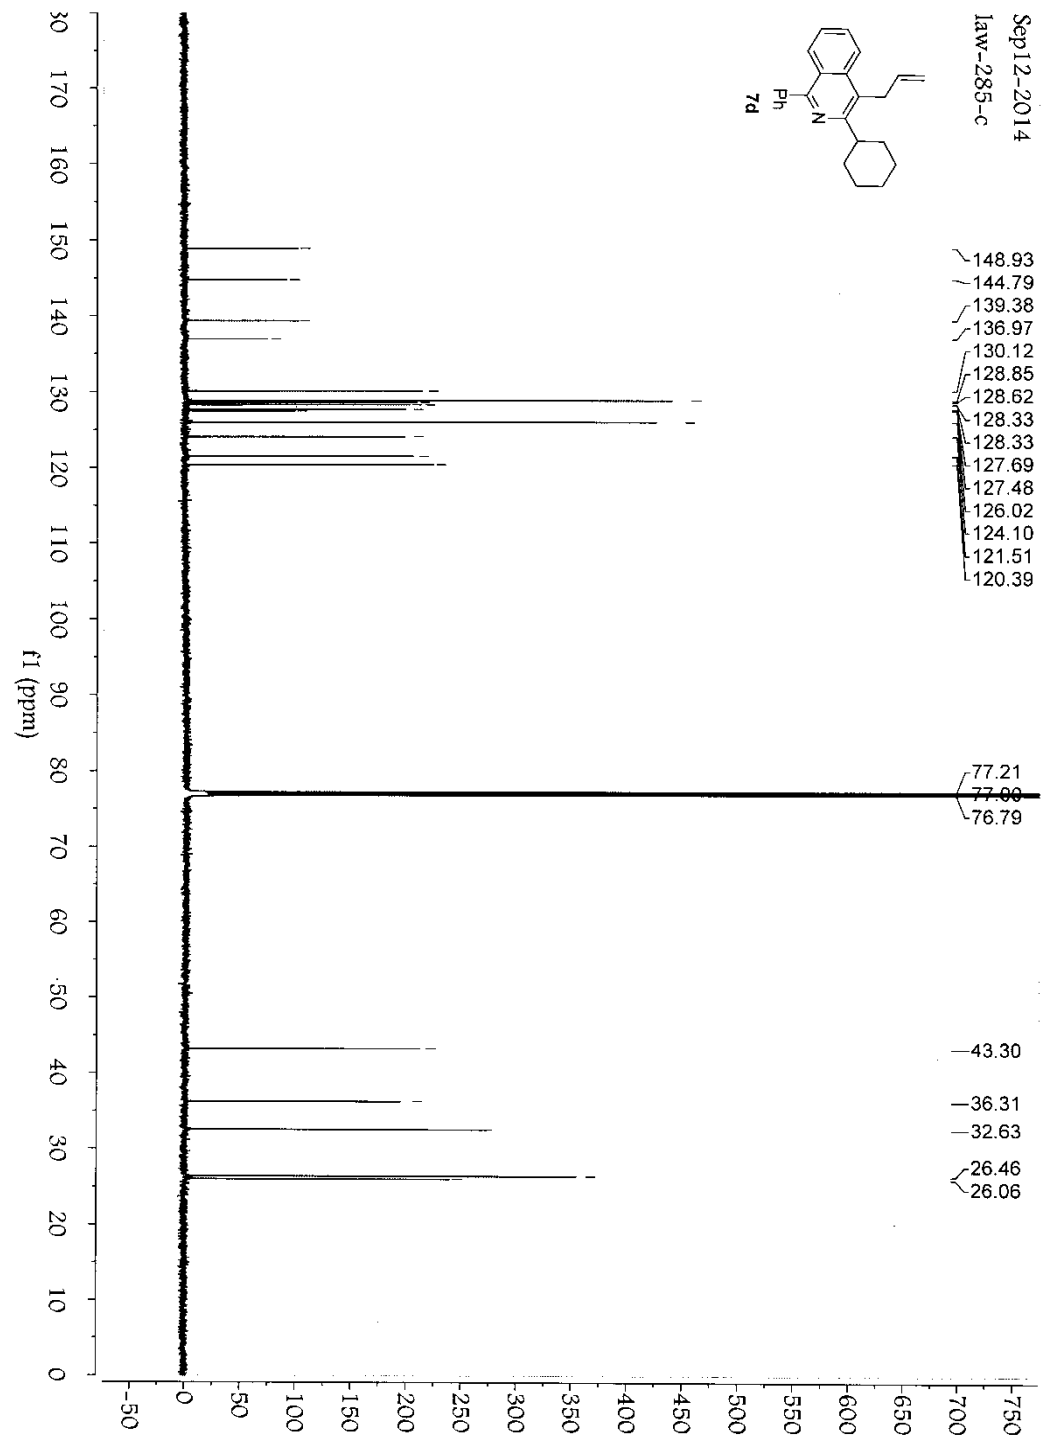

Sep25-2014-hzb  
LAW-252

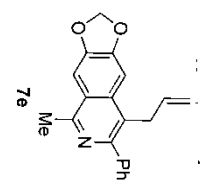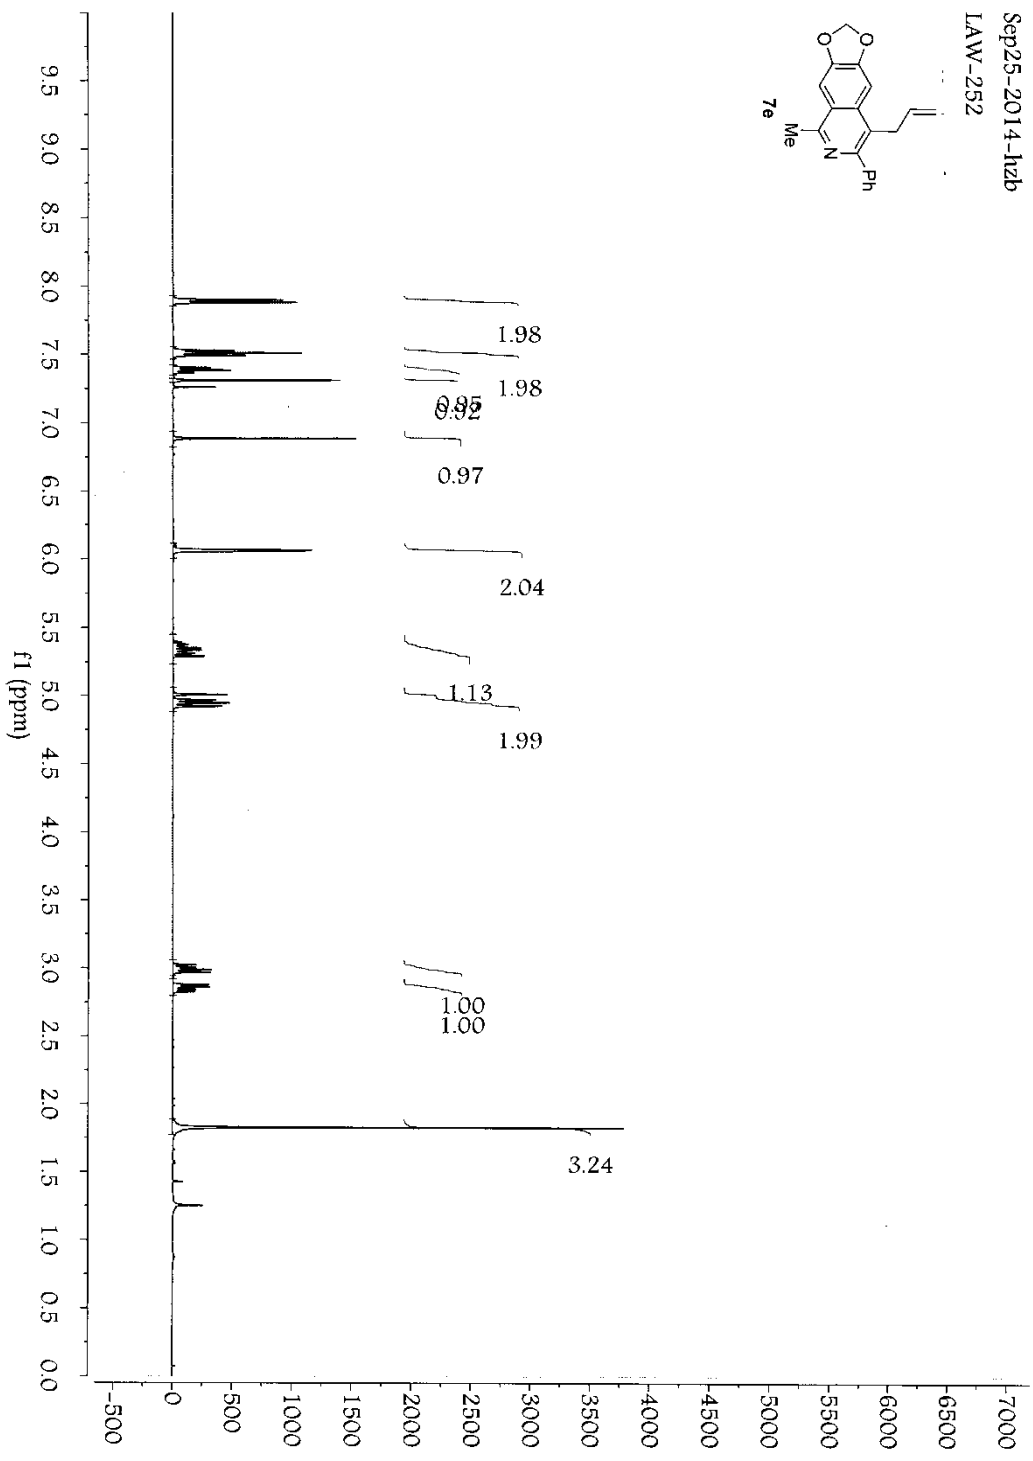

Sep25-2014-hzlb  
LAW-252-C

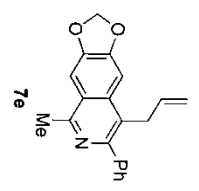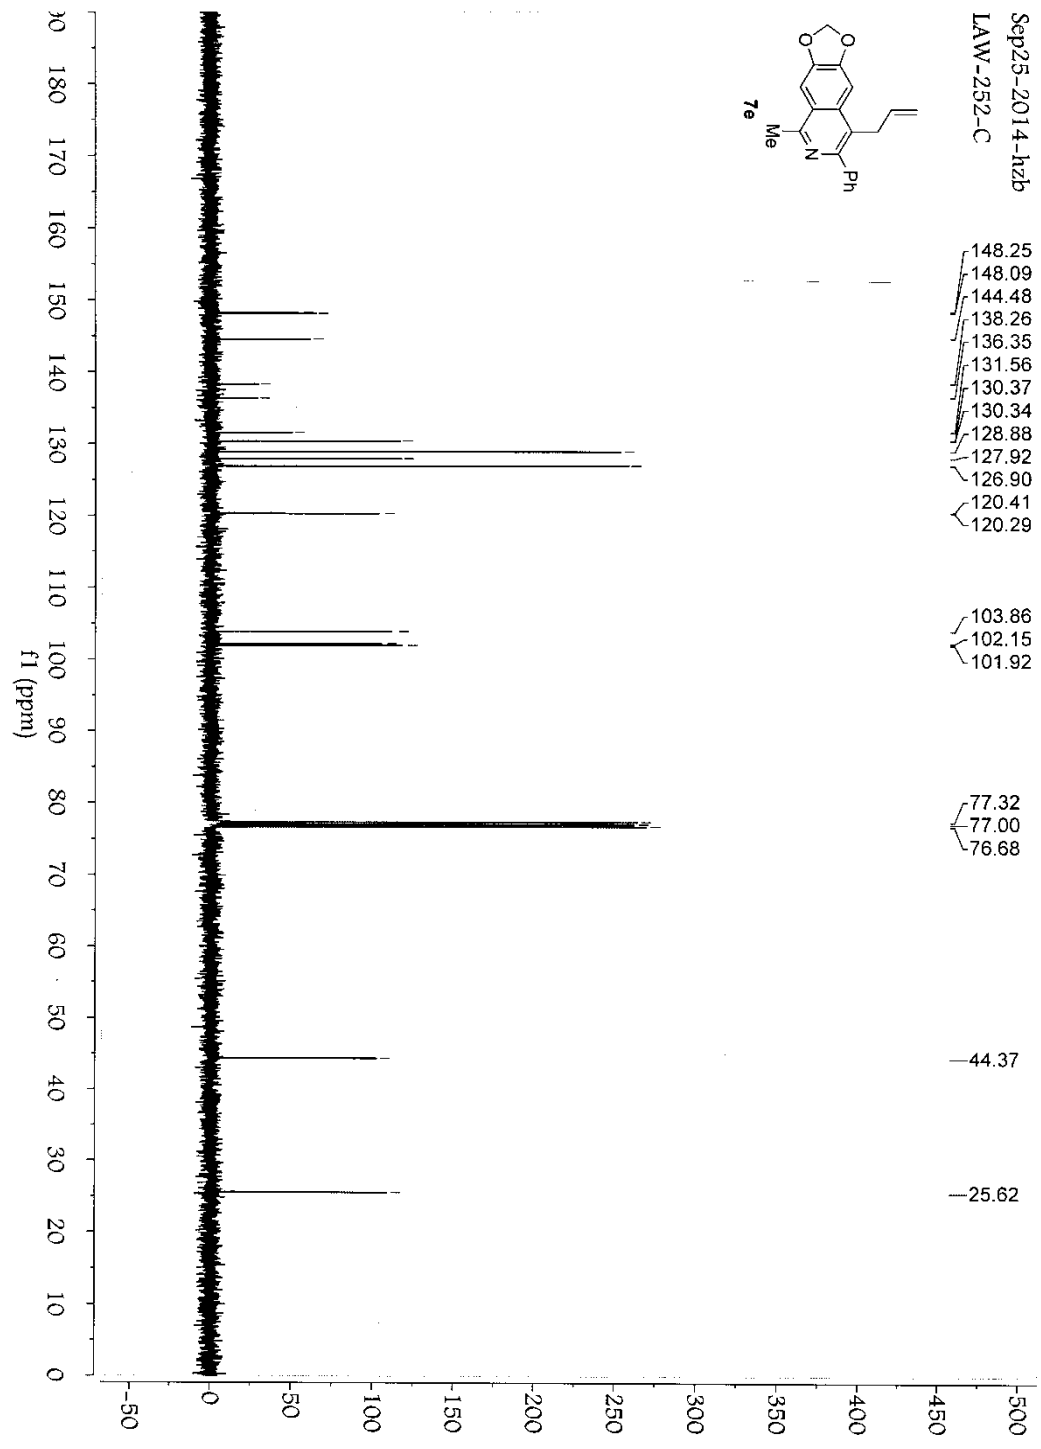

Aug12-2014-hzb  
262

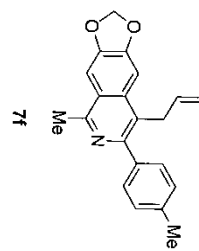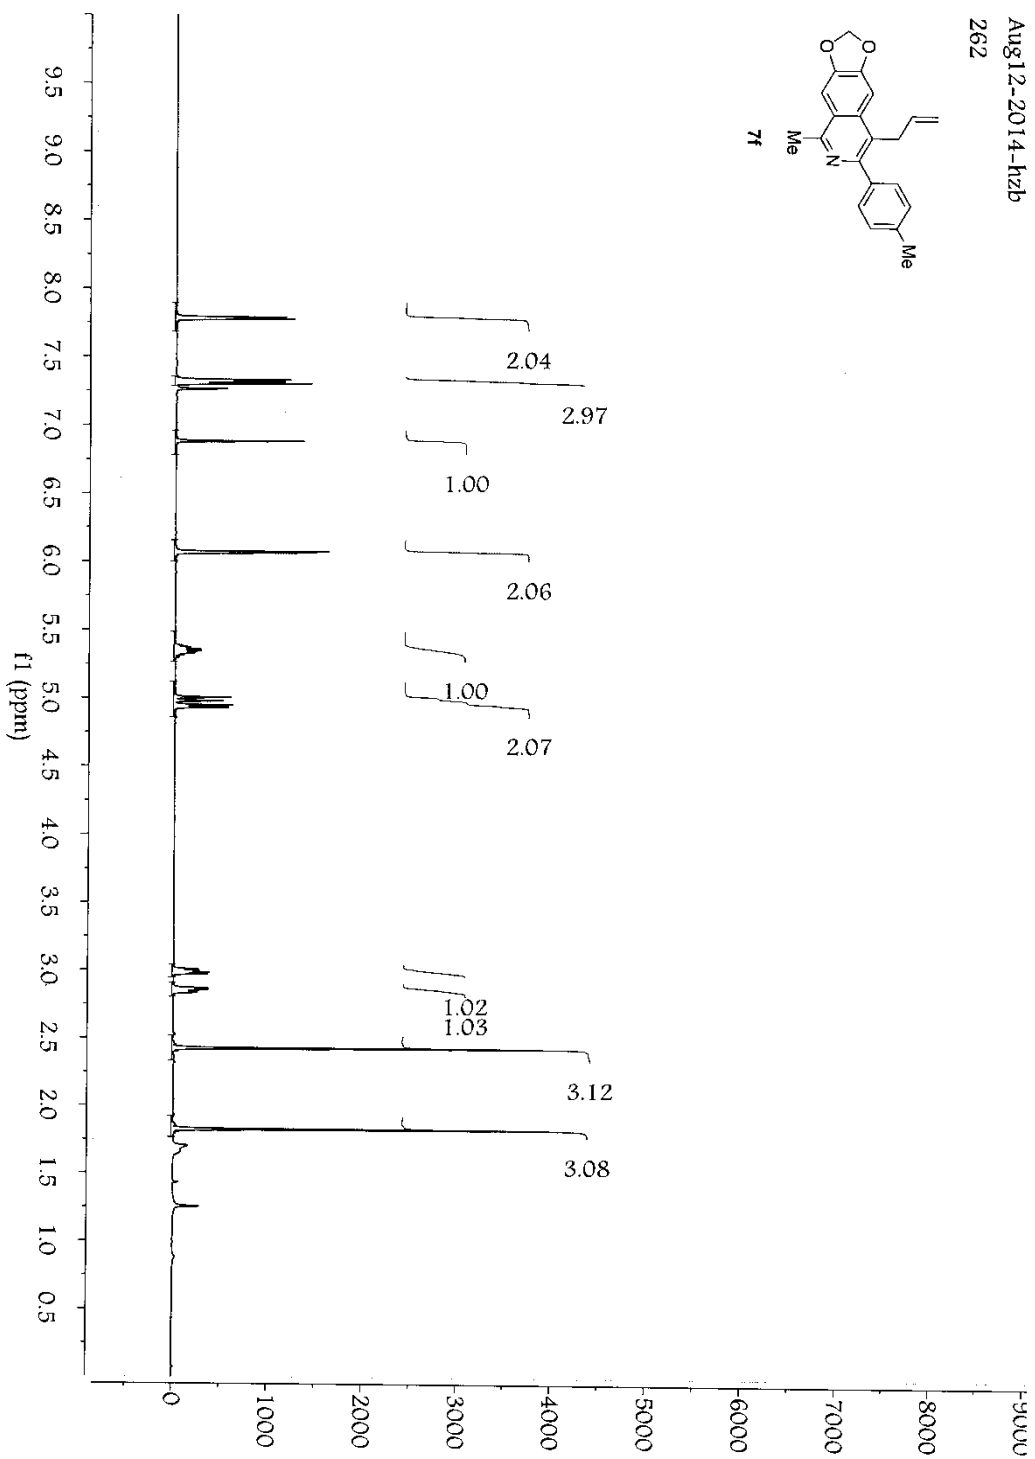

Sep25-2014-hzb  
LAW-262-C

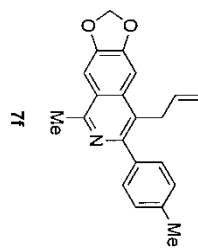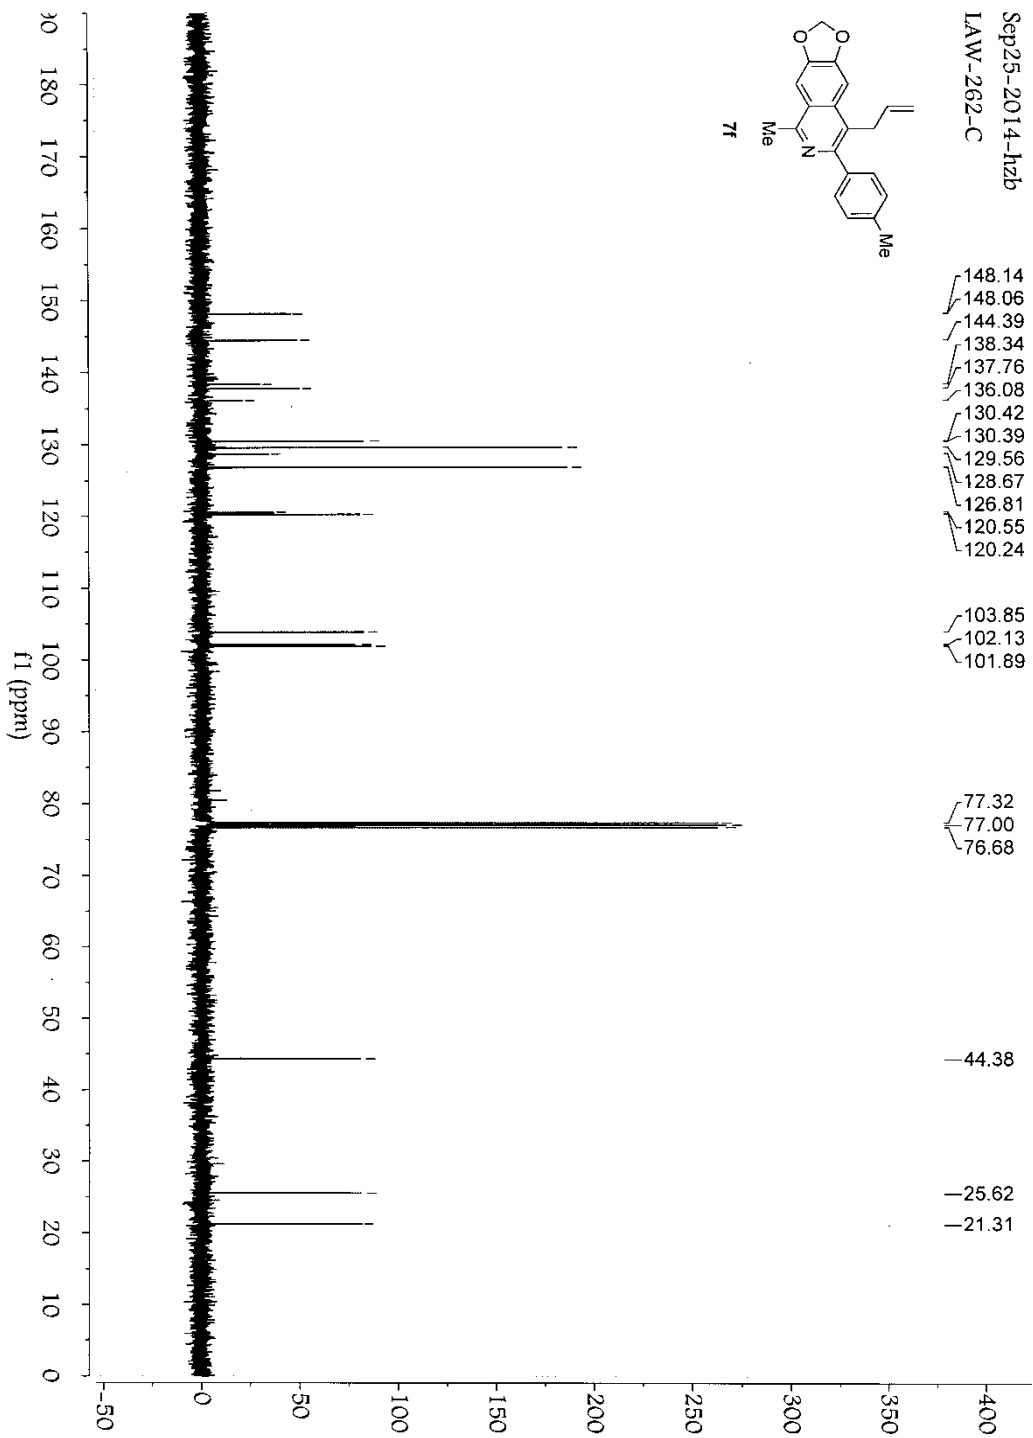

Jan15-2015-hzb  
2103

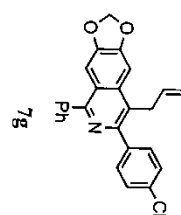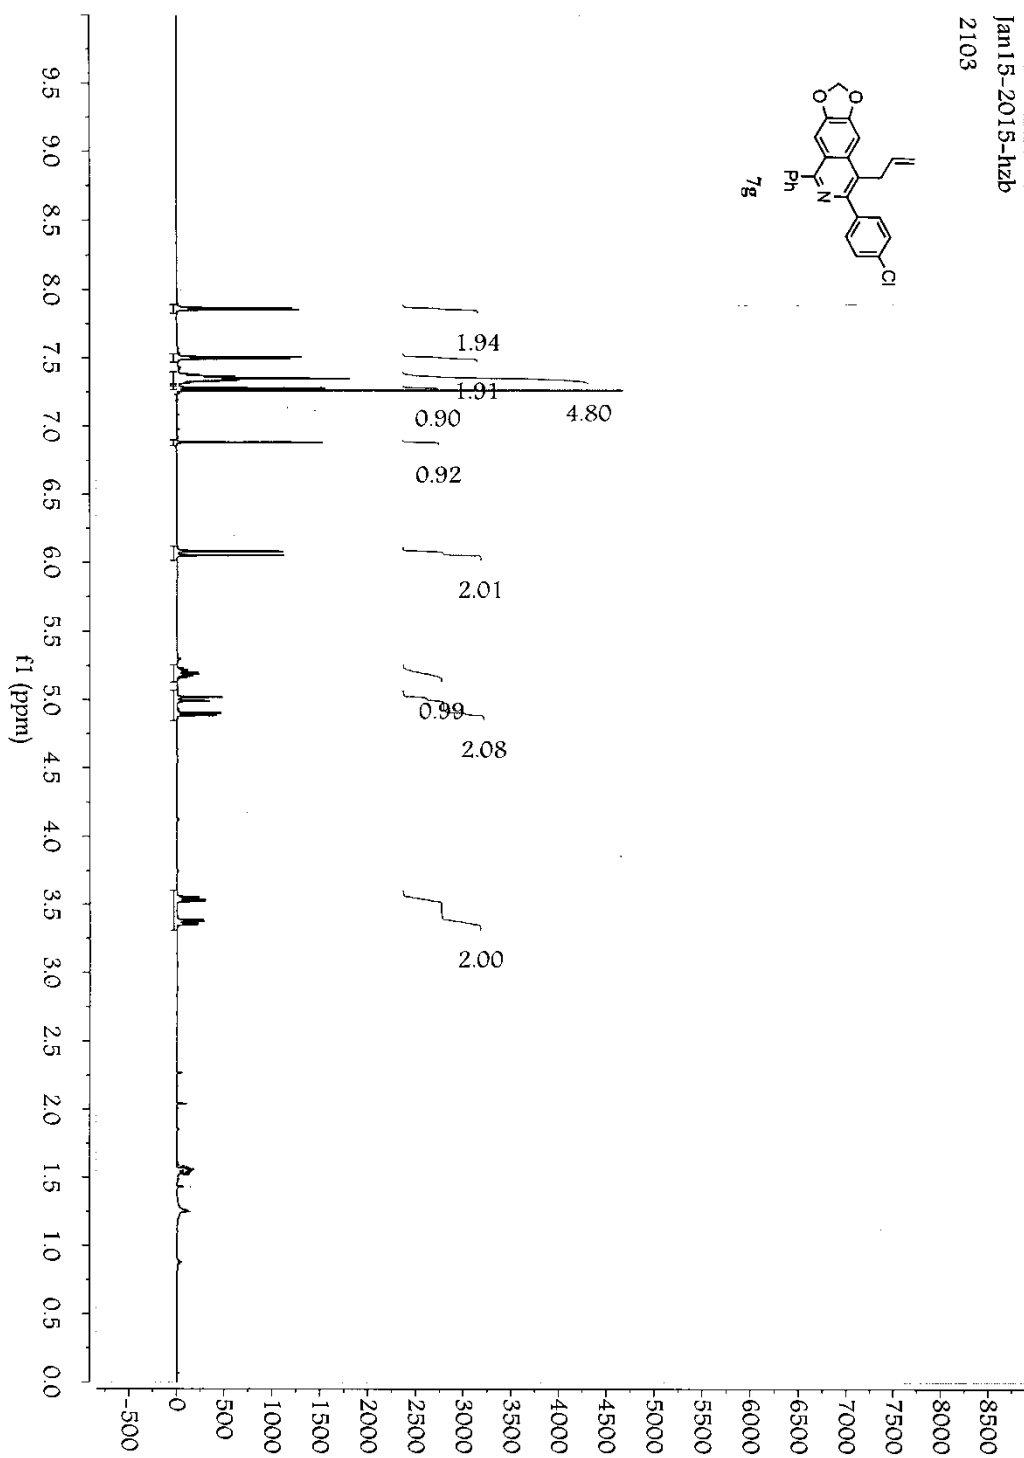

Jan15-2015-hzb  
2103

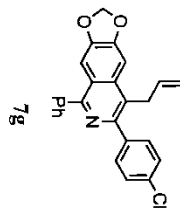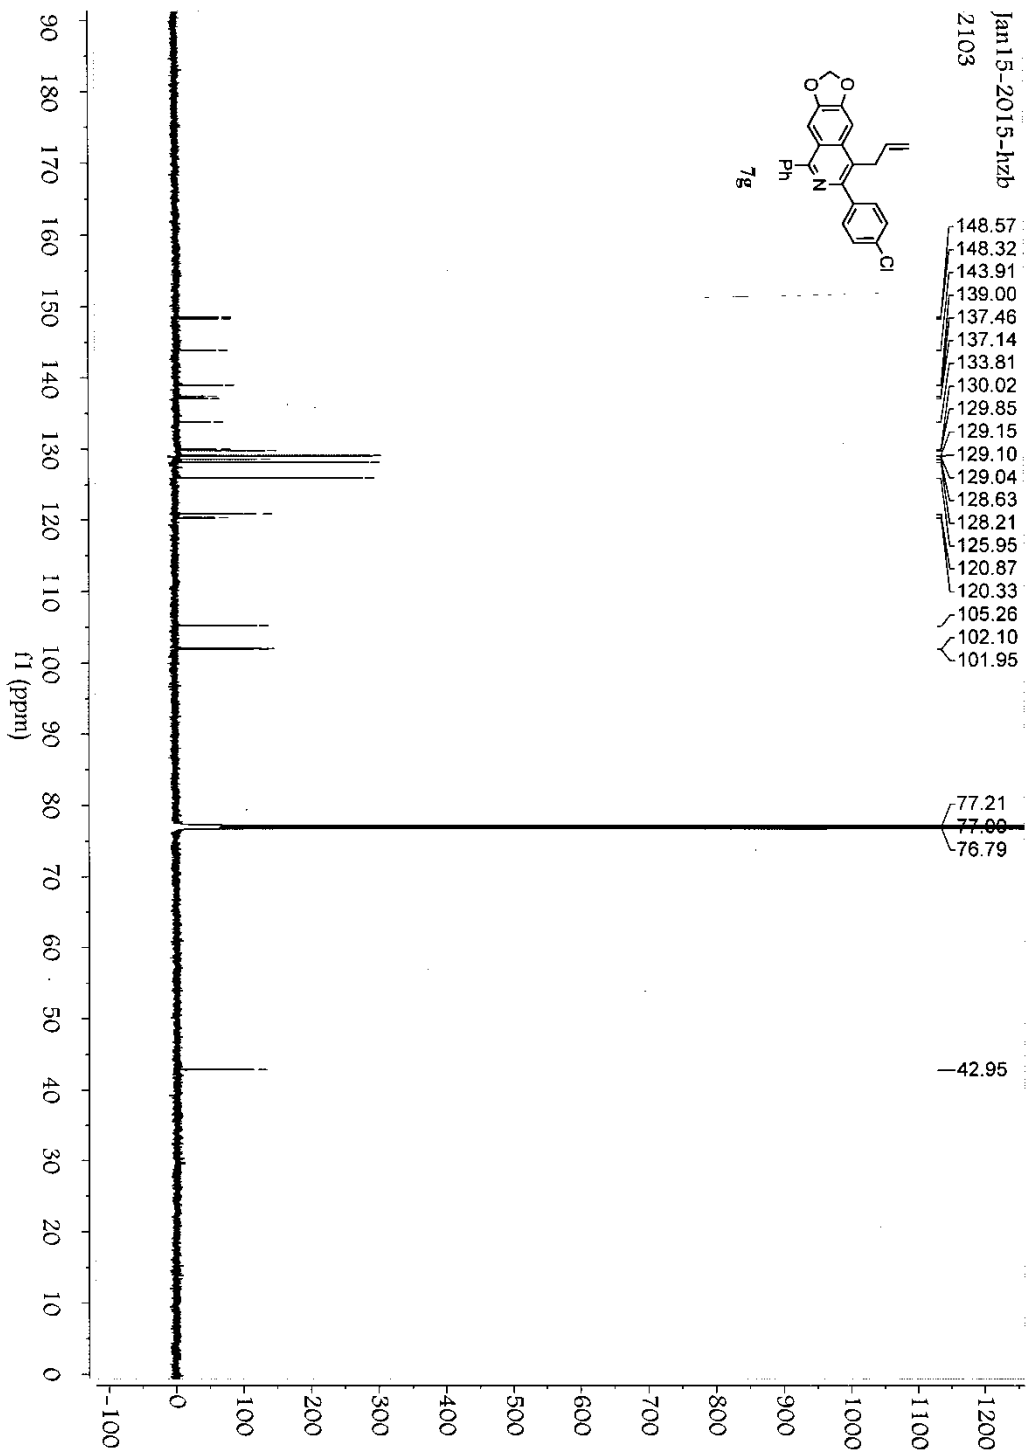



Jan15-2015-hzb  
296

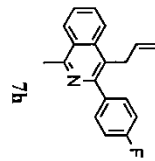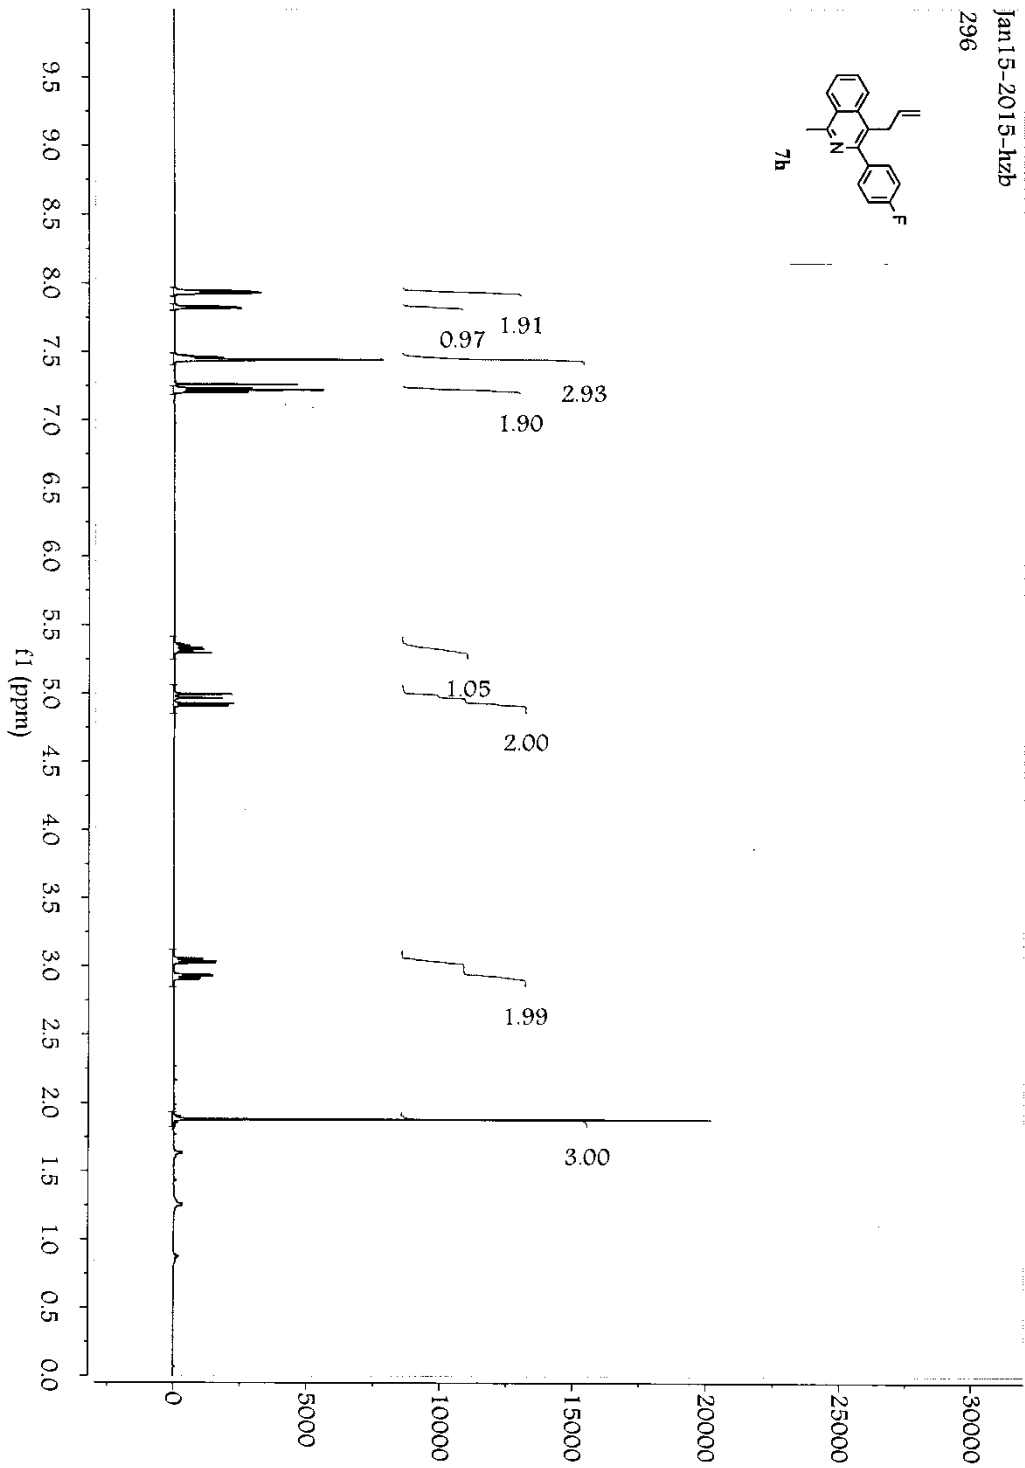

Jan 15-2015-hzlb  
296

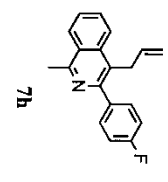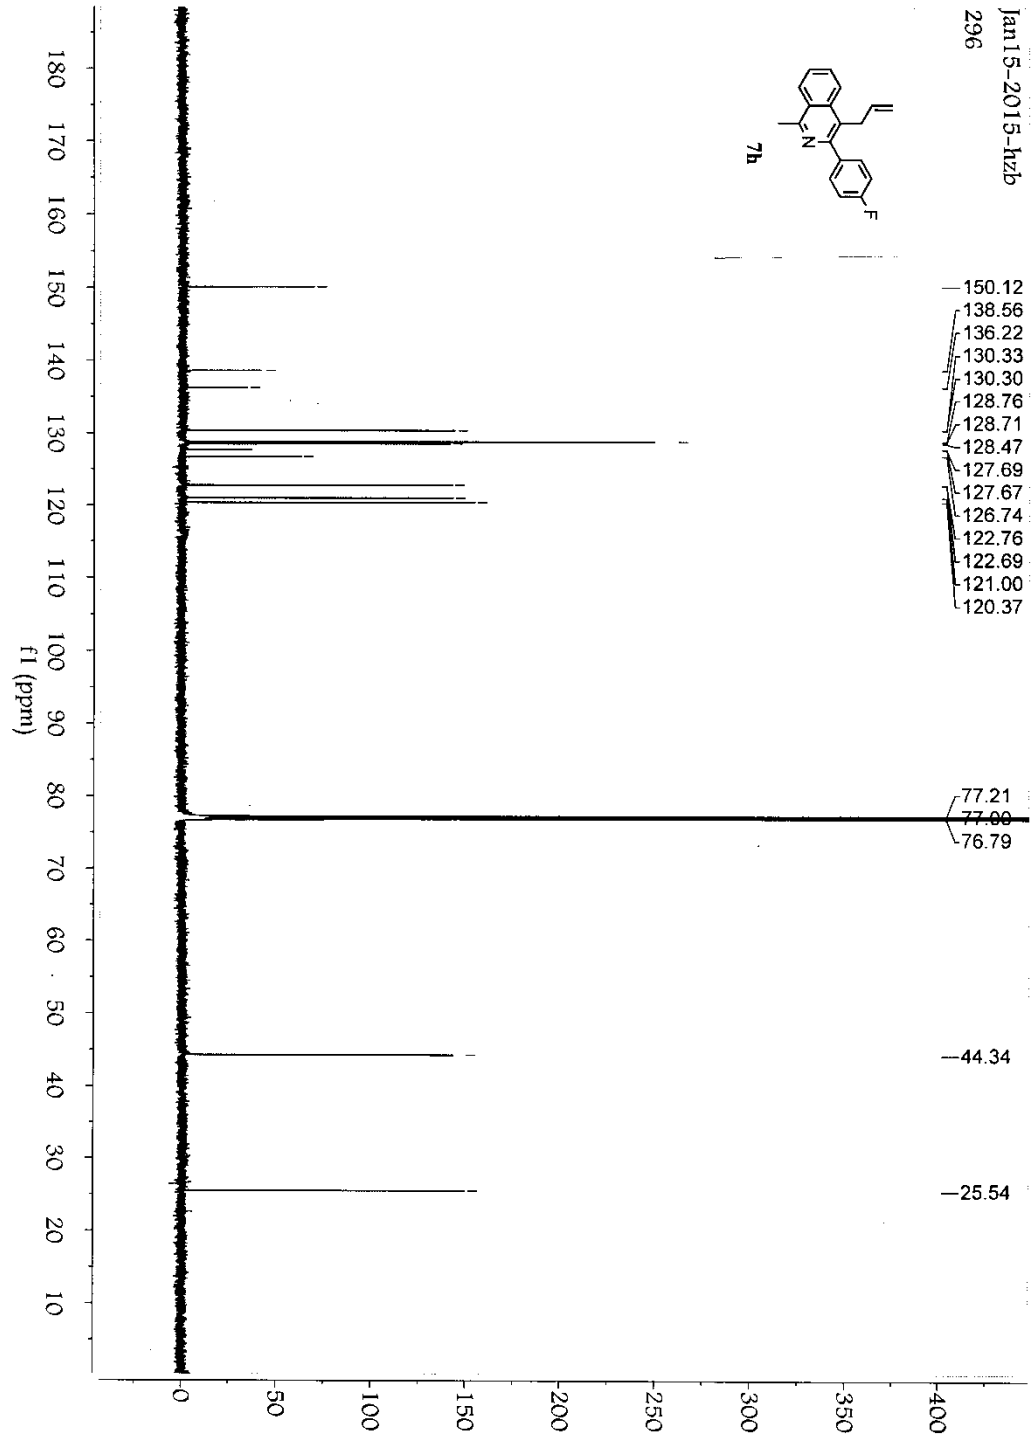

Jan15-2015-hzb  
2105 1h cdcl3

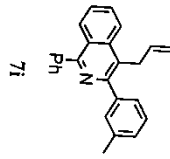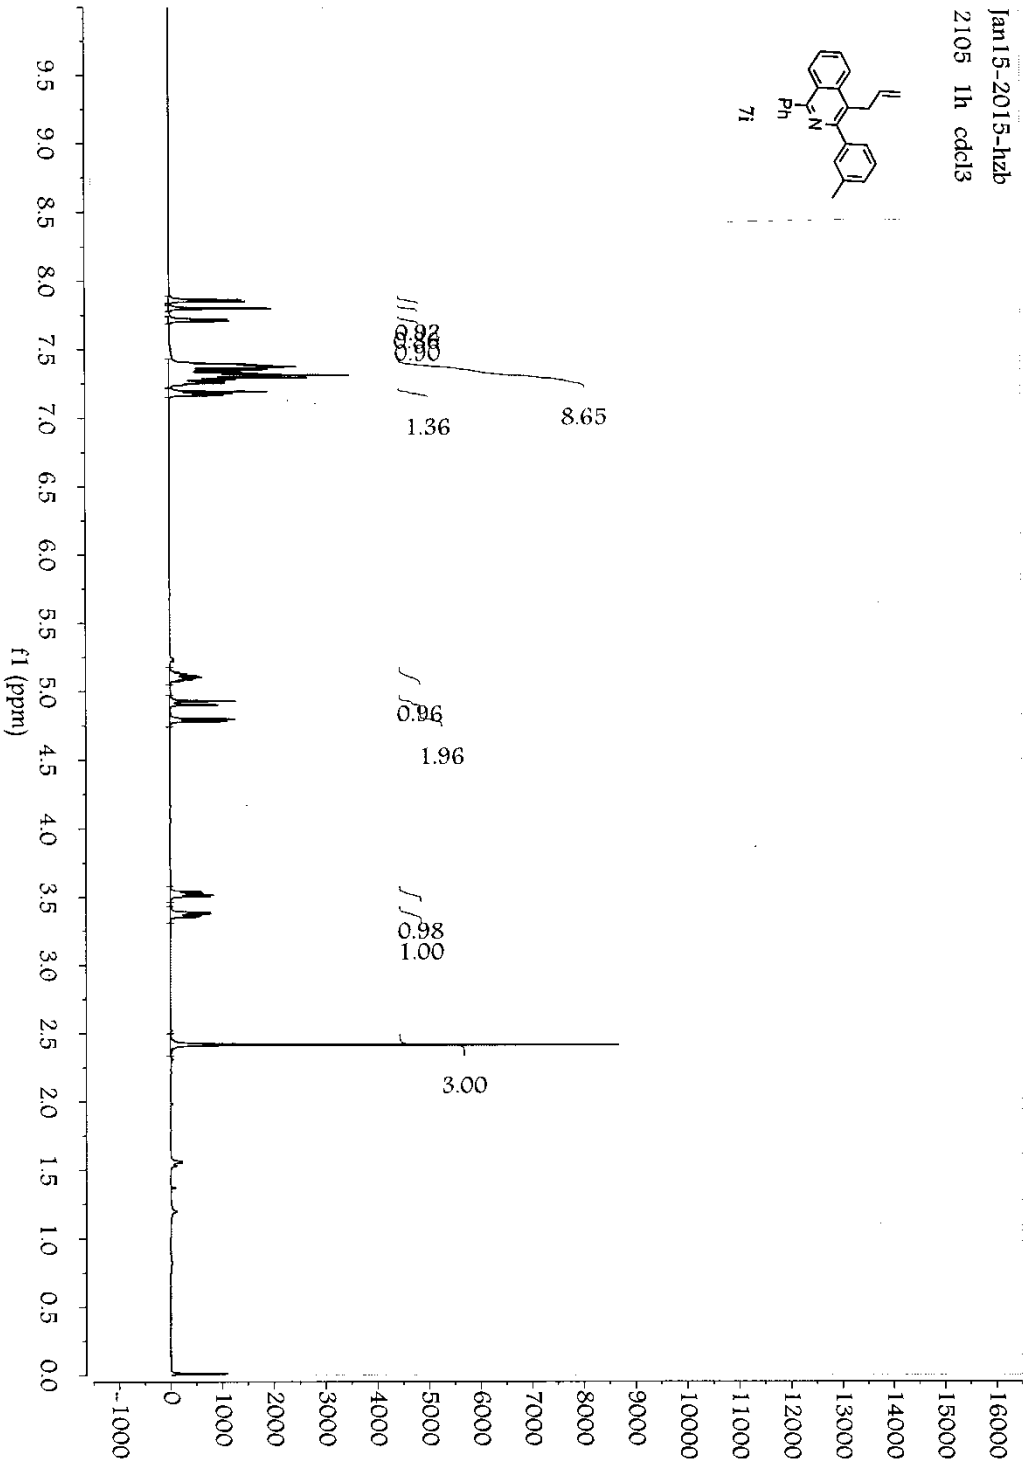

Jan15-2015-1z.b  
2105

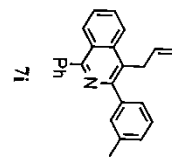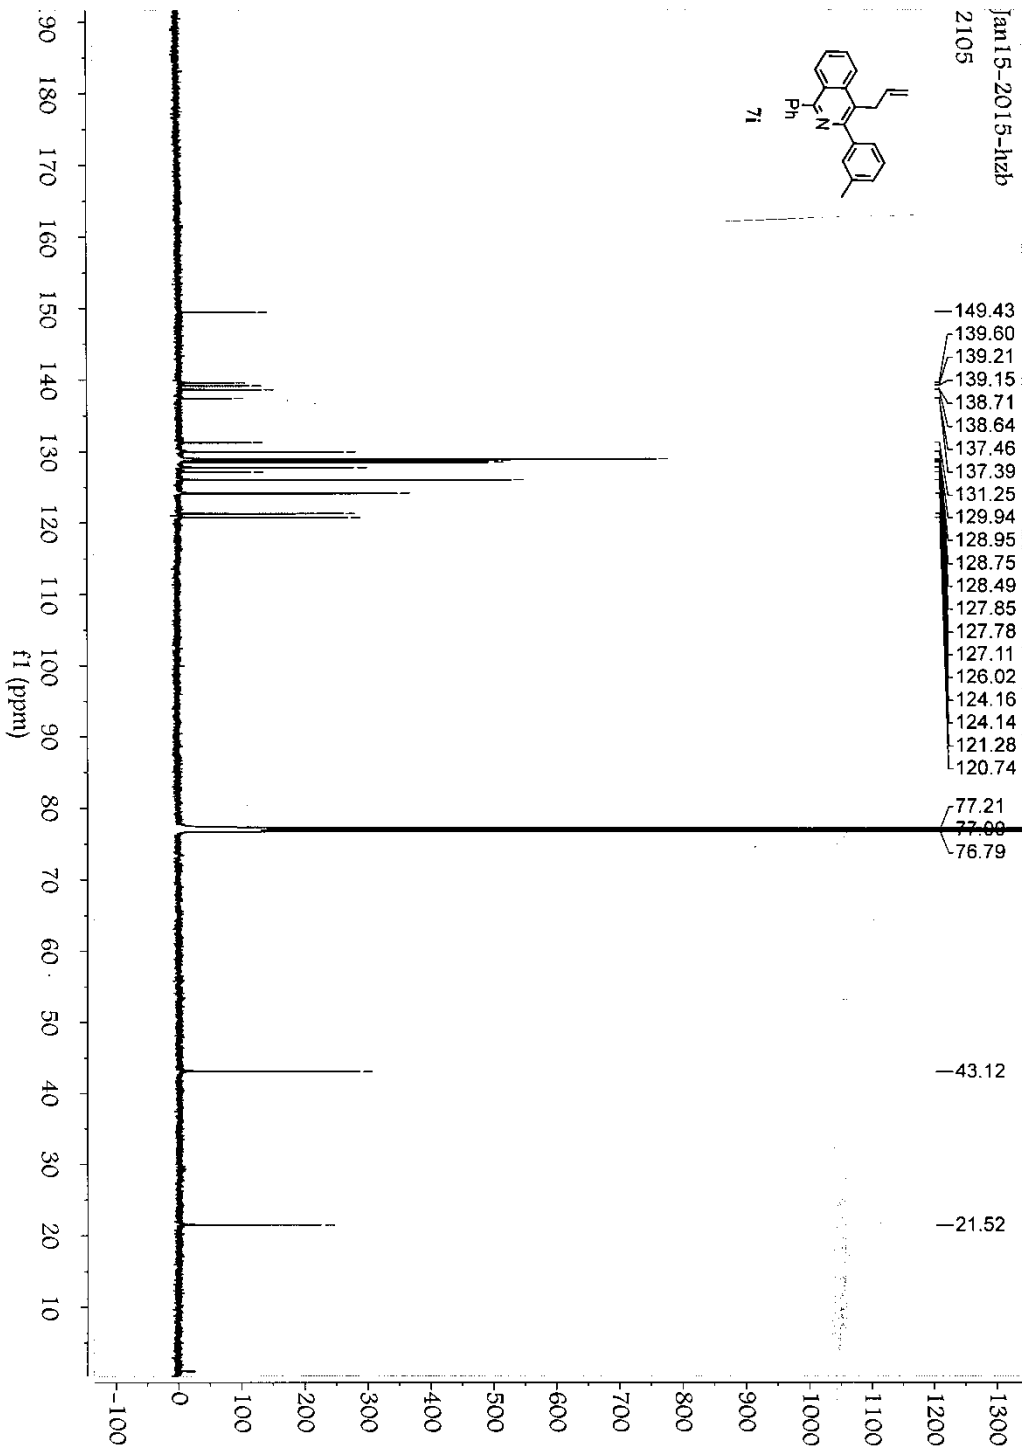

Sep16-2014-hzb  
law-291

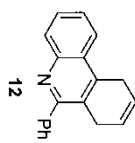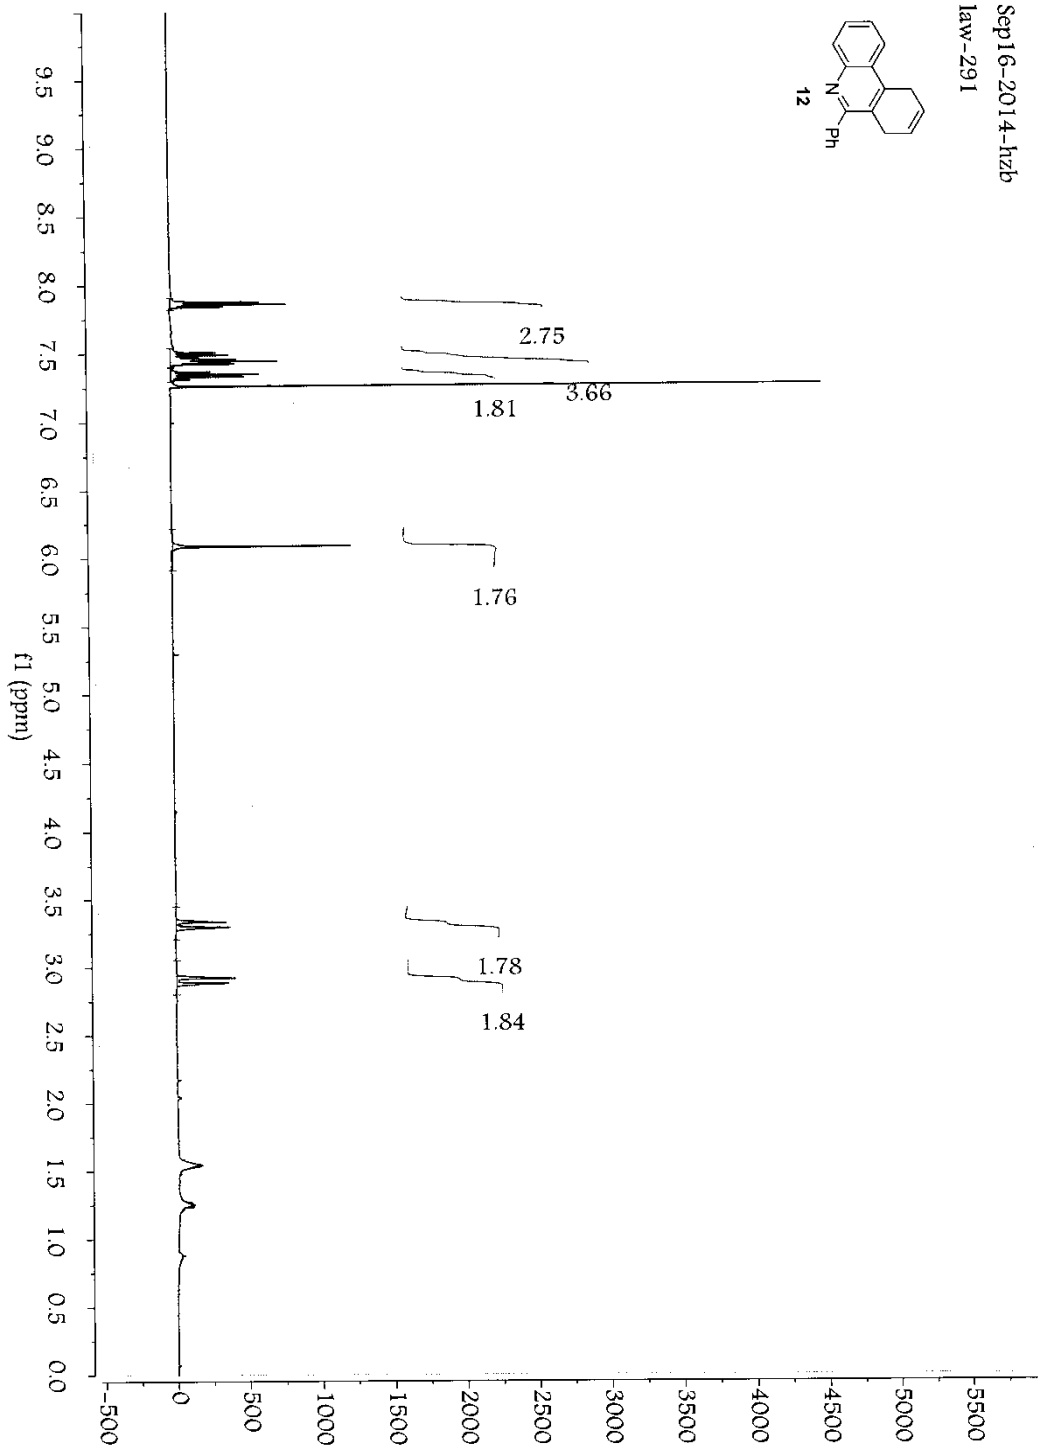

Sep18-2014-hzlh  
law-291-c

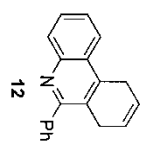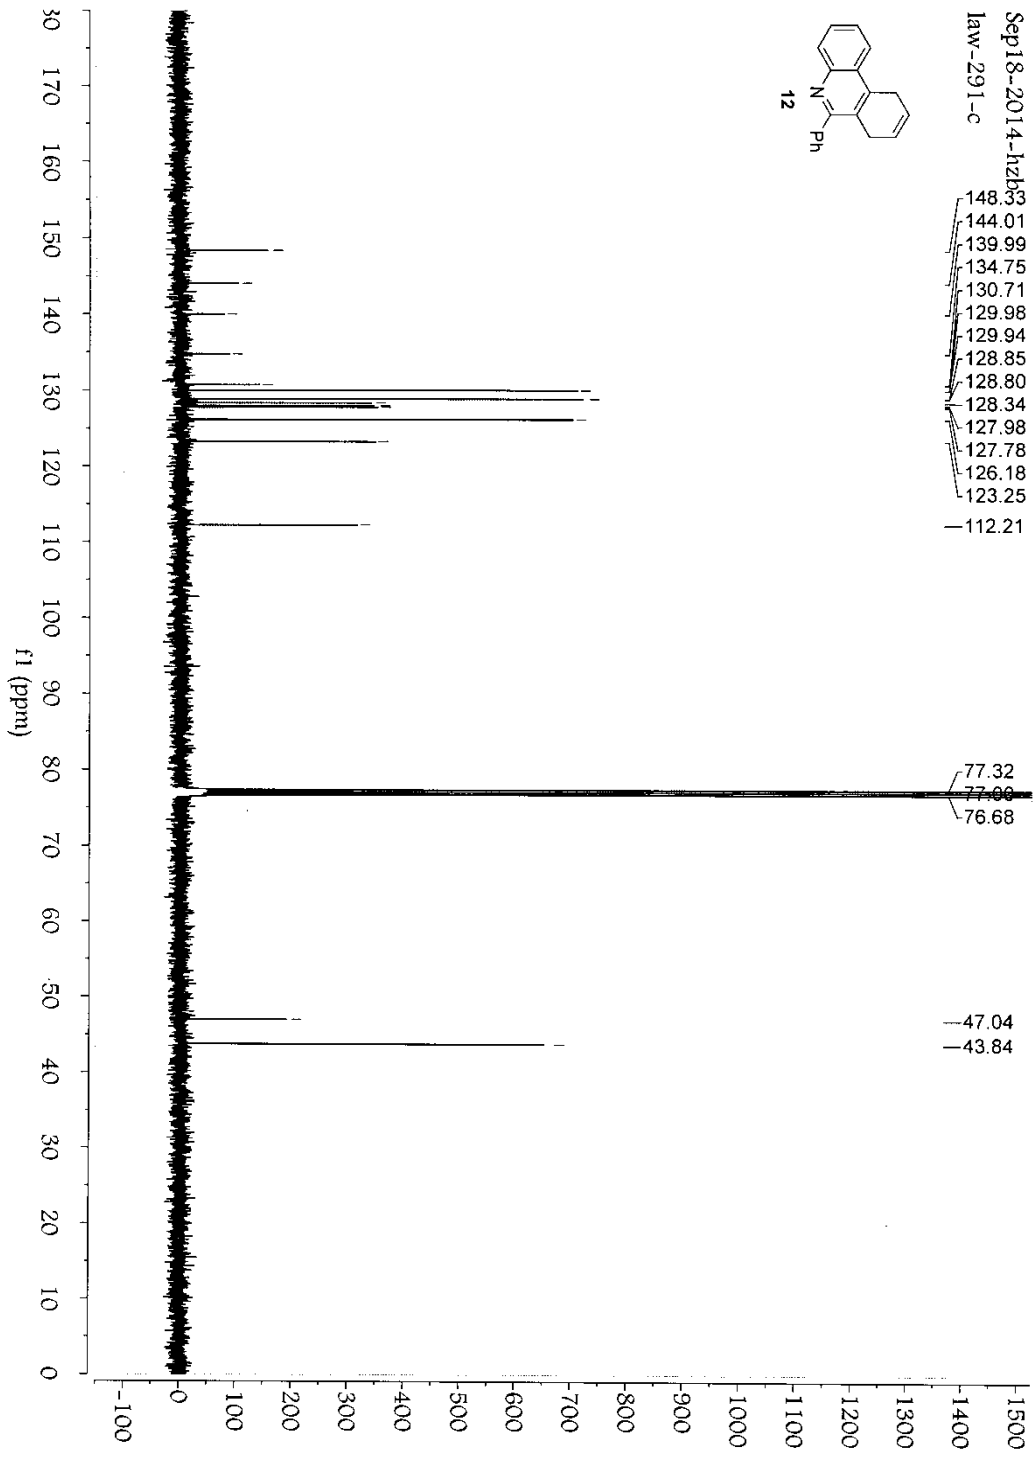

Jan13-2015-huozhibao-lj  
2104 298k cdcl3 1h

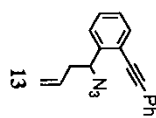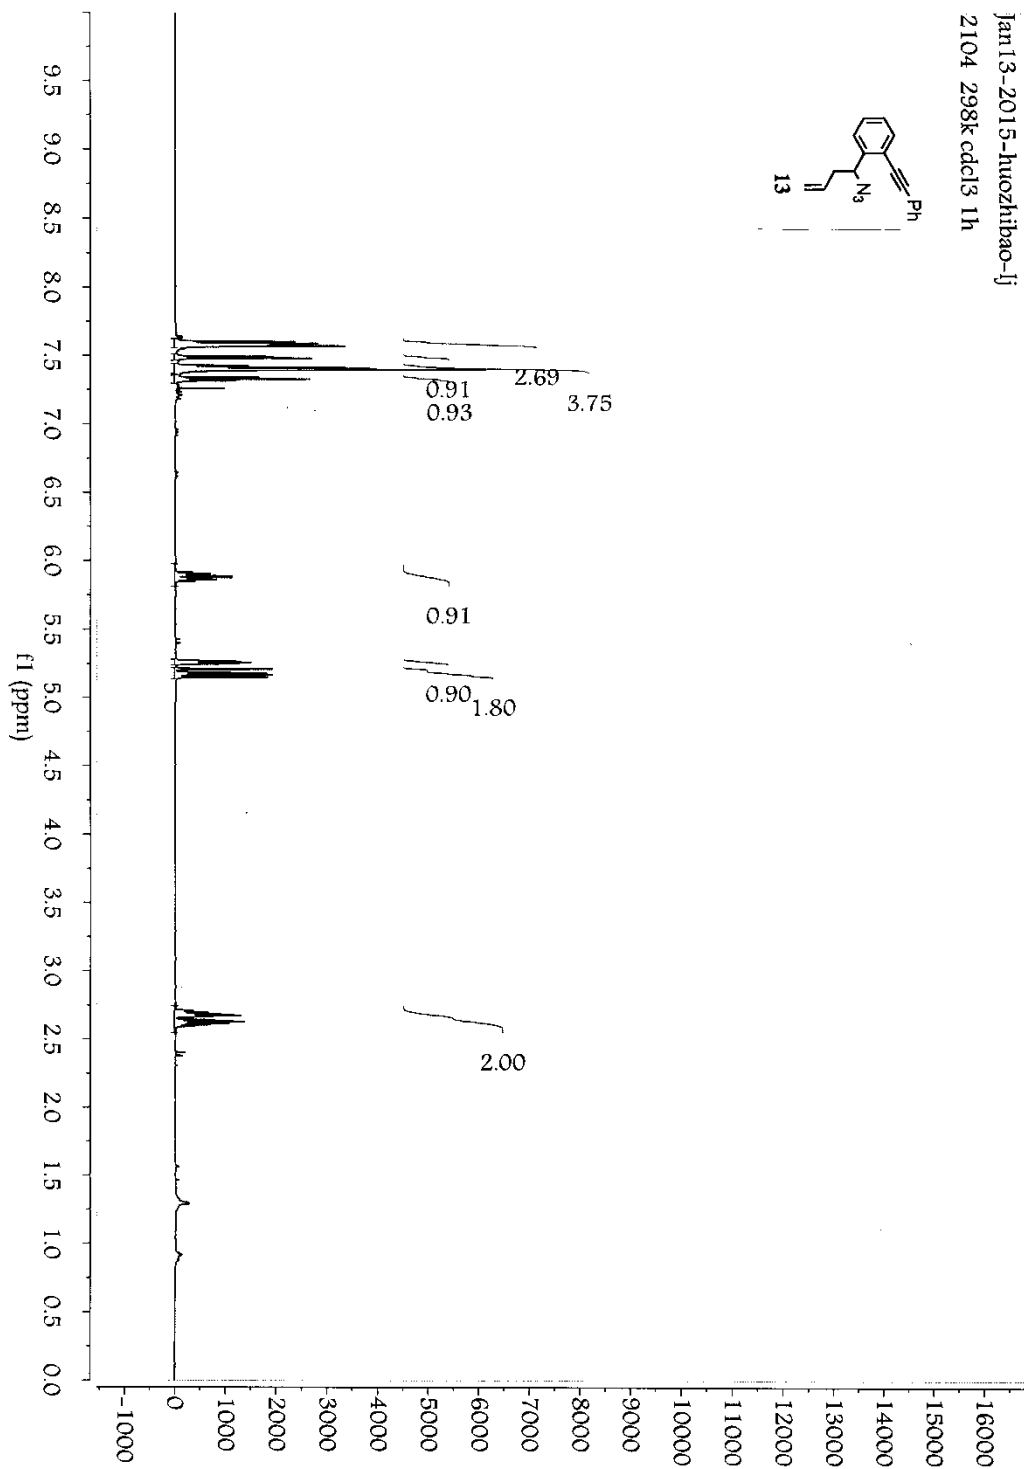

Jan 13-2015-Jhuozhibao-Ij  
2104 298K cdcl3 13C

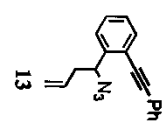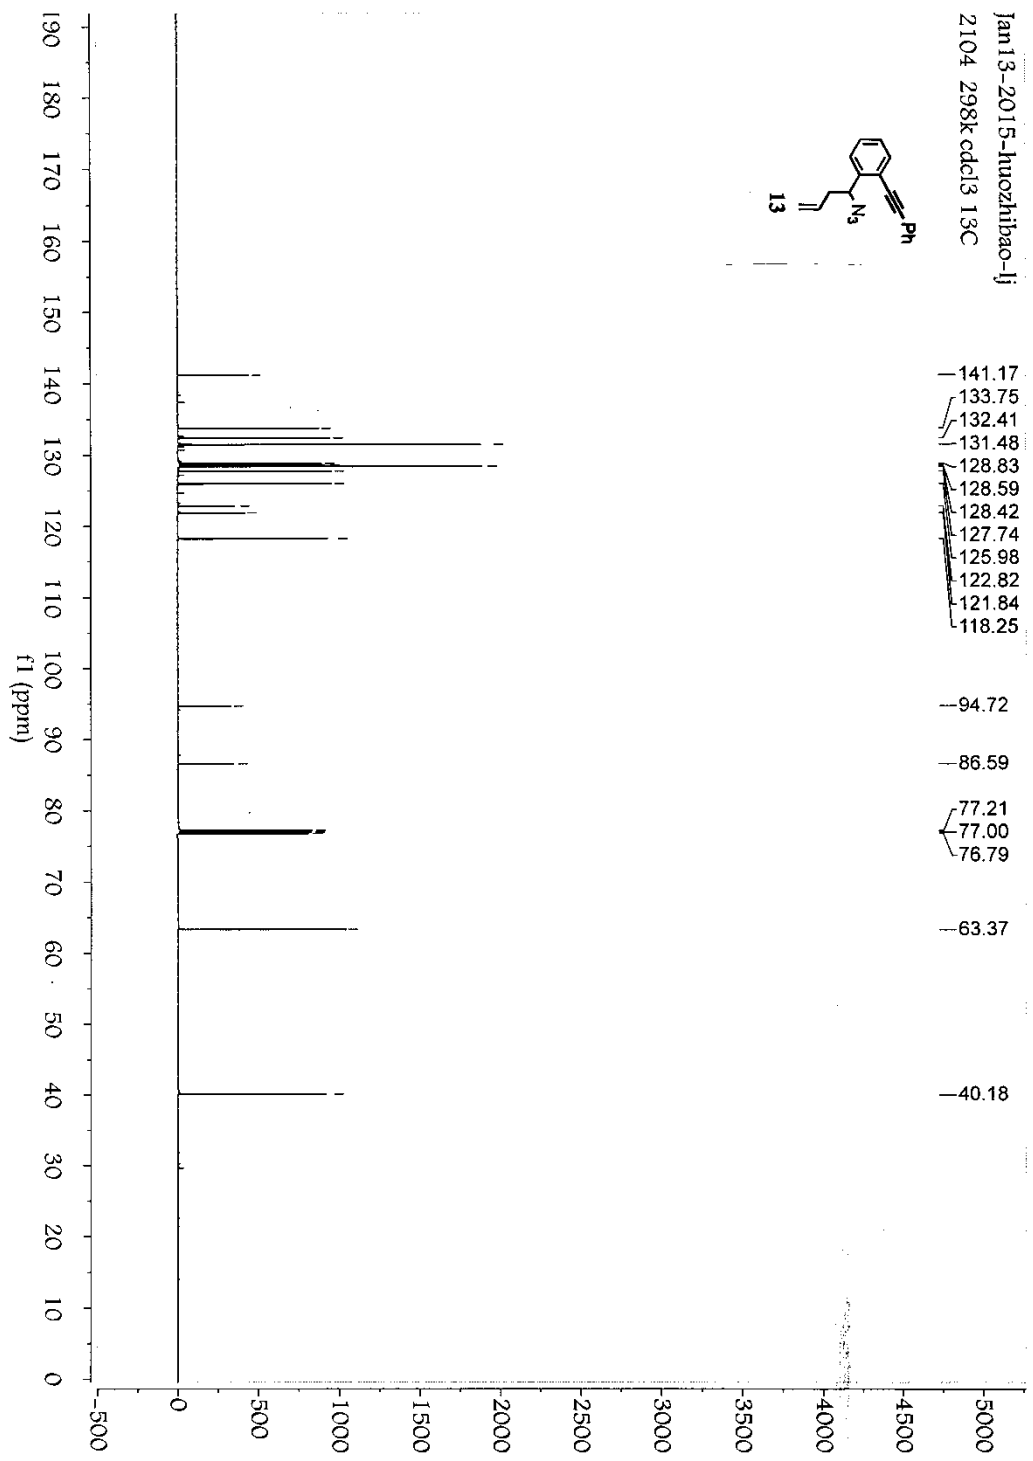

Supplement: c4ob02567a1.pdf [file c4ob02567a1.pdf]
